# Supplementary material for: Shoe configuration effects on equine forelimb gait kinetics at a walk
Source: PeerJ. 2025 Feb 26;13:e18940. doi: 10.7717/peerj.18940 (PMC11871903; doi:10.7717/peerj.18940)
Supplement: Supplemental Information 3 — Each line in the file contains data from individual trials for each horse and shoeing condition used for force and vector calculations. Measures were always normalized to weight then averaged based on shoe types. Shoeing conditions were used as a fixed effect for all statistical comparisons in mixed models. [file peerj-13-18940-s003.xlsx]

## Sheet: Force Vector Raw Data
Horse ID	Weight	Limb Side	Trial ID	Direction of Gait	Shoe	Percentage	Time calculated	Fy (N)	Fx (N)	Fz (N)	Total Ground Reaction Force Mag (N)	Coefficient of Friction	Peak Front (N)	Peak Hind (N)	Front Weight Distribution	Hind Weight Distribution
544	650.9	Left	3	L-R	Unshod	0	1.175	171.477	68.451	412.909	452.309	0.165777	3994.49	2791	0.588681	0.411319
544	650.9	Left	3	L-R	Unshod	0.05	1.2158	70.832	-8.651	423.952	429.915	0.0204056
544	650.9	Left	3	L-R	Unshod	0.1	1.2566	185.847	8.093	1044.52	1060.96	0.00774805
544	650.9	Left	3	L-R	Unshod	0.15	1.2974	341.615	-44.974	1700.27	1734.84	0.026451
544	650.9	Left	3	L-R	Unshod	0.2	1.3382	398.373	-97.022	2190.24	2228.28	0.0442975
544	650.9	Left	3	L-R	Unshod	0.25	1.379	392.786	-120.71	2526.16	2559.36	0.047784
544	650.9	Left	3	L-R	Unshod	0.3	1.4198	353.182	-142.053	2895.53	2920.45	0.0490594
544	650.9	Left	3	L-R	Unshod	0.35	1.4606	292.116	-153.547	3122.23	3139.63	0.0491786
544	650.9	Left	3	L-R	Unshod	0.4	1.5014	211.423	-163.019	3194.78	3205.92	0.0510266
544	650.9	Left	3	L-R	Unshod	0.45	1.5422	115.702	-167.673	3335.57	3341.79	0.0502681
544	650.9	Left	3	L-R	Unshod	0.5	1.583	3.157	-149.785	3619.78	3622.88	0.0413796
544	650.9	Left	3	L-R	Unshod	0.55	1.6238	-140.931	-125.013	3890.72	3895.28	0.032131
544	650.9	Left	3	L-R	Unshod	0.6	1.6646	-294.285	-103.873	3994.49	4006.66	0.0260041
544	650.9	Left	3	L-R	Unshod	0.65	1.7054	-446.207	-79.562	3843.48	3870.11	0.0207005
544	650.9	Left	3	L-R	Unshod	0.7	1.7462	-550.034	-86.558	3550.23	3593.63	0.0243809
544	650.9	Left	3	L-R	Unshod	0.75	1.787	-588.923	-79.305	3093.7	3150.25	0.0256344
544	650.9	Left	3	L-R	Unshod	0.8	1.8278	-526.412	-56.872	2533.63	2588.36	0.0224468
544	650.9	Left	3	L-R	Unshod	0.85	1.8686	-403.853	-2.329	1910.47	1952.69	0.00121907
544	650.9	Left	3	L-R	Unshod	0.9	1.9094	-283.744	42.59	1308.42	1339.51	0.0325508
544	650.9	Left	3	L-R	Unshod	0.95	1.9502	-156.362	12.056	327.323	362.953	0.0368321
544	650.9	Left	3	L-R	Unshod	1	1.991	1.199	-0.916	5	5.22271	0.1832
544	650.9	Left	4	R-L	Unshod	0	2.803	-151.039	-31.355	767.378	782.729	0.0408599	4154.61	3003	0.580447	0.419553
544	650.9	Left	4	R-L	Unshod	0.05	2.8382	-176.975	-2.017	914.669	931.635	0.00220517
544	650.9	Left	4	R-L	Unshod	0.1	2.8734	-342.549	19.464	1748.93	1782.27	0.0111291
544	650.9	Left	4	R-L	Unshod	0.15	2.9086	-376.799	71.073	2216.3	2249.23	0.0320683
544	650.9	Left	4	R-L	Unshod	0.2	2.9438	-371.718	112.529	2567.04	2596.26	0.043836
544	650.9	Left	4	R-L	Unshod	0.25	2.979	-343.744	154.886	2796.97	2822.27	0.0553763
544	650.9	Left	4	R-L	Unshod	0.3	3.0142	-310.756	160.098	2984.47	3004.87	0.0536438
544	650.9	Left	4	R-L	Unshod	0.35	3.0494	-261.917	173.362	3028.9	3045.15	0.0572359
544	650.9	Left	4	R-L	Unshod	0.4	3.0846	-194.994	186.2	3062.03	3073.88	0.0608092
544	650.9	Left	4	R-L	Unshod	0.45	3.1198	-100.316	185.84	3159.54	3166.59	0.0588187
544	650.9	Left	4	R-L	Unshod	0.5	3.155	12.267	173.616	3403.34	3407.79	0.0510134
544	650.9	Left	4	R-L	Unshod	0.55	3.1902	131.323	120.323	3780.24	3784.43	0.0318295
544	650.9	Left	4	R-L	Unshod	0.6	3.2254	280.516	85.177	4085.28	4095.78	0.0208497
544	650.9	Left	4	R-L	Unshod	0.65	3.2606	428.744	57.038	4135.34	4157.89	0.0137928
544	650.9	Left	4	R-L	Unshod	0.7	3.2958	541.134	39.684	3888.72	3926.39	0.0102049
544	650.9	Left	4	R-L	Unshod	0.75	3.331	586.902	35.099	3393.11	3443.68	0.0103442
544	650.9	Left	4	R-L	Unshod	0.8	3.3662	497.923	34.112	2624.06	2671.1	0.0129997
544	650.9	Left	4	R-L	Unshod	0.85	3.4014	335.399	14.362	1858.7	1888.77	0.0077269
544	650.9	Left	4	R-L	Unshod	0.9	3.4366	257.564	-20.651	1357.16	1381.54	0.0152163
544	650.9	Left	4	R-L	Unshod	0.95	3.4718	204.624	-35.675	841.298	866.56	0.0424047
544	650.9	Left	4	R-L	Unshod	1	3.507	6.458	-1.804	11.227	13.0769	0.160684
544	650.9	Left	5	L-R	Unshod	0	2.19	184.865	-27.437	677.073	702.393	0.040523	4196.07	3121	0.573463	0.426537
544	650.9	Left	5	L-R	Unshod	0.05	2.22835	264.772	14.741	987.955	1022.93	0.0149207
544	650.9	Left	5	L-R	Unshod	0.1	2.2667	400.784	-8.589	1778.67	1823.28	0.0048289
544	650.9	Left	5	L-R	Unshod	0.15	2.30505	501.889	62.748	2535.89	2585.84	0.024744
544	650.9	Left	5	L-R	Unshod	0.2	2.3434	510.6	94.296	2882.74	2929.13	0.0327105
544	650.9	Left	5	L-R	Unshod	0.25	2.38175	525.006	127.091	3175.12	3220.74	0.0400272
544	650.9	Left	5	L-R	Unshod	0.3	2.4201	478.62	153.866	3249.78	3288.44	0.0473465
544	650.9	Left	5	L-R	Unshod	0.35	2.45845	396.739	179.191	3224.96	3254.21	0.0555637
544	650.9	Left	5	L-R	Unshod	0.4	2.4968	274.463	174.981	3202.9	3219.4	0.0546321
544	650.9	Left	5	L-R	Unshod	0.45	2.53515	168.483	184.131	3303.22	3312.63	0.0557429
544	650.9	Left	5	L-R	Unshod	0.5	2.5735	71.751	107.954	3541.54	3543.91	0.0304822
544	650.9	Left	5	L-R	Unshod	0.55	2.61185	-56.32	33.162	3968.39	3968.93	0.00835654
544	650.9	Left	5	L-R	Unshod	0.6	2.6502	-202.516	-17.332	4193.07	4197.99	0.00413349
544	650.9	Left	5	L-R	Unshod	0.65	2.68855	-317.885	-45.251	4089.82	4102.41	0.0110643
544	650.9	Left	5	L-R	Unshod	0.7	2.7269	-408.983	-52.455	3675.38	3698.44	0.014272
544	650.9	Left	5	L-R	Unshod	0.75	2.76525	-424.441	-36.026	3044.45	3074.11	0.0118333
544	650.9	Left	5	L-R	Unshod	0.8	2.8036	-346.959	-7.772	2364.2	2389.54	0.00328736
544	650.9	Left	5	L-R	Unshod	0.85	2.84195	-292.031	-11.211	1774.98	1798.88	0.00631611
544	650.9	Left	5	L-R	Unshod	0.9	2.8803	-232.626	-32.678	1293.03	1314.2	0.0252724
544	650.9	Left	5	L-R	Unshod	0.95	2.91865	-185.688	-38.294	822.492	844.061	0.0465585
544	650.9	Left	5	L-R	Unshod	1	2.957	-3.039	-1.499	-1.896	3.88295	0.790612
544	650.9	Left	6	R-L	Unshod	0	1.746	162.787	66.796	630.945	655.021	0.105867	4289	2900	0.596606	0.403394
544	650.9	Left	6	R-L	Unshod	0.05	1.7822	154.627	-10.356	775.886	791.212	0.0133473
544	650.9	Left	6	R-L	Unshod	0.1	1.8184	327.345	2.29	1600.1	1633.24	0.00143116
544	650.9	Left	6	R-L	Unshod	0.15	1.8546	395.024	-60.785	2122.54	2159.84	0.0286379
544	650.9	Left	6	R-L	Unshod	0.2	1.8908	393.381	-103.357	2549.29	2581.53	0.0405435
544	650.9	Left	6	R-L	Unshod	0.25	1.927	361.068	-148.672	2810.08	2837.08	0.0529067
544	650.9	Left	6	R-L	Unshod	0.3	1.9632	309.867	-163.71	2963.51	2984.15	0.055242
544	650.9	Left	6	R-L	Unshod	0.35	1.9994	252.749	-177.739	2932.87	2949.1	0.0606024
544	650.9	Left	6	R-L	Unshod	0.4	2.0356	175.333	-203.921	2845.82	2858.5	0.0716563
544	650.9	Left	6	R-L	Unshod	0.45	2.0718	88.689	-202.833	2929.36	2937.71	0.0692414
544	650.9	Left	6	R-L	Unshod	0.5	2.108	-17.891	-200.259	3187.72	3194.06	0.062822
544	650.9	Left	6	R-L	Unshod	0.55	2.1442	-146.813	-178.446	3648.76	3656.07	0.0489059
544	650.9	Left	6	R-L	Unshod	0.6	2.1804	-344.789	-159.635	4157.16	4174.48	0.0384
544	650.9	Left	6	R-L	Unshod	0.65	2.2166	-515.434	-153.506	4285.94	4319.55	0.0358162
544	650.9	Left	6	R-L	Unshod	0.7	2.2528	-642.808	-150.203	4081.3	4134.34	0.0368028
544	650.9	Left	6	R-L	Unshod	0.75	2.289	-709.534	-147.085	3580.23	3652.82	0.0410826
544	650.9	Left	6	R-L	Unshod	0.8	2.3252	-525.158	-125.666	2484.12	2542.13	0.0505877
544	650.9	Left	6	R-L	Unshod	0.85	2.3614	-342.025	-63.068	1667.11	1703	0.0378307
544	650.9	Left	6	R-L	Unshod	0.9	2.3976	-231.848	-26.57	1075.63	1100.66	0.0247018
544	650.9	Left	6	R-L	Unshod	0.95	2.4338	-143.136	-1.152	383.28	409.137	0.00300564
544	650.9	Left	6	R-L	Unshod	1	2.47	-4.833	-4.423	5	8.24141	0.8846
544	650.9	Left	7	L-R	Unshod	0	2.192	124.918	22.506	605.544	618.704	0.0371666	4338.73	2890	0.600207	0.399793
544	650.9	Left	7	L-R	Unshod	0.05	2.22905	178.591	7.31	814.98	834.35	0.00896955
544	650.9	Left	7	L-R	Unshod	0.1	2.2661	335.779	8.073	1689.13	1722.2	0.00477937
544	650.9	Left	7	L-R	Unshod	0.15	2.30315	395.269	-54.619	2199.92	2235.81	0.0248278
544	650.9	Left	7	L-R	Unshod	0.2	2.3402	383.332	-94.715	2569.36	2599.52	0.0368633
544	650.9	Left	7	L-R	Unshod	0.25	2.37725	332.145	-120.926	2761.02	2783.56	0.0437976
544	650.9	Left	7	L-R	Unshod	0.3	2.4143	285.876	-132.758	2909.37	2926.39	0.0456312
544	650.9	Left	7	L-R	Unshod	0.35	2.45135	235.595	-136.201	2923.5	2936.13	0.0465884
544	650.9	Left	7	L-R	Unshod	0.4	2.4884	171.929	-152.79	2859.87	2869.11	0.0534255
544	650.9	Left	7	L-R	Unshod	0.45	2.52545	78.053	-148.86	2914.42	2919.26	0.051077
544	650.9	Left	7	L-R	Unshod	0.5	2.5625	-5.591	-127.317	3196.52	3199.06	0.0398299
544	650.9	Left	7	L-R	Unshod	0.55	2.59955	-119.574	-78.705	3710.84	3713.6	0.0212095
544	650.9	Left	7	L-R	Unshod	0.6	2.6366	-294.701	-20.862	4206.27	4216.64	0.00495974
544	650.9	Left	7	L-R	Unshod	0.65	2.67365	-441.311	15.882	4337.55	4359.97	0.00366151
544	650.9	Left	7	L-R	Unshod	0.7	2.7107	-559.024	33.467	4070.19	4108.54	0.00822246
544	650.9	Left	7	L-R	Unshod	0.75	2.74775	-599.431	37.059	3569.55	3619.72	0.010382
544	650.9	Left	7	L-R	Unshod	0.8	2.7848	-538.895	23.136	2851.98	2902.54	0.00811225
544	650.9	Left	7	L-R	Unshod	0.85	2.82185	-353.721	16.835	1962.19	1993.89	0.00857969
544	650.9	Left	7	L-R	Unshod	0.9	2.8589	-283.421	30.253	1460.06	1487.62	0.0207204
544	650.9	Left	7	L-R	Unshod	0.95	2.89595	-224.663	39.455	863.484	893.104	0.0456928
544	650.9	Left	7	L-R	Unshod	1	2.933	-7.58	0.312	4.243	8.69234	0.0735329
544	650.9	Right	2	R-L	Unshod	0	1.616	-34.766	30.395	144.868	152.05	0.209812	4530.63	3340	0.575638	0.424362
544	650.9	Right	2	R-L	Unshod	0.05	1.64628	-78.654	-33.394	583.423	589.647	0.0572381
544	650.9	Right	2	R-L	Unshod	0.1	1.67655	-87.65	-60.022	1134.48	1139.44	0.052907
544	650.9	Right	2	R-L	Unshod	0.15	1.70683	-273.858	19.67	2048.57	2066.89	0.00960183
544	650.9	Right	2	R-L	Unshod	0.2	1.7371	-268.01	-22.217	2402.97	2417.98	0.00924562
544	650.9	Right	2	R-L	Unshod	0.25	1.76737	-342.675	-25.892	2889.57	2909.94	0.00896049
544	650.9	Right	2	R-L	Unshod	0.3	1.79765	-361.11	-31.689	3300.4	3320.25	0.00960156
544	650.9	Right	2	R-L	Unshod	0.35	1.82793	-321.746	-35.1	3510.63	3525.52	0.00999821
544	650.9	Right	2	R-L	Unshod	0.4	1.8582	-250.82	-29.848	3634.45	3643.22	0.00821252
544	650.9	Right	2	R-L	Unshod	0.45	1.88847	-164.627	-31.95	3840.93	3844.59	0.0083183
544	650.9	Right	2	R-L	Unshod	0.5	1.91875	-77.741	3.779	4229.53	4230.25	0.000893479
544	650.9	Right	2	R-L	Unshod	0.55	1.94903	62.848	4.799	4508.46	4508.9	0.00106444
544	650.9	Right	2	R-L	Unshod	0.6	1.9793	207.023	16.212	4492.32	4497.12	0.00360882
544	650.9	Right	2	R-L	Unshod	0.65	2.00957	344.608	31.949	4240.96	4255.05	0.00753344
544	650.9	Right	2	R-L	Unshod	0.7	2.03985	424.415	22.696	3761.73	3785.66	0.0060334
544	650.9	Right	2	R-L	Unshod	0.75	2.07012	438.541	-0.132	3162.81	3193.07	4.1735e-05
544	650.9	Right	2	R-L	Unshod	0.8	2.1004	355.964	-30.462	2458.41	2484.23	0.012391
544	650.9	Right	2	R-L	Unshod	0.85	2.13068	217.991	-20.578	1759.25	1772.83	0.011697
544	650.9	Right	2	R-L	Unshod	0.9	2.16095	203.456	-20.427	1278.84	1295.08	0.0159731
544	650.9	Right	2	R-L	Unshod	0.95	2.19122	192.319	-25.311	631.928	661.03	0.0400536
544	650.9	Right	2	R-L	Unshod	1	2.2215	2.09	4.308	4.657	6.67942	0.925059
544	650.9	Right	3	L-R	Unshod	0	1.764	149.996	-6.685	628.944	646.617	0.0106289	3997.35	2980	0.572904	0.427096
544	650.9	Right	3	L-R	Unshod	0.05	1.799	248.729	2.301	979.057	1010.16	0.00235022
544	650.9	Right	3	L-R	Unshod	0.1	1.834	348.323	16.732	1699.56	1734.97	0.0098449
544	650.9	Right	3	L-R	Unshod	0.15	1.869	491.003	40.852	2586.85	2633.35	0.0157922
544	650.9	Right	3	L-R	Unshod	0.2	1.904	479.344	114.235	2987	3027.37	0.0382441
544	650.9	Right	3	L-R	Unshod	0.25	1.939	494.663	157.024	3337.46	3377.57	0.047049
544	650.9	Right	3	L-R	Unshod	0.3	1.974	456.525	173.067	3434.14	3468.67	0.0503961
544	650.9	Right	3	L-R	Unshod	0.35	2.009	383.721	183.414	3358.01	3384.83	0.0546199
544	650.9	Right	3	L-R	Unshod	0.4	2.044	281.918	204.255	3234.31	3252.99	0.0631526
544	650.9	Right	3	L-R	Unshod	0.45	2.079	184.311	185.994	3221.06	3231.69	0.057743
544	650.9	Right	3	L-R	Unshod	0.5	2.114	92.486	148.007	3312.9	3317.5	0.0446759
544	650.9	Right	3	L-R	Unshod	0.55	2.149	-7.51	82.436	3625.77	3626.72	0.0227361
544	650.9	Right	3	L-R	Unshod	0.6	2.184	-137.546	30.549	3918.68	3921.21	0.00779574
544	650.9	Right	3	L-R	Unshod	0.65	2.219	-272.372	-8.397	3992.88	4002.17	0.00210299
544	650.9	Right	3	L-R	Unshod	0.7	2.254	-387.155	-39.012	3822.69	3842.44	0.0102054
544	650.9	Right	3	L-R	Unshod	0.75	2.289	-455.766	-45.44	3407.96	3438.6	0.0133335
544	650.9	Right	3	L-R	Unshod	0.8	2.324	-408.305	-24.853	2699.15	2729.97	0.00920771
544	650.9	Right	3	L-R	Unshod	0.85	2.359	-300.267	-19.371	1974	1996.8	0.00981309
544	650.9	Right	3	L-R	Unshod	0.9	2.394	-248.864	-29.451	1435.45	1457.16	0.020517
544	650.9	Right	3	L-R	Unshod	0.95	2.429	-205.332	-33.945	879.922	904.199	0.0385773
544	650.9	Right	3	L-R	Unshod	1	2.464	-10.31	-1.627	5.1	11.6169	0.31902
544	650.9	Right	4	R-L	Unshod	0	2.978	-128.145	37.74	489.882	507.769	0.077039	3885.49	2893	0.573209	0.426791
544	650.9	Right	4	R-L	Unshod	0.05	3.01715	-214.184	-33.243	887.012	913.11	0.0374775
544	650.9	Right	4	R-L	Unshod	0.1	3.0563	-376.236	-33.848	1737.74	1778.33	0.0194781
544	650.9	Right	4	R-L	Unshod	0.15	3.09545	-320.773	-40.435	2403.1	2424.75	0.0168262
544	650.9	Right	4	R-L	Unshod	0.2	3.1346	-449.589	-148.691	2827.28	2866.66	0.0525915
544	650.9	Right	4	R-L	Unshod	0.25	3.17375	-444.985	-182.689	3155.24	3191.7	0.0579002
544	650.9	Right	4	R-L	Unshod	0.3	3.2129	-409.863	-202.495	3263.2	3295.07	0.062054
544	650.9	Right	4	R-L	Unshod	0.35	3.25205	-330.48	-225.839	3240.24	3264.86	0.0696983
544	650.9	Right	4	R-L	Unshod	0.4	3.2912	-223.419	-229.76	3205	3220.98	0.0716879
544	650.9	Right	4	R-L	Unshod	0.45	3.33035	-124.965	-214.377	3192.19	3201.82	0.0671567
544	650.9	Right	4	R-L	Unshod	0.5	3.3695	-31.98	-146.413	3255.38	3258.83	0.0449757
544	650.9	Right	4	R-L	Unshod	0.55	3.40865	65.014	-82.392	3526.06	3527.62	0.0233666
544	650.9	Right	4	R-L	Unshod	0.6	3.4478	209.849	-34.889	3803.08	3809.03	0.00917388
544	650.9	Right	4	R-L	Unshod	0.65	3.48695	364.414	-0.167	3883.33	3900.39	4.30043e-05
544	650.9	Right	4	R-L	Unshod	0.7	3.5261	498.252	24.078	3698.35	3731.84	0.00651047
544	650.9	Right	4	R-L	Unshod	0.75	3.56525	562.776	26.853	3262.33	3310.62	0.00823124
544	650.9	Right	4	R-L	Unshod	0.8	3.6044	510.976	4.667	2682.1	2730.34	0.00174006
544	650.9	Right	4	R-L	Unshod	0.85	3.64355	370.491	-9.577	1962.28	1996.97	0.00488055
544	650.9	Right	4	R-L	Unshod	0.9	3.6827	299.794	-6.338	1439.65	1470.55	0.00440245
544	650.9	Right	4	R-L	Unshod	0.95	3.72185	212.585	11.133	839.356	865.93	0.0132637
544	650.9	Right	4	R-L	Unshod	1	3.761	-0.72	16.303	17	23.5649	0.959
544	650.9	Right	5	L-R	Unshod	0	2.191	184.865	-27.437	677.073	702.393	0.040523	4196.07	2910	0.590491	0.409509
544	650.9	Right	5	L-R	Unshod	0.05	2.2293	264.772	14.741	987.955	1022.93	0.0149207
544	650.9	Right	5	L-R	Unshod	0.1	2.2676	400.784	-8.589	1778.67	1823.28	0.0048289
544	650.9	Right	5	L-R	Unshod	0.15	2.3059	501.889	62.748	2535.89	2585.84	0.024744
544	650.9	Right	5	L-R	Unshod	0.2	2.3442	510.6	94.296	2882.74	2929.13	0.0327105
544	650.9	Right	5	L-R	Unshod	0.25	2.3825	525.006	127.091	3175.12	3220.74	0.0400272
544	650.9	Right	5	L-R	Unshod	0.3	2.4208	478.62	153.866	3249.78	3288.44	0.0473465
544	650.9	Right	5	L-R	Unshod	0.35	2.4591	396.739	179.191	3224.96	3254.21	0.0555637
544	650.9	Right	5	L-R	Unshod	0.4	2.4974	274.463	174.981	3202.9	3219.4	0.0546321
544	650.9	Right	5	L-R	Unshod	0.45	2.5357	168.483	184.131	3303.22	3312.63	0.0557429
544	650.9	Right	5	L-R	Unshod	0.5	2.574	71.751	107.954	3541.54	3543.91	0.0304822
544	650.9	Right	5	L-R	Unshod	0.55	2.6123	-56.32	33.162	3968.39	3968.93	0.00835654
544	650.9	Right	5	L-R	Unshod	0.6	2.6506	-202.516	-17.332	4193.07	4197.99	0.00413349
544	650.9	Right	5	L-R	Unshod	0.65	2.6889	-317.885	-45.251	4089.82	4102.41	0.0110643
544	650.9	Right	5	L-R	Unshod	0.7	2.7272	-408.983	-52.455	3675.38	3698.44	0.014272
544	650.9	Right	5	L-R	Unshod	0.75	2.7655	-424.441	-36.026	3044.45	3074.11	0.0118333
544	650.9	Right	5	L-R	Unshod	0.8	2.8038	-346.959	-7.772	2364.2	2389.54	0.00328736
544	650.9	Right	5	L-R	Unshod	0.85	2.8421	-292.031	-11.211	1774.98	1798.88	0.00631611
544	650.9	Right	5	L-R	Unshod	0.9	2.8804	-232.626	-32.678	1293.03	1314.2	0.0252724
544	650.9	Right	5	L-R	Unshod	0.95	2.9187	-185.688	-38.294	822.492	844.061	0.0465585
544	650.9	Right	5	L-R	Unshod	1	2.957	-3.039	-1.499	-1.896	3.88295	0.790612
544	650.9	Right	6	R-L	Unshod	0	1.291	-203.384	84.932	638.565	675.532	0.133004	3920.98	2955	0.570243	0.429757
544	650.9	Right	6	R-L	Unshod	0.05	1.32925	-231.067	-51.329	869.288	900.937	0.0590472
544	650.9	Right	6	R-L	Unshod	0.1	1.3675	-408.876	-48.37	1672.12	1722.07	0.0289273
544	650.9	Right	6	R-L	Unshod	0.15	1.40575	-505.943	-80.471	2447.96	2500.99	0.0328727
544	650.9	Right	6	R-L	Unshod	0.2	1.444	-477.438	-149.134	2731.53	2776.95	0.0545973
544	650.9	Right	6	R-L	Unshod	0.25	1.48225	-508.143	-183.588	3115.19	3161.69	0.0589332
544	650.9	Right	6	R-L	Unshod	0.3	1.5205	-468.378	-220.681	3263.68	3304.49	0.0676173
544	650.9	Right	6	R-L	Unshod	0.35	1.55875	-389.54	-244.111	3264.29	3296.5	0.0747823
544	650.9	Right	6	R-L	Unshod	0.4	1.597	-272.8	-243.053	3215.6	3236.29	0.0755856
544	650.9	Right	6	R-L	Unshod	0.45	1.63525	-164.639	-205.649	3253.43	3264.07	0.06321
544	650.9	Right	6	R-L	Unshod	0.5	1.6735	-88.789	-164.53	3427.76	3432.86	0.0479992
544	650.9	Right	6	R-L	Unshod	0.55	1.71175	36.003	-105.328	3765.95	3767.6	0.0279685
544	650.9	Right	6	R-L	Unshod	0.6	1.75	181.389	-69.356	3920.49	3925.3	0.0176906
544	650.9	Right	6	R-L	Unshod	0.65	1.78825	306.788	-39.545	3850.11	3862.52	0.0102711
544	650.9	Right	6	R-L	Unshod	0.7	1.8265	418.198	-16.928	3531.2	3555.92	0.00479384
544	650.9	Right	6	R-L	Unshod	0.75	1.86475	470.34	-14.262	3110.12	3145.52	0.00458567
544	650.9	Right	6	R-L	Unshod	0.8	1.903	405.695	-30.143	2406.58	2440.72	0.0125252
544	650.9	Right	6	R-L	Unshod	0.85	1.94125	296.251	-12.947	1724.42	1749.73	0.00750804
544	650.9	Right	6	R-L	Unshod	0.9	1.9795	242.547	-13.959	1301.32	1323.8	0.0107268
544	650.9	Right	6	R-L	Unshod	0.95	2.01775	180.908	15.1	779.813	800.665	0.0193636
544	650.9	Right	6	R-L	Unshod	1	2.056	-1.379	0.789	-0.98	1.8667	0.805102
544	650.9	Right	8	R-L	Unshod	0	1.573	-126.088	69.306	492.466	513.054	0.140733	3926.52	2912	0.574177	0.425823
544	650.9	Right	8	R-L	Unshod	0.05	1.61185	-219.441	4.574	888.344	915.058	0.00514891
544	650.9	Right	8	R-L	Unshod	0.1	1.6507	-333.585	38.328	1598.91	1633.79	0.0239713
544	650.9	Right	8	R-L	Unshod	0.15	1.68955	-379.559	-17.347	2158.97	2192.15	0.00803485
544	650.9	Right	8	R-L	Unshod	0.2	1.7284	-462.452	-63.337	2674.36	2714.79	0.0236831
544	650.9	Right	8	R-L	Unshod	0.25	1.76725	-474.19	-95.777	3000.39	3039.14	0.0319215
544	650.9	Right	8	R-L	Unshod	0.3	1.8061	-450.232	-114.843	3152.21	3186.27	0.0364325
544	650.9	Right	8	R-L	Unshod	0.35	1.84495	-387.146	-146.612	3173.64	3200.53	0.0461967
544	650.9	Right	8	R-L	Unshod	0.4	1.8838	-289.555	-169.595	3184.89	3202.52	0.0532499
544	650.9	Right	8	R-L	Unshod	0.45	1.92265	-177.452	-168.569	3255.6	3264.79	0.0517781
544	650.9	Right	8	R-L	Unshod	0.5	1.9615	-76.627	-139.147	3403.83	3407.54	0.0408795
544	650.9	Right	8	R-L	Unshod	0.55	2.00035	47.225	-92.435	3705.63	3707.08	0.0249445
544	650.9	Right	8	R-L	Unshod	0.6	2.0392	180.645	-62.252	3901.73	3906.4	0.015955
544	650.9	Right	8	R-L	Unshod	0.65	2.07805	324.627	-22.305	3868.18	3881.84	0.00576627
544	650.9	Right	8	R-L	Unshod	0.7	2.1169	431.745	-3.018	3553.4	3579.53	0.000849328
544	650.9	Right	8	R-L	Unshod	0.75	2.15575	474.525	2.867	3072.21	3108.64	0.000933205
544	650.9	Right	8	R-L	Unshod	0.8	2.1946	425.863	-7.061	2517.4	2553.18	0.00280488
544	650.9	Right	8	R-L	Unshod	0.85	2.23345	317.707	4.723	1850.57	1877.65	0.00255219
544	650.9	Right	8	R-L	Unshod	0.9	2.2723	252.696	25.378	1364.85	1388.28	0.0185939
544	650.9	Right	8	R-L	Unshod	0.95	2.31115	188.731	26.308	814.232	836.233	0.0323102
544	650.9	Right	8	R-L	Unshod	1	2.35	-0.941	0.613	-3.582	3.75393	0.171133
714	501.21	Left	1	L-R	Unshod	0	0.89	239.621	-1.911	752.92	790.133	0.00253812	3107.28	2158	0.590146	0.409854
714	501.21	Left	1	L-R	Unshod	0.05	0.9268	214.255	-7.642	841.386	868.271	0.00908263
714	501.21	Left	1	L-R	Unshod	0.1	0.9636	329.08	17.562	1637.07	1669.91	0.0107277
714	501.21	Left	1	L-R	Unshod	0.15	1.0004	362.207	81.374	2048.98	2082.34	0.0397144
714	501.21	Left	1	L-R	Unshod	0.2	1.0372	343.173	112.505	2192.46	2222	0.0513145
714	501.21	Left	1	L-R	Unshod	0.25	1.074	315.935	123.261	2278.35	2303.45	0.0541009
714	501.21	Left	1	L-R	Unshod	0.3	1.1108	255.46	101.474	2347.77	2363.81	0.0432214
714	501.21	Left	1	L-R	Unshod	0.35	1.1476	190.634	81.828	2401.07	2410.01	0.0340798
714	501.21	Left	1	L-R	Unshod	0.4	1.1844	135.396	47.386	2516.74	2520.83	0.0188283
714	501.21	Left	1	L-R	Unshod	0.45	1.2212	66.231	-0.664	2730.48	2731.29	0.00024318
714	501.21	Left	1	L-R	Unshod	0.5	1.258	-18.553	-35.476	2944.88	2945.15	0.0120467
714	501.21	Left	1	L-R	Unshod	0.55	1.2948	-111.959	-79.381	3085.96	3089.01	0.0257233
714	501.21	Left	1	L-R	Unshod	0.6	1.3316	-219.6	-119.573	3089.84	3099.94	0.0386987
714	501.21	Left	1	L-R	Unshod	0.65	1.3684	-299.035	-117.817	2929.41	2946.99	0.0402187
714	501.21	Left	1	L-R	Unshod	0.7	1.4052	-347.144	-85.604	2554.17	2579.07	0.0335154
714	501.21	Left	1	L-R	Unshod	0.75	1.442	-330.483	-42.692	2139.05	2164.85	0.0199584
714	501.21	Left	1	L-R	Unshod	0.8	1.4788	-296.961	-0.737	1783.59	1808.14	0.000413212
714	501.21	Left	1	L-R	Unshod	0.85	1.5156	-275.887	-22.393	1467.85	1493.72	0.0152556
714	501.21	Left	1	L-R	Unshod	0.9	1.5524	-219.593	-44.9	1139.22	1161.06	0.039413
714	501.21	Left	1	L-R	Unshod	0.95	1.5892	-169.643	-56.817	691.54	714.307	0.0821601
714	501.21	Left	1	L-R	Unshod	1	1.626	-1.072	0.5	1.216	1.69642	0.411184
714	501.21	Left	2	R-L	Unshod	0	1.299	-140.711	-8.219	514.417	533.378	0.0159773	3106.17	2453	0.558747	0.441253
714	501.21	Left	2	R-L	Unshod	0.05	1.33495	-171.739	41.78	689.26	711.561	0.0606157
714	501.21	Left	2	R-L	Unshod	0.1	1.3709	-201.643	31.03	1320.8	1336.46	0.0234933
714	501.21	Left	2	R-L	Unshod	0.15	1.40685	-278.422	75.864	1801.62	1824.58	0.0421088
714	501.21	Left	2	R-L	Unshod	0.2	1.4428	-294.37	99.374	2111.55	2134.28	0.0470622
714	501.21	Left	2	R-L	Unshod	0.25	1.47875	-305.425	123.938	2394.76	2417.34	0.0517537
714	501.21	Left	2	R-L	Unshod	0.3	1.5147	-285.939	143.767	2560.13	2580.06	0.056156
714	501.21	Left	2	R-L	Unshod	0.35	1.55065	-220.44	159.61	2613.94	2628.07	0.061061
714	501.21	Left	2	R-L	Unshod	0.4	1.5866	-149.905	177.163	2644.91	2655.07	0.0669827
714	501.21	Left	2	R-L	Unshod	0.45	1.62255	-79.654	182.651	2713.41	2720.72	0.0673141
714	501.21	Left	2	R-L	Unshod	0.5	1.6585	-13.804	159.055	2830.09	2834.59	0.0562014
714	501.21	Left	2	R-L	Unshod	0.55	1.69445	70.532	134.842	2998.57	3002.43	0.0449688
714	501.21	Left	2	R-L	Unshod	0.6	1.7304	189.532	90.729	3106.17	3113.27	0.0292093
714	501.21	Left	2	R-L	Unshod	0.65	1.76635	293.624	53.684	3046.55	3061.14	0.0176212
714	501.21	Left	2	R-L	Unshod	0.7	1.8023	372.394	25.72	2819.52	2844.13	0.00912211
714	501.21	Left	2	R-L	Unshod	0.75	1.83825	379.04	17.674	2410.89	2440.57	0.0073309
714	501.21	Left	2	R-L	Unshod	0.8	1.8742	306.108	26.012	1893.98	1918.73	0.013734
714	501.21	Left	2	R-L	Unshod	0.85	1.91015	256.729	2.243	1456.74	1479.19	0.00153974
714	501.21	Left	2	R-L	Unshod	0.9	1.9461	207.024	-28.72	1102.88	1122.51	0.026041
714	501.21	Left	2	R-L	Unshod	0.95	1.98205	175.955	-46.52	685.973	709.706	0.0678161
714	501.21	Left	2	R-L	Unshod	1	2.018	2.31	0.17	5.43	5.90338	0.0313076
714	501.21	Left	3	R-L	Unshod	0	2.769	-178.503	-41.318	502.114	534.499	0.0822881	2934.17	2180	0.573733	0.426267
714	501.21	Left	3	R-L	Unshod	0.05	2.80775	-173.992	25.556	686.573	708.737	0.0372226
714	501.21	Left	3	R-L	Unshod	0.1	2.8465	-237.836	16.284	1369.78	1390.37	0.011888
714	501.21	Left	3	R-L	Unshod	0.15	2.88525	-306.079	66.804	1796.77	1823.87	0.0371801
714	501.21	Left	3	R-L	Unshod	0.2	2.924	-328.956	99.193	2168.26	2195.31	0.0457478
714	501.21	Left	3	R-L	Unshod	0.25	2.96275	-345.162	109.113	2455.68	2482.22	0.0444329
714	501.21	Left	3	R-L	Unshod	0.3	3.0015	-331.331	121.313	2655.57	2678.91	0.0456825
714	501.21	Left	3	R-L	Unshod	0.35	3.04025	-272.984	145.776	2720.5	2738.05	0.0535842
714	501.21	Left	3	R-L	Unshod	0.4	3.079	-199.285	173.237	2737.89	2750.6	0.0632738
714	501.21	Left	3	R-L	Unshod	0.45	3.11775	-128.945	178.776	2780.85	2789.57	0.0642883
714	501.21	Left	3	R-L	Unshod	0.5	3.1565	-54.15	162.865	2809.37	2814.61	0.0579721
714	501.21	Left	3	R-L	Unshod	0.55	3.19525	16.983	133.141	2877.42	2880.54	0.046271
714	501.21	Left	3	R-L	Unshod	0.6	3.234	91.269	110.103	2933.4	2936.89	0.0375342
714	501.21	Left	3	R-L	Unshod	0.65	3.27275	187.593	91.044	2881.34	2888.87	0.0315978
714	501.21	Left	3	R-L	Unshod	0.7	3.3115	265.826	76.676	2681.37	2695.6	0.0285959
714	501.21	Left	3	R-L	Unshod	0.75	3.35025	288.835	76.724	2318.78	2337.96	0.0330881
714	501.21	Left	3	R-L	Unshod	0.8	3.389	248.989	75.368	1909.3	1926.94	0.0394742
714	501.21	Left	3	R-L	Unshod	0.85	3.42775	184.975	44.01	1441.6	1454.09	0.0305286
714	501.21	Left	3	R-L	Unshod	0.9	3.4665	154.351	3.935	1089.93	1100.81	0.00361033
714	501.21	Left	3	R-L	Unshod	0.95	3.50525	148.216	-25.522	666.96	683.707	0.0382662
714	501.21	Left	3	R-L	Unshod	1	3.544	5.825	-3.07	11.235	13.0223	0.273253
714	501.21	Left	4	R-L	Unshod	0	3.336	-122.659	-18.432	539.523	553.597	0.0341635	2890.9	2294	0.557561	0.442439
714	501.21	Left	4	R-L	Unshod	0.05	3.37675	-129.727	27.44	625.513	639.413	0.043868
714	501.21	Left	4	R-L	Unshod	0.1	3.4175	-197.452	31.971	1252.29	1268.16	0.02553
714	501.21	Left	4	R-L	Unshod	0.15	3.45825	-299.173	102.877	1821.37	1848.65	0.0564832
714	501.21	Left	4	R-L	Unshod	0.2	3.499	-320.76	117.319	2182.5	2209.07	0.0537543
714	501.21	Left	4	R-L	Unshod	0.25	3.53975	-309.772	137.967	2362.08	2386.3	0.0584091
714	501.21	Left	4	R-L	Unshod	0.3	3.5805	-276.545	154.049	2477.3	2497.45	0.0621841
714	501.21	Left	4	R-L	Unshod	0.35	3.62125	-216.643	165.013	2474.26	2489.21	0.0666917
714	501.21	Left	4	R-L	Unshod	0.4	3.662	-149.765	178.848	2496.18	2507.06	0.0716485
714	501.21	Left	4	R-L	Unshod	0.45	3.70275	-82.464	177.424	2586.15	2593.54	0.0686056
714	501.21	Left	4	R-L	Unshod	0.5	3.7435	-6.729	158.13	2680.93	2685.6	0.0589832
714	501.21	Left	4	R-L	Unshod	0.55	3.78425	74.994	141.392	2760.05	2764.69	0.051228
714	501.21	Left	4	R-L	Unshod	0.6	3.825	159.916	120.257	2849.76	2856.78	0.0421989
714	501.21	Left	4	R-L	Unshod	0.65	3.86575	262.262	89.526	2889.71	2902.96	0.030981
714	501.21	Left	4	R-L	Unshod	0.7	3.9065	345.137	64.562	2798.1	2820.04	0.0230735
714	501.21	Left	4	R-L	Unshod	0.75	3.94725	388.363	55.729	2534.78	2564.97	0.0219857
714	501.21	Left	4	R-L	Unshod	0.8	3.988	347.837	48.055	2086.61	2115.95	0.0230302
714	501.21	Left	4	R-L	Unshod	0.85	4.02875	258.863	14.72	1546.78	1568.36	0.00951657
714	501.21	Left	4	R-L	Unshod	0.9	4.0695	202.569	-18.327	1145.88	1163.79	0.0159939
714	501.21	Left	4	R-L	Unshod	0.95	4.11025	147.169	-45.531	628.01	646.628	0.0725004
714	501.21	Left	4	R-L	Unshod	1	4.151	1.458	0.626	5.019	5.26384	0.124726
714	501.21	Right	2	L-R	Unshod	0	2.521	122.77	-16.827	487.162	502.675	0.0345409	3097.93	2340	0.569689	0.430311
714	501.21	Right	2	L-R	Unshod	0.05	2.5627	177.485	47.497	668.444	693.235	0.0710561
714	501.21	Right	2	L-R	Unshod	0.1	2.6044	205.681	51.333	1215.43	1233.78	0.0422345
714	501.21	Right	2	L-R	Unshod	0.15	2.6461	314.706	95.582	1882.76	1911.27	0.0507671
714	501.21	Right	2	L-R	Unshod	0.2	2.6878	329.427	98.929	2177	2204.01	0.0454428
714	501.21	Right	2	L-R	Unshod	0.25	2.7295	305.127	104.1	2276.21	2298.93	0.0457339
714	501.21	Right	2	L-R	Unshod	0.3	2.7712	247.835	110.789	2288.54	2304.59	0.0484103
714	501.21	Right	2	L-R	Unshod	0.35	2.8129	180.678	116.907	2274.76	2284.92	0.051393
714	501.21	Right	2	L-R	Unshod	0.4	2.8546	116.454	128.47	2327.59	2334.04	0.0551945
714	501.21	Right	2	L-R	Unshod	0.45	2.8963	45.407	135.501	2509.61	2513.67	0.0539929
714	501.21	Right	2	L-R	Unshod	0.5	2.938	-26.537	132.568	2713.25	2716.61	0.0488595
714	501.21	Right	2	L-R	Unshod	0.55	2.9797	-107.362	122.658	2914.38	2918.93	0.0420872
714	501.21	Right	2	L-R	Unshod	0.6	3.0214	-216.772	107.496	3082.07	3091.55	0.0348779
714	501.21	Right	2	L-R	Unshod	0.65	3.0631	-317.082	96.194	3063	3080.87	0.0314052
714	501.21	Right	2	L-R	Unshod	0.7	3.1048	-389.037	90.873	2871.16	2898.82	0.0316502
714	501.21	Right	2	L-R	Unshod	0.75	3.1465	-395.933	93.603	2472.01	2505.27	0.0378651
714	501.21	Right	2	L-R	Unshod	0.8	3.1882	-350.68	88.367	2054.29	2085.88	0.0430158
714	501.21	Right	2	L-R	Unshod	0.85	3.2299	-318.947	43.271	1670.98	1701.7	0.0258955
714	501.21	Right	2	L-R	Unshod	0.9	3.2716	-252.032	3.49	1213.08	1238.99	0.00287696
714	501.21	Right	2	L-R	Unshod	0.95	3.3133	-182.892	-16.514	719.447	742.513	0.0229537
714	501.21	Right	2	L-R	Unshod	1	3.355	-1.397	1.02	2	2.64424	0.51
714	501.21	Right	3	R-L	Unshod	0	1.132	-157.24	-13.26	633.573	652.928	0.0209289	3132.42	2360	0.570317	0.429683
714	501.21	Right	3	R-L	Unshod	0.05	1.1712	-173.732	-67.522	774.567	796.678	0.0871739
714	501.21	Right	3	R-L	Unshod	0.1	1.2104	-225.033	-22.665	1490.72	1507.78	0.0152041
714	501.21	Right	3	R-L	Unshod	0.15	1.2496	-266.722	-90.783	1855.77	1877.04	0.0489192
714	501.21	Right	3	R-L	Unshod	0.2	1.2888	-280.13	-105.631	2110.8	2131.93	0.050043
714	501.21	Right	3	R-L	Unshod	0.25	1.328	-252.964	-121.701	2187.28	2205.22	0.0556404
714	501.21	Right	3	R-L	Unshod	0.3	1.3672	-218.574	-132.283	2231.7	2246.27	0.0592747
714	501.21	Right	3	R-L	Unshod	0.35	1.4064	-158.175	-144.652	2251.75	2261.93	0.0642398
714	501.21	Right	3	R-L	Unshod	0.4	1.4456	-93.544	-154.74	2349.76	2356.71	0.0658535
714	501.21	Right	3	R-L	Unshod	0.45	1.4848	-31.049	-161.074	2516.19	2521.53	0.0640151
714	501.21	Right	3	R-L	Unshod	0.5	1.524	50.878	-151.342	2740.86	2745.51	0.0552169
714	501.21	Right	3	R-L	Unshod	0.55	1.5632	144.466	-135.762	2965.72	2972.34	0.045777
714	501.21	Right	3	R-L	Unshod	0.6	1.6024	249.664	-115.231	3118.96	3131.06	0.0369453
714	501.21	Right	3	R-L	Unshod	0.65	1.6416	356.205	-106.035	3077.46	3099.82	0.0344553
714	501.21	Right	3	R-L	Unshod	0.7	1.6808	423.716	-106.388	2827.31	2860.87	0.0376286
714	501.21	Right	3	R-L	Unshod	0.75	1.72	412.557	-115.819	2397.41	2435.4	0.0483101
714	501.21	Right	3	R-L	Unshod	0.8	1.7592	357.399	-111.393	1982.33	2017.37	0.056193
714	501.21	Right	3	R-L	Unshod	0.85	1.7984	326.541	-66.954	1580.27	1615.04	0.0423688
714	501.21	Right	3	R-L	Unshod	0.9	1.8376	258.125	-6.143	1182.77	1210.62	0.00519376
714	501.21	Right	3	R-L	Unshod	0.95	1.8768	185.353	17.497	668.454	693.897	0.0261753
714	501.21	Right	3	R-L	Unshod	1	1.916	-0.317	-1.229	-3.642	3.85682	0.337452
714	501.21	Right	6	L-R	Unshod	0	1.411	141.354	-29.269	700.848	715.56	0.0417623	3022.23	2292	0.568705	0.431295
714	501.21	Right	6	L-R	Unshod	0.05	1.44705	146.86	27.253	768.741	783.118	0.0354515
714	501.21	Right	6	L-R	Unshod	0.1	1.4831	224.889	20.1	1467.28	1484.55	0.0136988
714	501.21	Right	6	L-R	Unshod	0.15	1.51915	301.085	35.016	1927.31	1951	0.0181683
714	501.21	Right	6	L-R	Unshod	0.2	1.5552	323.514	64.764	2254.52	2278.53	0.0287263
714	501.21	Right	6	L-R	Unshod	0.25	1.59125	309.552	80.741	2413.89	2435	0.0334485
714	501.21	Right	6	L-R	Unshod	0.3	1.6273	268.082	90.684	2473.93	2490.06	0.0366559
714	501.21	Right	6	L-R	Unshod	0.35	1.66335	200.637	109.893	2489.04	2499.53	0.0441507
714	501.21	Right	6	L-R	Unshod	0.4	1.6994	129.276	127.611	2544.17	2550.65	0.0501582
714	501.21	Right	6	L-R	Unshod	0.45	1.73545	53.557	126.627	2662.94	2666.48	0.0475516
714	501.21	Right	6	L-R	Unshod	0.5	1.7715	-13.138	110.057	2806.26	2808.45	0.0392184
714	501.21	Right	6	L-R	Unshod	0.55	1.80755	-94.198	94.204	2952.31	2955.31	0.0319086
714	501.21	Right	6	L-R	Unshod	0.6	1.8436	-182.795	81.487	3020.28	3026.9	0.02698
714	501.21	Right	6	L-R	Unshod	0.65	1.87965	-266.462	71.132	2959.04	2971.87	0.0240388
714	501.21	Right	6	L-R	Unshod	0.7	1.9157	-333.834	72.448	2713.57	2734.99	0.0266984
714	501.21	Right	6	L-R	Unshod	0.75	1.95175	-334.12	84.096	2365.68	2390.63	0.0355484
714	501.21	Right	6	L-R	Unshod	0.8	1.9878	-295.257	91.771	1968.07	1992.2	0.0466301
714	501.21	Right	6	L-R	Unshod	0.85	2.02385	-276.09	56.188	1605.49	1630.02	0.0349975
714	501.21	Right	6	L-R	Unshod	0.9	2.0599	-233.469	12.192	1260.14	1281.65	0.00967509
714	501.21	Right	6	L-R	Unshod	0.95	2.09595	-201.8	-9.986	735.295	762.549	0.0135809
714	501.21	Right	6	L-R	Unshod	1	2.132	-0.346	0.308	1.771	1.83058	0.173913
528	585.13	Left	1	R-L	Unshod	0	4.016	-4.828	1.082	19.809	20.4176	0.0546216	3959	2767	0.588611	0.411389
528	585.13	Left	1	R-L	Unshod	0.05	4.0602	26.186	40.985	207.319	212.948	0.197691
528	585.13	Left	1	R-L	Unshod	0.1	4.1044	-197.556	49.092	956.714	978.131	0.0513131
528	585.13	Left	1	R-L	Unshod	0.15	4.1486	-337.743	108.562	1915.48	1948.05	0.0566762
528	585.13	Left	1	R-L	Unshod	0.2	4.1928	-467.886	141.405	2706.96	2750.73	0.0522376
528	585.13	Left	1	R-L	Unshod	0.25	4.237	-495.827	188.757	3179.72	3223.68	0.0593627
528	585.13	Left	1	R-L	Unshod	0.3	4.2812	-427.03	204.386	3275.16	3309.2	0.0624049
528	585.13	Left	1	R-L	Unshod	0.35	4.3254	-313.359	189.371	3156.85	3178.01	0.0599873
528	585.13	Left	1	R-L	Unshod	0.4	4.3696	-217.988	172.503	3067.87	3080.44	0.0562289
528	585.13	Left	1	R-L	Unshod	0.45	4.4138	-122.304	147.221	3116.57	3122.44	0.0472382
528	585.13	Left	1	R-L	Unshod	0.5	4.458	-22.392	138.495	3319.68	3322.65	0.0417193
528	585.13	Left	1	R-L	Unshod	0.55	4.5022	97.845	102.827	3734.37	3737.07	0.0275353
528	585.13	Left	1	R-L	Unshod	0.6	4.5464	265.023	79.302	4067.47	4076.87	0.0194966
528	585.13	Left	1	R-L	Unshod	0.65	4.5906	416.971	55.27	4014.1	4036.08	0.013769
528	585.13	Left	1	R-L	Unshod	0.7	4.6348	496.776	27.546	3648.07	3681.84	0.00755084
528	585.13	Left	1	R-L	Unshod	0.75	4.679	536.614	19.155	3074.63	3121.17	0.00623001
528	585.13	Left	1	R-L	Unshod	0.8	4.7232	444.614	31.084	2252.99	2296.65	0.0137968
528	585.13	Left	1	R-L	Unshod	0.85	4.7674	276.278	7.931	1412.41	1439.2	0.00561521
528	585.13	Left	1	R-L	Unshod	0.9	4.8116	184.439	-8.333	928.336	946.517	0.00897628
528	585.13	Left	1	R-L	Unshod	0.95	4.8558	61.081	-30.679	234.519	244.277	0.130817
528	585.13	Left	1	R-L	Unshod	1	4.9	0.942	0.449	1.563	1.87934	0.287268
528	585.13	Left	2	R-L	Unshod	0	4.73	23.173	-17.221	80.435	85.4596	0.214098	4181.86	2840	0.595549	0.404451
528	585.13	Left	2	R-L	Unshod	0.05	4.7789	44.579	-60.782	106.362	130.363	0.571463
528	585.13	Left	2	R-L	Unshod	0.1	4.8278	-110.317	-7.921	755.035	763.093	0.0104909
528	585.13	Left	2	R-L	Unshod	0.15	4.8767	-284.627	37.169	1655.15	1679.85	0.0224566
528	585.13	Left	2	R-L	Unshod	0.2	4.9256	-376.638	72.938	2352.31	2383.38	0.031007
528	585.13	Left	2	R-L	Unshod	0.25	4.9745	-399.106	113.921	2742	2773.23	0.0415467
528	585.13	Left	2	R-L	Unshod	0.3	5.0234	-352.396	138.649	2898.36	2923	0.047837
528	585.13	Left	2	R-L	Unshod	0.35	5.0723	-276.12	133.785	3038.92	3054.37	0.0440239
528	585.13	Left	2	R-L	Unshod	0.4	5.1212	-186.405	142.985	3107.31	3116.18	0.0460156
528	585.13	Left	2	R-L	Unshod	0.45	5.1701	-92.296	146.512	3255.6	3260.2	0.0450031
528	585.13	Left	2	R-L	Unshod	0.5	5.219	-6.564	140.835	3497.51	3500.35	0.0402672
528	585.13	Left	2	R-L	Unshod	0.55	5.2679	111.463	126.298	3754.95	3758.73	0.033635
528	585.13	Left	2	R-L	Unshod	0.6	5.3168	247.622	132.613	3756.61	3767.09	0.0353013
528	585.13	Left	2	R-L	Unshod	0.65	5.3657	342.31	121.823	3383.83	3403.28	0.0360015
528	585.13	Left	2	R-L	Unshod	0.7	5.4146	386.723	105.469	2953.3	2980.38	0.0357123
528	585.13	Left	2	R-L	Unshod	0.75	5.4635	424.096	103.028	2558.14	2595.11	0.0402745
528	585.13	Left	2	R-L	Unshod	0.8	5.5124	331.957	73.879	1911.87	1941.88	0.0386423
528	585.13	Left	2	R-L	Unshod	0.85	5.5613	215.319	45.99	1342.31	1360.25	0.0342617
528	585.13	Left	2	R-L	Unshod	0.9	5.6102	159.899	21.022	919.863	933.894	0.0228534
528	585.13	Left	2	R-L	Unshod	0.95	5.6591	80.754	-7.457	431.382	438.939	0.0172863
528	585.13	Left	2	R-L	Unshod	1	5.708	0.859	-0.063	3.128	3.24442	0.0201407
528	585.13	Left	3	L-R	Unshod	0	3.074	-8.089	5.219	36.329	37.5828	0.143659	3831.54	2745	0.582608	0.417392
528	585.13	Left	3	L-R	Unshod	0.05	3.1148	-30.953	-15.636	113.549	118.726	0.137703
528	585.13	Left	3	L-R	Unshod	0.1	3.1556	139.696	-34.689	978.606	989.135	0.0354474
528	585.13	Left	3	L-R	Unshod	0.15	3.1964	335.726	-158.907	1826.15	1863.55	0.0870173
528	585.13	Left	3	L-R	Unshod	0.2	3.2372	442.683	-227.609	2523.66	2572.28	0.0901901
528	585.13	Left	3	L-R	Unshod	0.25	3.278	498.483	-308.657	3009.38	3065.96	0.102565
528	585.13	Left	3	L-R	Unshod	0.3	3.3188	479.289	-330.66	3241.35	3293.23	0.102013
528	585.13	Left	3	L-R	Unshod	0.35	3.3596	382.917	-319.298	3247.7	3285.74	0.0983152
528	585.13	Left	3	L-R	Unshod	0.4	3.4004	252.279	-296.856	3121.97	3146.19	0.095086
528	585.13	Left	3	L-R	Unshod	0.45	3.4412	159.97	-273.858	3103.86	3120.02	0.0882314
528	585.13	Left	3	L-R	Unshod	0.5	3.482	72.715	-277.082	3258.77	3271.33	0.0850266
528	585.13	Left	3	L-R	Unshod	0.55	3.5228	-20.266	-277.868	3618.65	3629.36	0.0767878
528	585.13	Left	3	L-R	Unshod	0.6	3.5636	-159.278	-265.453	4009.45	4021.39	0.0662068
528	585.13	Left	3	L-R	Unshod	0.65	3.6044	-311.934	-264.204	4149.52	4169.6	0.063671
528	585.13	Left	3	L-R	Unshod	0.7	3.6452	-438.607	-236.43	3898.74	3930.45	0.0606427
528	585.13	Left	3	L-R	Unshod	0.75	3.686	-483.812	-198.874	3372.23	3412.56	0.058974
528	585.13	Left	3	L-R	Unshod	0.8	3.7268	-462.575	-158.198	2651.68	2696.37	0.0596596
528	585.13	Left	3	L-R	Unshod	0.85	3.7676	-287.918	-110.197	1732.5	1759.72	0.0636057
528	585.13	Left	3	L-R	Unshod	0.9	3.8084	-199.493	-53.262	1191.65	1209.4	0.0446961
528	585.13	Left	3	L-R	Unshod	0.95	3.8492	-130.731	25.326	646.188	659.766	0.0391929
528	585.13	Left	3	L-R	Unshod	1	3.89	3.026	-3.475	4	6.10183	0.86875
528	585.13	Left	4	R-L	Unshod	0	3.083	16.549	5.133	63.921	66.2277	0.0803022	4144.5	2822	0.594918	0.405082
528	585.13	Left	4	R-L	Unshod	0.05	3.1271	10.33	25.372	176.174	178.291	0.144017
528	585.13	Left	4	R-L	Unshod	0.1	3.1712	-93.818	33.549	1072.06	1076.68	0.031294
528	585.13	Left	4	R-L	Unshod	0.15	3.2153	-291.008	122.723	1891.38	1917.56	0.0648856
528	585.13	Left	4	R-L	Unshod	0.2	3.2594	-345.926	177.922	2512.3	2542.23	0.0708204
528	585.13	Left	4	R-L	Unshod	0.25	3.3035	-395.787	212.792	3021.59	3054.82	0.0704238
528	585.13	Left	4	R-L	Unshod	0.3	3.3476	-361.863	232.985	3288.58	3316.62	0.0708466
528	585.13	Left	4	R-L	Unshod	0.35	3.3917	-271.804	227.173	3289.27	3308.29	0.0690648
528	585.13	Left	4	R-L	Unshod	0.4	3.4358	-169.401	216.905	3127.26	3139.34	0.0693596
528	585.13	Left	4	R-L	Unshod	0.45	3.4799	-89.097	195.733	3019.1	3026.75	0.0648316
528	585.13	Left	4	R-L	Unshod	0.5	3.524	-3.551	175.433	3078.44	3083.44	0.0569876
528	585.13	Left	4	R-L	Unshod	0.55	3.5681	92.496	156.092	3354.17	3359.07	0.0465367
528	585.13	Left	4	R-L	Unshod	0.6	3.6122	228.556	135.249	3704.22	3713.72	0.0365122
528	585.13	Left	4	R-L	Unshod	0.65	3.6563	370.199	115.921	3841.63	3861.17	0.0301749
528	585.13	Left	4	R-L	Unshod	0.7	3.7004	477.113	87.058	3680.43	3712.24	0.0236543
528	585.13	Left	4	R-L	Unshod	0.75	3.7445	532.04	65.217	3322.55	3365.51	0.0196286
528	585.13	Left	4	R-L	Unshod	0.8	3.7886	500.759	56.041	2647.39	2694.92	0.0211684
528	585.13	Left	4	R-L	Unshod	0.85	3.8327	269.731	53.133	1678.64	1701	0.0316525
528	585.13	Left	4	R-L	Unshod	0.9	3.8768	196.47	2.743	1129.52	1146.48	0.00242847
528	585.13	Left	4	R-L	Unshod	0.95	3.9209	102.824	-28.752	458.983	471.238	0.0626428
528	585.13	Left	4	R-L	Unshod	1	3.965	0.313	0.877	3.474	3.59663	0.252447
528	585.13	Right	1	L-R	Unshod	0	1.156	-19.417	-24.344	223.81	225.966	0.108771	3998.75	2749	0.592605	0.407395
528	585.13	Right	1	L-R	Unshod	0.05	1.19465	233.548	9.4	873.095	903.841	0.0107663
528	585.13	Right	1	L-R	Unshod	0.1	1.2333	262.458	65.791	1608.42	1631.02	0.0409041
528	585.13	Right	1	L-R	Unshod	0.15	1.27195	419.782	162.062	2444.38	2485.46	0.0662998
528	585.13	Right	1	L-R	Unshod	0.2	1.3106	444.845	186.326	2923.31	2962.82	0.0637381
528	585.13	Right	1	L-R	Unshod	0.25	1.34925	458.864	184.017	3224.99	3262.67	0.0570597
528	585.13	Right	1	L-R	Unshod	0.3	1.3879	392.843	167.539	3322.35	3349.68	0.0504279
528	585.13	Right	1	L-R	Unshod	0.35	1.42655	289.227	146.344	3259.81	3275.89	0.0448934
528	585.13	Right	1	L-R	Unshod	0.4	1.4652	186.086	127.01	3271.31	3279.06	0.0388254
528	585.13	Right	1	L-R	Unshod	0.45	1.50385	85.938	115.71	3421.33	3424.37	0.0338201
528	585.13	Right	1	L-R	Unshod	0.5	1.5425	-20.773	75.338	3816.72	3817.52	0.0197389
528	585.13	Right	1	L-R	Unshod	0.55	1.58115	-163.613	36.377	4155.94	4159.32	0.00875302
528	585.13	Right	1	L-R	Unshod	0.6	1.6198	-289.246	22.637	4149.94	4160.07	0.00545478
528	585.13	Right	1	L-R	Unshod	0.65	1.65845	-390.223	-7.551	3790.56	3810.6	0.00199205
528	585.13	Right	1	L-R	Unshod	0.7	1.6971	-439.825	-20.948	3181.32	3211.65	0.00658469
528	585.13	Right	1	L-R	Unshod	0.75	1.73575	-446.684	-27.325	2619.89	2657.84	0.0104298
528	585.13	Right	1	L-R	Unshod	0.8	1.7744	-377.197	-15.435	2017.13	2052.15	0.00765198
528	585.13	Right	1	L-R	Unshod	0.85	1.81305	-193.971	14.272	1247.12	1262.2	0.011444
528	585.13	Right	1	L-R	Unshod	0.9	1.8517	-106.45	-11.003	816.192	823.178	0.0134809
528	585.13	Right	1	L-R	Unshod	0.95	1.89035	-25.391	-62.248	352.142	358.502	0.17677
528	585.13	Right	1	L-R	Unshod	1	1.929	-1.501	1.127	5	5.34071	0.2254
528	585.13	Right	2	L-R	Unshod	0	1.89	-32.443	40.605	189.779	196.767	0.213959	4135.87	2912	0.586826	0.413174
528	585.13	Right	2	L-R	Unshod	0.05	1.93435	160.247	20.292	659.808	679.292	0.0307544
528	585.13	Right	2	L-R	Unshod	0.1	1.9787	199.831	28.295	1413.95	1428.28	0.0200113
528	585.13	Right	2	L-R	Unshod	0.15	2.02305	377.654	101.073	2040.77	2077.88	0.0495269
528	585.13	Right	2	L-R	Unshod	0.2	2.0674	432.725	135.313	2526.82	2567.18	0.0535507
528	585.13	Right	2	L-R	Unshod	0.25	2.11175	437.11	132.32	2786.1	2823.29	0.0474929
528	585.13	Right	2	L-R	Unshod	0.3	2.1561	404.538	143.401	2985.86	3016.55	0.0480267
528	585.13	Right	2	L-R	Unshod	0.35	2.20045	320.953	162.532	3051.04	3072.18	0.053271
528	585.13	Right	2	L-R	Unshod	0.4	2.2448	237.667	175.904	3102.99	3117.05	0.0566885
528	585.13	Right	2	L-R	Unshod	0.45	2.28915	148.304	176.058	3249.22	3257.37	0.0541846
528	585.13	Right	2	L-R	Unshod	0.5	2.3335	56.105	163.446	3471.71	3476.01	0.0470793
528	585.13	Right	2	L-R	Unshod	0.55	2.37785	-56.596	153.509	3722.9	3726.49	0.0412337
528	585.13	Right	2	L-R	Unshod	0.6	2.4222	-180.585	143.503	3757.37	3764.44	0.0381924
528	585.13	Right	2	L-R	Unshod	0.65	2.46655	-281.404	124.56	3503.04	3516.53	0.0355577
528	585.13	Right	2	L-R	Unshod	0.7	2.5109	-354.404	102.864	3181.84	3203.16	0.0323285
528	585.13	Right	2	L-R	Unshod	0.75	2.55525	-405.936	91.982	2825.64	2856.14	0.0325526
528	585.13	Right	2	L-R	Unshod	0.8	2.5996	-371.445	71.097	2219.16	2251.15	0.0320379
528	585.13	Right	2	L-R	Unshod	0.85	2.64395	-158.395	59.665	1302.88	1313.82	0.0457949
528	585.13	Right	2	L-R	Unshod	0.9	2.6883	-76.131	24.163	805.833	809.782	0.0299851
528	585.13	Right	2	L-R	Unshod	0.95	2.73265	-35.56	-45.155	381.827	386.129	0.11826
528	585.13	Right	2	L-R	Unshod	1	2.777	-3.694	-0.24	5	6.22119	0.048
528	585.13	Right	3	R-L	Unshod	0	2.442	16.853	-8.861	113.957	115.537	0.0777574	4026.35	2851	0.585451	0.414549
528	585.13	Right	3	R-L	Unshod	0.05	2.4799	-193.353	-25.279	790.257	813.96	0.0319883
528	585.13	Right	3	R-L	Unshod	0.1	2.5178	-325.883	-58.774	1784.96	1815.41	0.0329274
528	585.13	Right	3	R-L	Unshod	0.15	2.5557	-456.915	-170.174	2486.23	2533.59	0.0684465
528	585.13	Right	3	R-L	Unshod	0.2	2.5936	-514.04	-199.6	3038.33	3087.97	0.065694
528	585.13	Right	3	R-L	Unshod	0.25	2.6315	-518.26	-205.547	3350.84	3396.91	0.0613419
528	585.13	Right	3	R-L	Unshod	0.3	2.6694	-444.485	-204.267	3334.24	3369.93	0.0612634
528	585.13	Right	3	R-L	Unshod	0.35	2.7073	-336.523	-205.956	3185.46	3209.8	0.064655
528	585.13	Right	3	R-L	Unshod	0.4	2.7452	-244.433	-193.006	3138.66	3154.07	0.0614931
528	585.13	Right	3	R-L	Unshod	0.45	2.7831	-158.894	-188.479	3273.87	3283.14	0.0575707
528	585.13	Right	3	R-L	Unshod	0.5	2.821	-50.898	-177.224	3585.2	3589.94	0.0494321
528	585.13	Right	3	R-L	Unshod	0.55	2.8589	64.06	-135.723	3936.61	3939.47	0.0344772
528	585.13	Right	3	R-L	Unshod	0.6	2.8968	233.931	-94.233	4153.79	4161.44	0.022686
528	585.13	Right	3	R-L	Unshod	0.65	2.9347	366.217	-62.872	4019.55	4036.69	0.0156415
528	585.13	Right	3	R-L	Unshod	0.7	2.9726	449.041	-35.686	3491.71	3520.65	0.0102202
528	585.13	Right	3	R-L	Unshod	0.75	3.0105	418.21	-40.201	2691.61	2724.21	0.0149356
528	585.13	Right	3	R-L	Unshod	0.8	3.0484	271.953	-56.718	1922.24	1942.22	0.0295061
528	585.13	Right	3	R-L	Unshod	0.85	3.0863	141.3	-38.851	1274.21	1282.61	0.0304903
528	585.13	Right	3	R-L	Unshod	0.9	3.1242	102.03	-0.476	905.087	910.82	0.000525916
528	585.13	Right	3	R-L	Unshod	0.95	3.1621	62.292	48.543	462.064	468.764	0.105057
528	585.13	Right	3	R-L	Unshod	1	3.2	2.644	-1.407	3.559	4.65154	0.395336
576A	555.65	Left	2	L-R	Unshod	0	2.169	-2.093	1.725	50	50.0735	0.0345	4077.89	2745	0.597678	0.402322
576A	555.65	Left	2	L-R	Unshod	0.05	2.20835	130.625	-9.007	460.227	478.49	0.0195708
576A	555.65	Left	2	L-R	Unshod	0.1	2.2477	171.082	-29.71	1021.64	1036.29	0.0290806
576A	555.65	Left	2	L-R	Unshod	0.15	2.28705	393.903	-100.513	1820.38	1865.22	0.0552153
576A	555.65	Left	2	L-R	Unshod	0.2	2.3264	450.249	-148.386	2329.96	2377.7	0.0636861
576A	555.65	Left	2	L-R	Unshod	0.25	2.36575	456.51	-160.861	2679.78	2723.14	0.0600277
576A	555.65	Left	2	L-R	Unshod	0.3	2.4051	425.239	-166.141	2928.48	2963.85	0.0567328
576A	555.65	Left	2	L-R	Unshod	0.35	2.44445	366.295	-178.863	2955.09	2983.07	0.0605272
576A	555.65	Left	2	L-R	Unshod	0.4	2.4838	279.602	-190.166	2946.78	2966.12	0.0645335
576A	555.65	Left	2	L-R	Unshod	0.45	2.52315	182.677	-204.679	2964.93	2977.59	0.0690334
576A	555.65	Left	2	L-R	Unshod	0.5	2.5625	83.803	-204.437	3056.82	3064.79	0.0668791
576A	555.65	Left	2	L-R	Unshod	0.55	2.60185	-23.316	-190.77	3207.21	3212.96	0.0594817
576A	555.65	Left	2	L-R	Unshod	0.6	2.6412	-143.891	-182.673	3292.11	3300.32	0.055488
576A	555.65	Left	2	L-R	Unshod	0.65	2.68055	-262.21	-166.063	3201.64	3216.65	0.0518681
576A	555.65	Left	2	L-R	Unshod	0.7	2.7199	-340.095	-147.688	2986.21	3009.14	0.0494566
576A	555.65	Left	2	L-R	Unshod	0.75	2.75925	-388.437	-130.984	2636.18	2667.87	0.049687
576A	555.65	Left	2	L-R	Unshod	0.8	2.7986	-386.734	-124.806	2203.44	2240.6	0.0566414
576A	555.65	Left	2	L-R	Unshod	0.85	2.83795	-337.433	-113.686	1715.1	1751.67	0.0662855
576A	555.65	Left	2	L-R	Unshod	0.9	2.8773	-172.785	-76.51	1127.7	1143.42	0.0678462
576A	555.65	Left	2	L-R	Unshod	0.95	2.91665	-199.132	-30.59	752.585	779.085	0.0406466
576A	555.65	Left	2	L-R	Unshod	1	2.956	3.033	-1.203	5	5.97045	0.2406
576A	555.65	Left	3	L-R	Unshod	0	4.32	-13.666	-2.288	166.423	166.999	0.0137481	4087.59	2821	0.591668	0.408332
576A	555.65	Left	3	L-R	Unshod	0.05	4.3598	174.982	-13.702	597.588	622.831	0.0229288
576A	555.65	Left	3	L-R	Unshod	0.1	4.3996	265.824	-53.587	1257.17	1286.09	0.042625
576A	555.65	Left	3	L-R	Unshod	0.15	4.4394	435.883	-113.553	2018.32	2067.97	0.0562612
576A	555.65	Left	3	L-R	Unshod	0.2	4.4792	475.213	-151.456	2488.38	2537.87	0.0608653
576A	555.65	Left	3	L-R	Unshod	0.25	4.519	454.534	-150.289	2786.49	2827.32	0.0539348
576A	555.65	Left	3	L-R	Unshod	0.3	4.5588	402.189	-144.416	2895.06	2926.43	0.0498835
576A	555.65	Left	3	L-R	Unshod	0.35	4.5986	327.457	-163.165	2842.12	2865.57	0.0574096
576A	555.65	Left	3	L-R	Unshod	0.4	4.6384	231.341	-170.68	2816.73	2831.36	0.0605951
576A	555.65	Left	3	L-R	Unshod	0.45	4.6782	140.842	-167.769	2877.07	2885.39	0.0583125
576A	555.65	Left	3	L-R	Unshod	0.5	4.718	36.329	-161.181	3059.1	3063.56	0.052689
576A	555.65	Left	3	L-R	Unshod	0.55	4.7578	-84.627	-140.541	3239.12	3243.27	0.0433886
576A	555.65	Left	3	L-R	Unshod	0.6	4.7976	-210.787	-126.488	3267.27	3276.5	0.0387137
576A	555.65	Left	3	L-R	Unshod	0.65	4.8374	-321.63	-111.716	3100.47	3119.1	0.036032
576A	555.65	Left	3	L-R	Unshod	0.7	4.8772	-399.478	-101.886	2806.57	2836.69	0.0363026
576A	555.65	Left	3	L-R	Unshod	0.75	4.917	-431.349	-100.19	2442.68	2482.5	0.0410164
576A	555.65	Left	3	L-R	Unshod	0.8	4.9568	-420.483	-101.39	2052.69	2097.77	0.0493936
576A	555.65	Left	3	L-R	Unshod	0.85	4.9966	-352.28	-91.904	1578.66	1620.09	0.0582166
576A	555.65	Left	3	L-R	Unshod	0.9	5.0364	-195.371	-40.037	1057.84	1076.47	0.037848
576A	555.65	Left	3	L-R	Unshod	0.95	5.0762	-190.629	-15.172	685.767	711.931	0.0221241
576A	555.65	Left	3	L-R	Unshod	1	5.116	-0.668	-0.947	-2.025	2.33316	0.467654
576A	555.65	Left	4	R-L	Unshod	0	1.905	18.022	0.714	34.977	39.3534	0.0204134	4038.32	2750	0.594892	0.405108
576A	555.65	Left	4	R-L	Unshod	0.05	1.94575	-124.687	-10.148	426.386	444.359	0.0238
576A	555.65	Left	4	R-L	Unshod	0.1	1.9865	-175.126	37.401	899.542	917.193	0.0415778
576A	555.65	Left	4	R-L	Unshod	0.15	2.02725	-366.629	13.734	1770.54	1808.15	0.00775697
576A	555.65	Left	4	R-L	Unshod	0.2	2.068	-407.275	63.303	2249.01	2286.47	0.0281471
576A	555.65	Left	4	R-L	Unshod	0.25	2.10875	-409.358	53.686	2616.43	2648.81	0.0205188
576A	555.65	Left	4	R-L	Unshod	0.3	2.1495	-378.319	48.934	2849.34	2874.76	0.0171738
576A	555.65	Left	4	R-L	Unshod	0.35	2.19025	-315.829	67.759	2875.97	2894.05	0.0235604
576A	555.65	Left	4	R-L	Unshod	0.4	2.231	-239.081	84.207	2854.69	2865.92	0.0294978
576A	555.65	Left	4	R-L	Unshod	0.45	2.27175	-157.242	89.066	2845.32	2851.05	0.0313027
576A	555.65	Left	4	R-L	Unshod	0.5	2.3125	-71.321	80.875	2998.93	3000.87	0.0269679
576A	555.65	Left	4	R-L	Unshod	0.55	2.35325	42.509	66.863	3226.46	3227.43	0.0207233
576A	555.65	Left	4	R-L	Unshod	0.6	2.394	168.6	58.681	3314.72	3319.52	0.0177032
576A	555.65	Left	4	R-L	Unshod	0.65	2.43475	282.453	55.456	3194.12	3207.06	0.0173619
576A	555.65	Left	4	R-L	Unshod	0.7	2.4755	367.796	55.781	2860.55	2884.63	0.0195001
576A	555.65	Left	4	R-L	Unshod	0.75	2.51625	403.58	70.411	2488.57	2522.06	0.0282938
576A	555.65	Left	4	R-L	Unshod	0.8	2.557	401.951	84.633	2103.04	2142.78	0.0402431
576A	555.65	Left	4	R-L	Unshod	0.85	2.59775	350.116	86.029	1651.58	1690.47	0.0520889
576A	555.65	Left	4	R-L	Unshod	0.9	2.6385	193.066	52.995	1133.61	1151.16	0.0467487
576A	555.65	Left	4	R-L	Unshod	0.95	2.67925	213.791	10.351	805.078	833.045	0.0128571
576A	555.65	Left	4	R-L	Unshod	1	2.72	-2.156	0.935	-2.392	3.35324	0.390886
576A	555.65	Right	1	L-R	Unshod	0	3.099	-29.229	-5.811	117.277	121.004	0.0495494	2979.45	2070	0.590054	0.409946
576A	555.65	Right	1	L-R	Unshod	0.05	3.1361	172.927	-20.94	611.982	636.289	0.0342167
576A	555.65	Right	1	L-R	Unshod	0.1	3.1732	244.645	-10.035	1275.11	1298.41	0.00786989
576A	555.65	Right	1	L-R	Unshod	0.15	3.2103	386.081	20.739	1921.89	1960.4	0.0107909
576A	555.65	Right	1	L-R	Unshod	0.2	3.2474	429.553	38.201	2405.57	2443.91	0.0158803
576A	555.65	Right	1	L-R	Unshod	0.25	3.2845	440.412	47.428	2742	2777.55	0.0172969
576A	555.65	Right	1	L-R	Unshod	0.3	3.3216	399.165	24.573	2942.36	2969.41	0.00835147
576A	555.65	Right	1	L-R	Unshod	0.35	3.3587	345.282	19.187	2998.53	3018.4	0.00639881
576A	555.65	Right	1	L-R	Unshod	0.4	3.3958	268.423	0.956	3142.18	3153.62	0.000304248
576A	555.65	Right	1	L-R	Unshod	0.45	3.4329	184.186	-36.308	3367.94	3373.17	0.0107805
576A	555.65	Right	1	L-R	Unshod	0.5	3.47	65.702	-82.869	3533.75	3535.33	0.0234507
576A	555.65	Right	1	L-R	Unshod	0.55	3.5071	-45.88	-111.231	3521.18	3523.24	0.0315891
576A	555.65	Right	1	L-R	Unshod	0.6	3.5442	-142.01	-116.807	3320.75	3325.83	0.0351749
576A	555.65	Right	1	L-R	Unshod	0.65	3.5813	-221.426	-103.333	2954.86	2964.95	0.0349705
576A	555.65	Right	1	L-R	Unshod	0.7	3.6184	-263.278	-74.587	2577.79	2592.27	0.0289345
576A	555.65	Right	1	L-R	Unshod	0.75	3.6555	-286.637	-50.588	2200.1	2219.27	0.0229935
576A	555.65	Right	1	L-R	Unshod	0.8	3.6926	-303.644	-39.029	1948.52	1972.43	0.02003
576A	555.65	Right	1	L-R	Unshod	0.85	3.7297	-296.66	-40.718	1674.46	1701.02	0.0243171
576A	555.65	Right	1	L-R	Unshod	0.9	3.7668	-198.815	-56.046	1206.02	1223.58	0.0464719
576A	555.65	Right	1	L-R	Unshod	0.95	3.8039	-247.051	-52.397	854.027	890.585	0.0613529
576A	555.65	Right	1	L-R	Unshod	1	3.841	3.609	-0.656	-1.893	4.12779	0.34654
576A	555.65	Right	2	R-L	Unshod	0	1.257	-38.796	-6.046	164.78	169.393	0.0366913	3062.61	2093	0.594035	0.405965
576A	555.65	Right	2	R-L	Unshod	0.05	1.2975	-181.128	2.691	582.229	609.758	0.00462189
576A	555.65	Right	2	R-L	Unshod	0.1	1.338	-225.112	-19.877	1090.8	1113.96	0.0182225
576A	555.65	Right	2	R-L	Unshod	0.15	1.3785	-361.597	-33.257	1733.66	1771.28	0.0191831
576A	555.65	Right	2	R-L	Unshod	0.2	1.419	-411.749	-68.966	2151.35	2191.48	0.0320571
576A	555.65	Right	2	R-L	Unshod	0.25	1.4595	-411.804	-83.732	2464.79	2500.35	0.0339713
576A	555.65	Right	2	R-L	Unshod	0.3	1.5	-365.66	-79.841	2664.22	2690.38	0.0299679
576A	555.65	Right	2	R-L	Unshod	0.35	1.5405	-304.233	-90.026	2743.96	2762.24	0.0328088
576A	555.65	Right	2	R-L	Unshod	0.4	1.581	-238.764	-91.378	2872.52	2883.88	0.0318111
576A	555.65	Right	2	R-L	Unshod	0.45	1.6215	-151.832	-75.147	3093.74	3098.38	0.02429
576A	555.65	Right	2	R-L	Unshod	0.5	1.662	-38.161	-37.744	3293.92	3294.36	0.0114587
576A	555.65	Right	2	R-L	Unshod	0.55	1.7025	87.968	-6.486	3327.68	3328.85	0.0019491
576A	555.65	Right	2	R-L	Unshod	0.6	1.743	203.28	-2.939	3164.96	3171.48	0.000928607
576A	555.65	Right	2	R-L	Unshod	0.65	1.7835	286.262	-13.387	2857.75	2872.08	0.00468445
576A	555.65	Right	2	R-L	Unshod	0.7	1.824	332.101	-29.888	2497.88	2520.03	0.0119654
576A	555.65	Right	2	R-L	Unshod	0.75	1.8645	342.699	-43.84	2172.5	2199.8	0.0201795
576A	555.65	Right	2	R-L	Unshod	0.8	1.905	337.971	-57.235	1843.53	1875.13	0.0310464
576A	555.65	Right	2	R-L	Unshod	0.85	1.9455	269.083	-32.501	1443.74	1468.96	0.0225117
576A	555.65	Right	2	R-L	Unshod	0.9	1.986	155.647	-2.356	1039.84	1051.43	0.00226574
576A	555.65	Right	2	R-L	Unshod	0.95	2.0265	207.486	-1.558	701.506	731.549	0.00222094
576A	555.65	Right	2	R-L	Unshod	1	2.067	-3.182	-0.441	-2.356	3.98376	0.187182
576A	555.65	Right	3	L-R	Unshod	0	1.524	-1.705	-1.711	2.29	3.32846	0.747162	3014.22	2045	0.595788	0.404212
576A	555.65	Right	3	L-R	Unshod	0.05	1.56405	127.798	31.82	479.468	497.227	0.0663652
576A	555.65	Right	3	L-R	Unshod	0.1	1.6041	149.288	27.407	1086.08	1096.63	0.0252349
576A	555.65	Right	3	L-R	Unshod	0.15	1.64415	324.896	68.874	1709.36	1741.33	0.0402922
576A	555.65	Right	3	L-R	Unshod	0.2	1.6842	392.979	86.74	2244.01	2279.81	0.038654
576A	555.65	Right	3	L-R	Unshod	0.25	1.72425	392.419	99.629	2587.74	2619.23	0.0385003
576A	555.65	Right	3	L-R	Unshod	0.3	1.7643	354.704	92.698	2764.08	2788.29	0.0335366
576A	555.65	Right	3	L-R	Unshod	0.35	1.80435	291.118	97.378	2812.48	2829.18	0.0346235
576A	555.65	Right	3	L-R	Unshod	0.4	1.8444	211.429	101.13	2833.19	2842.87	0.0356948
576A	555.65	Right	3	L-R	Unshod	0.45	1.88445	134.302	100.067	2914.81	2919.62	0.0343305
576A	555.65	Right	3	L-R	Unshod	0.5	1.9245	48.518	63.225	3125.48	3126.5	0.0202289
576A	555.65	Right	3	L-R	Unshod	0.55	1.96455	-65.528	29.105	3300.21	3300.99	0.00881913
576A	555.65	Right	3	L-R	Unshod	0.6	2.0046	-185.449	-10.672	3364.73	3369.85	0.00317173
576A	555.65	Right	3	L-R	Unshod	0.65	2.04465	-291.638	-34.82	3213.93	3227.33	0.0108341
576A	555.65	Right	3	L-R	Unshod	0.7	2.0847	-367.895	-45.991	2937.91	2961.21	0.0156543
576A	555.65	Right	3	L-R	Unshod	0.75	2.12475	-409.663	-45.444	2582.31	2614.99	0.0175982
576A	555.65	Right	3	L-R	Unshod	0.8	2.1648	-407.587	-29.333	2196.1	2233.79	0.0133569
576A	555.65	Right	3	L-R	Unshod	0.85	2.20485	-352.714	-16.384	1746.5	1781.84	0.00938105
576A	555.65	Right	3	L-R	Unshod	0.9	2.2449	-197.052	-18.573	1175.52	1192.06	0.0157998
576A	555.65	Right	3	L-R	Unshod	0.95	2.28495	-225.647	-31.375	826.204	857.038	0.0379749
576A	555.65	Right	3	L-R	Unshod	1	2.325	0.177	-0.011	-1.569	1.57899	0.00701083
576A	555.65	Right	7	L-R	Unshod	0	3.024	-25.273	4.207	145.106	147.351	0.0289926	3060	2200	0.581749	0.418251
576A	555.65	Right	7	L-R	Unshod	0.05	3.0649	151.144	-25.141	577.536	597.515	0.0435315
576A	555.65	Right	7	L-R	Unshod	0.1	3.1058	272.432	-37.737	1290.44	1319.42	0.0292436
576A	555.65	Right	7	L-R	Unshod	0.15	3.1467	366.566	10.282	1794.36	1831.44	0.00573019
576A	555.65	Right	7	L-R	Unshod	0.2	3.1876	400.704	25.791	2264.16	2299.49	0.011391
576A	555.65	Right	7	L-R	Unshod	0.25	3.2285	400.664	40.576	2550.11	2581.71	0.0159115
576A	555.65	Right	7	L-R	Unshod	0.3	3.2694	365.386	39.036	2756.96	2781.34	0.0141591
576A	555.65	Right	7	L-R	Unshod	0.35	3.3103	292.319	38.804	2893.56	2908.55	0.0134105
576A	555.65	Right	7	L-R	Unshod	0.4	3.3512	214.628	54.526	2985.84	2994.05	0.0182615
576A	555.65	Right	7	L-R	Unshod	0.45	3.3921	130.362	32.189	3199.5	3202.31	0.0100606
576A	555.65	Right	7	L-R	Unshod	0.5	3.433	27.089	0.997	3393.69	3393.8	0.000293781
576A	555.65	Right	7	L-R	Unshod	0.55	3.4739	-87.93	-27.871	3432.83	3434.07	0.00811895
576A	555.65	Right	7	L-R	Unshod	0.6	3.5148	-193.452	-39.958	3260.02	3266	0.012257
576A	555.65	Right	7	L-R	Unshod	0.65	3.5557	-278.713	-35.073	2905.6	2919.15	0.0120708
576A	555.65	Right	7	L-R	Unshod	0.7	3.5966	-320.834	-25.039	2541.86	2562.15	0.00985065
576A	555.65	Right	7	L-R	Unshod	0.75	3.6375	-334.434	-9.644	2218.98	2244.06	0.00434614
576A	555.65	Right	7	L-R	Unshod	0.8	3.6784	-332.345	-1.774	1929.23	1957.65	0.000919538
576A	555.65	Right	7	L-R	Unshod	0.85	3.7193	-282.127	-5.432	1538.02	1563.69	0.00353181
576A	555.65	Right	7	L-R	Unshod	0.9	3.7602	-171.814	-10.744	1060.61	1074.49	0.01013
576A	555.65	Right	7	L-R	Unshod	0.95	3.8011	-207.743	-21.751	671.723	703.45	0.0323809
576A	555.65	Right	7	L-R	Unshod	1	3.842	-1.912	-0.156	2.421	3.0889	0.0644362
674	530.7	Left	1	L-R	Unshod	0	12.3	-0.653	-0.269	-3.384	3.45691	0.0794917	3006.94	2330	0.56342	0.43658
674	530.7	Left	1	L-R	Unshod	0.05	12.341	18.365	-0.607	86.838	88.7608	0.00699003
674	530.7	Left	1	L-R	Unshod	0.1	12.382	-6.355	138.616	918.676	929.097	0.150887
674	530.7	Left	1	L-R	Unshod	0.15	12.423	-64.411	356.502	1674.06	1712.81	0.212956
674	530.7	Left	1	L-R	Unshod	0.2	12.464	-64.97	384.578	2050.04	2086.81	0.187595
674	530.7	Left	1	L-R	Unshod	0.25	12.505	-88.453	356.36	2164.94	2195.85	0.164605
674	530.7	Left	1	L-R	Unshod	0.3	12.546	-105.12	340.909	2287.78	2315.43	0.149013
674	530.7	Left	1	L-R	Unshod	0.35	12.587	-107.404	290.862	2327.47	2348.03	0.124969
674	530.7	Left	1	L-R	Unshod	0.4	12.628	-104.718	208.846	2346.88	2358.48	0.0889888
674	530.7	Left	1	L-R	Unshod	0.45	12.669	-92.764	132.2	2501.9	2507.11	0.0528399
674	530.7	Left	1	L-R	Unshod	0.5	12.71	-82.459	30.537	2903.76	2905.09	0.0105164
674	530.7	Left	1	L-R	Unshod	0.55	12.751	-65.925	-86.567	3274.37	3276.17	0.0264378
674	530.7	Left	1	L-R	Unshod	0.6	12.792	-49.172	-223.432	3404.12	3411.8	0.0656358
674	530.7	Left	1	L-R	Unshod	0.65	12.833	-52.148	-347.24	3274.43	3293.2	0.106046
674	530.7	Left	1	L-R	Unshod	0.7	12.874	-51.202	-415.868	2948.62	2978.24	0.141038
674	530.7	Left	1	L-R	Unshod	0.75	12.915	-48.256	-402.588	2392.51	2426.63	0.16827
674	530.7	Left	1	L-R	Unshod	0.8	12.956	-43.898	-281.495	1712.07	1735.61	0.164418
674	530.7	Left	1	L-R	Unshod	0.85	12.997	-0.849	-202.82	1220.47	1237.21	0.166182
674	530.7	Left	1	L-R	Unshod	0.9	13.038	10.17	-129.448	762.083	773.066	0.169861
674	530.7	Left	1	L-R	Unshod	0.95	13.079	8.451	-63.249	150.635	163.593	0.419882
674	530.7	Left	1	L-R	Unshod	1	13.12	0.541	0.186	4.21	4.24869	0.0441805
674	530.7	Left	3	L-R	Unshod	0	3.321	14.696	-7.614	30.3	34.5259	0.251287	3012.32	2180	0.580149	0.419851
674	530.7	Left	3	L-R	Unshod	0.05	3.35995	34.596	-8.733	59.08	69.0188	0.147817
674	530.7	Left	3	L-R	Unshod	0.1	3.3989	12.183	133.092	745.585	757.469	0.178507
674	530.7	Left	3	L-R	Unshod	0.15	3.43785	-40.057	266.18	1588.16	1610.81	0.167603
674	530.7	Left	3	L-R	Unshod	0.2	3.4768	-64.033	326.067	2072.4	2098.87	0.157338
674	530.7	Left	3	L-R	Unshod	0.25	3.51575	-89.605	296.691	2286.57	2307.47	0.129754
674	530.7	Left	3	L-R	Unshod	0.3	3.5547	-96.08	250.636	2340.11	2355.45	0.107105
674	530.7	Left	3	L-R	Unshod	0.35	3.59365	-95.806	214.512	2345.47	2357.21	0.0914579
674	530.7	Left	3	L-R	Unshod	0.4	3.6326	-87.444	167.893	2311.62	2319.36	0.0726299
674	530.7	Left	3	L-R	Unshod	0.45	3.67155	-75.936	108.107	2397.19	2400.82	0.0450975
674	530.7	Left	3	L-R	Unshod	0.5	3.7105	-63.886	28.114	2741.47	2742.36	0.0102551
674	530.7	Left	3	L-R	Unshod	0.55	3.74945	-27.515	-63.524	3117.79	3118.56	0.0203747
674	530.7	Left	3	L-R	Unshod	0.6	3.7884	12.349	-190.563	3416.83	3422.16	0.0557719
674	530.7	Left	3	L-R	Unshod	0.65	3.82735	36.272	-325.61	3477.71	3493.11	0.0936278
674	530.7	Left	3	L-R	Unshod	0.7	3.8663	53.104	-429.326	3308.41	3336.57	0.129768
674	530.7	Left	3	L-R	Unshod	0.75	3.90525	43.672	-469.61	2855.22	2893.92	0.164474
674	530.7	Left	3	L-R	Unshod	0.8	3.9442	16.973	-389.509	2245.3	2278.9	0.173478
674	530.7	Left	3	L-R	Unshod	0.85	3.98315	0.189	-274.213	1656.21	1678.76	0.165566
674	530.7	Left	3	L-R	Unshod	0.9	4.0221	5.061	-216.715	1223.68	1242.73	0.177101
674	530.7	Left	3	L-R	Unshod	0.95	4.06105	20.442	-183.574	718.979	742.326	0.255326
674	530.7	Left	3	L-R	Unshod	1	4.1	-0.762	1.17	1.251	1.87471	0.935252
674	530.7	Left	5	L-R	Unshod	0	0.7	76.768	23.4	254.172	266.541	0.0920636	2987.9	2081	0.589458	0.410542
674	530.7	Left	5	L-R	Unshod	0.05	0.7363	44.3	269.745	565.958	628.517	0.476617
674	530.7	Left	5	L-R	Unshod	0.1	0.7726	-1.917	279.098	1368.44	1396.62	0.203953
674	530.7	Left	5	L-R	Unshod	0.15	0.8089	-81.006	365.356	1877.53	1914.46	0.194594
674	530.7	Left	5	L-R	Unshod	0.2	0.8452	-88.048	376.882	2254.27	2287.25	0.167186
674	530.7	Left	5	L-R	Unshod	0.25	0.8815	-113.302	354.595	2414.84	2443.37	0.14684
674	530.7	Left	5	L-R	Unshod	0.3	0.9178	-125.478	354.244	2559.42	2586.87	0.138408
674	530.7	Left	5	L-R	Unshod	0.35	0.9541	-133.733	294.341	2508.65	2529.4	0.11733
674	530.7	Left	5	L-R	Unshod	0.4	0.9904	-140.913	197.184	2403.71	2415.9	0.0820332
674	530.7	Left	5	L-R	Unshod	0.45	1.0267	-148.734	130.563	2557.57	2565.22	0.0510496
674	530.7	Left	5	L-R	Unshod	0.5	1.063	-146.837	53.723	2925.5	2929.68	0.0183637
674	530.7	Left	5	L-R	Unshod	0.55	1.0993	-132.74	-59.054	3294.65	3297.85	0.0179242
674	530.7	Left	5	L-R	Unshod	0.6	1.1356	-109.525	-221.087	3555.01	3563.56	0.0621903
674	530.7	Left	5	L-R	Unshod	0.65	1.1719	-104.168	-361.487	3543.95	3563.87	0.102001
674	530.7	Left	5	L-R	Unshod	0.7	1.2082	-95.084	-460.361	3298.05	3331.38	0.139586
674	530.7	Left	5	L-R	Unshod	0.75	1.2445	-82.406	-474.33	2780.09	2821.47	0.170617
674	530.7	Left	5	L-R	Unshod	0.8	1.2808	-71.505	-294.415	1883.87	1908.08	0.156282
674	530.7	Left	5	L-R	Unshod	0.85	1.3171	-44.922	-247.758	1487.74	1508.9	0.166533
674	530.7	Left	5	L-R	Unshod	0.9	1.3534	-27.051	-213.678	1148.22	1168.24	0.186095
674	530.7	Left	5	L-R	Unshod	0.95	1.3897	2.868	-179.063	697.253	719.884	0.256812
674	530.7	Left	5	L-R	Unshod	1	1.426	-0.63	1.815	5	5.35641	0.363
674	530.7	Left	6	R-L	Unshod	0	9.281	-72.92	-6.644	140.895	158.786	0.0471557	2997.44	2305	0.565295	0.434705
674	530.7	Left	6	R-L	Unshod	0.05	9.31995	-151.942	-111.416	404.125	445.889	0.275697
674	530.7	Left	6	R-L	Unshod	0.1	9.3589	-106.816	-228.407	1246.24	1271.49	0.183277
674	530.7	Left	6	R-L	Unshod	0.15	9.39785	-47.911	-339.909	1812.97	1845.19	0.187487
674	530.7	Left	6	R-L	Unshod	0.2	9.4368	-72.716	-348.757	2201.01	2229.65	0.158453
674	530.7	Left	6	R-L	Unshod	0.25	9.47575	-41.441	-339.503	2342.88	2367.72	0.144908
674	530.7	Left	6	R-L	Unshod	0.3	9.5147	-18.14	-323.553	2447.04	2468.4	0.132222
674	530.7	Left	6	R-L	Unshod	0.35	9.55365	-1.575	-261.911	2450.47	2464.42	0.106882
674	530.7	Left	6	R-L	Unshod	0.4	9.5926	19.685	-176.211	2449.09	2455.5	0.0719496
674	530.7	Left	6	R-L	Unshod	0.45	9.63155	22.354	-106.179	2672.22	2674.42	0.0397344
674	530.7	Left	6	R-L	Unshod	0.5	9.6705	-6.445	-20.897	3041.78	3041.86	0.00686998
674	530.7	Left	6	R-L	Unshod	0.55	9.70945	-26.868	91.512	3268.46	3269.85	0.0279985
674	530.7	Left	6	R-L	Unshod	0.6	9.7484	-34.758	225.975	3299.68	3307.59	0.068484
674	530.7	Left	6	R-L	Unshod	0.65	9.78735	-22.3	328.904	3080.74	3098.33	0.106761
674	530.7	Left	6	R-L	Unshod	0.7	9.8263	-4.114	365.353	2651.39	2676.45	0.137797
674	530.7	Left	6	R-L	Unshod	0.75	9.86525	14.279	323.725	2140.83	2165.22	0.151215
674	530.7	Left	6	R-L	Unshod	0.8	9.9042	32.749	282.351	1777	1799.59	0.158892
674	530.7	Left	6	R-L	Unshod	0.85	9.94315	3.655	241.019	1395.62	1416.29	0.172696
674	530.7	Left	6	R-L	Unshod	0.9	9.9821	-17.879	170.176	1018.43	1032.7	0.167097
674	530.7	Left	6	R-L	Unshod	0.95	10.0211	-25.294	145.893	545.579	565.315	0.267409
674	530.7	Left	6	R-L	Unshod	1	10.06	0.404	-0.248	-1.995	2.05055	0.124311
674	530.7	Right	1	L-R	Unshod	0	3.287	-6.069	5.218	124.347	124.604	0.0419632	2997.63	2230	0.57342	0.42658
674	530.7	Right	1	L-R	Unshod	0.05	3.3268	-72.589	197.382	523.284	563.964	0.377199
674	530.7	Right	1	L-R	Unshod	0.1	3.3666	-64.095	261.097	1181.54	1211.74	0.220981
674	530.7	Right	1	L-R	Unshod	0.15	3.4064	-31.723	390.25	1848.14	1889.16	0.211158
674	530.7	Right	1	L-R	Unshod	0.2	3.4462	-21.843	418.511	2228.03	2267.1	0.187839
674	530.7	Right	1	L-R	Unshod	0.25	3.486	-12.054	444.787	2460.1	2500.01	0.180801
674	530.7	Right	1	L-R	Unshod	0.3	3.5258	-5.261	411.478	2532.14	2565.37	0.162502
674	530.7	Right	1	L-R	Unshod	0.35	3.5656	-5.185	323.08	2436.15	2457.49	0.132619
674	530.7	Right	1	L-R	Unshod	0.4	3.6054	-3.82	238.116	2430.07	2441.71	0.0979872
674	530.7	Right	1	L-R	Unshod	0.45	3.6452	-35.351	161.667	2654.47	2659.63	0.0609036
674	530.7	Right	1	L-R	Unshod	0.5	3.685	-87.798	62.732	3076.21	3078.1	0.0203926
674	530.7	Right	1	L-R	Unshod	0.55	3.7248	-117.145	-40.791	3372.37	3374.65	0.0120956
674	530.7	Right	1	L-R	Unshod	0.6	3.7646	-133.025	-163.158	3439.72	3446.16	0.0474335
674	530.7	Right	1	L-R	Unshod	0.65	3.8044	-119.218	-263.54	3192.63	3205.71	0.0825463
674	530.7	Right	1	L-R	Unshod	0.7	3.8442	-74.968	-298.365	2709.17	2726.58	0.110131
674	530.7	Right	1	L-R	Unshod	0.75	3.884	-44.004	-288.483	2254.16	2272.97	0.127978
674	530.7	Right	1	L-R	Unshod	0.8	3.9238	-20.77	-260.157	1869.16	1887.29	0.139184
674	530.7	Right	1	L-R	Unshod	0.85	3.9636	-35.794	-199.738	1471.47	1485.4	0.13574
674	530.7	Right	1	L-R	Unshod	0.9	4.0034	-51.385	-149.983	1137.48	1148.47	0.131856
674	530.7	Right	1	L-R	Unshod	0.95	4.0432	-39.16	-144.272	707.547	723.167	0.203904
674	530.7	Right	1	L-R	Unshod	1	4.083	-3.243	0.671	-2.706	4.27665	0.247967
674	530.7	Right	2	R-L	Unshod	0	4.185	10.517	-0.368	17.723	20.6118	0.020764	4029.69	2941	0.578091	0.421909
674	530.7	Right	2	R-L	Unshod	0.05	4.22735	42.539	-156.037	404.294	435.443	0.385949
674	530.7	Right	2	R-L	Unshod	0.1	4.2697	-1.704	-209.435	1055.05	1075.64	0.198507
674	530.7	Right	2	R-L	Unshod	0.15	4.31205	-91.862	-371.241	1970.33	2007.1	0.188416
674	530.7	Right	2	R-L	Unshod	0.2	4.3544	-132.864	-368.206	2324.83	2357.55	0.15838
674	530.7	Right	2	R-L	Unshod	0.25	4.39675	-159.718	-356.084	2454.44	2485.27	0.145077
674	530.7	Right	2	R-L	Unshod	0.3	4.4391	-168.472	-338.909	2474.87	2503.64	0.13694
674	530.7	Right	2	R-L	Unshod	0.35	4.48145	-175.622	-246.517	2378.67	2397.85	0.103637
674	530.7	Right	2	R-L	Unshod	0.4	4.5238	-180.078	-155.063	2432.2	2443.78	0.0637543
674	530.7	Right	2	R-L	Unshod	0.45	4.56615	-171.099	-61.26	2633.64	2639.9	0.0232606
674	530.7	Right	2	R-L	Unshod	0.5	4.6085	-141.863	14.579	2863.55	2867.1	0.00509123
674	530.7	Right	2	R-L	Unshod	0.55	4.65085	-118.015	126.373	3180.46	3185.16	0.0397341
674	530.7	Right	2	R-L	Unshod	0.6	4.6932	-100.55	242.194	3296.68	3307.09	0.0734661
674	530.7	Right	2	R-L	Unshod	0.65	4.73555	-87.575	355.241	3146.72	3167.92	0.112892
674	530.7	Right	2	R-L	Unshod	0.7	4.7779	-86.362	406.462	2820.43	2850.88	0.144113
674	530.7	Right	2	R-L	Unshod	0.75	4.82025	-84.713	384.856	2331.64	2364.7	0.165058
674	530.7	Right	2	R-L	Unshod	0.8	4.8626	-80.481	312.417	1837.98	1866.08	0.169978
674	530.7	Right	2	R-L	Unshod	0.85	4.90495	-36.63	247.505	1403.39	1425.52	0.176363
674	530.7	Right	2	R-L	Unshod	0.9	4.9473	6.39	150.003	992.165	1003.46	0.151188
674	530.7	Right	2	R-L	Unshod	0.95	4.98965	20.571	122.472	576.469	589.694	0.212452
674	530.7	Right	2	R-L	Unshod	1	5.032	-0.866	0.524	-1.426	1.74872	0.367461
674	530.7	Right	3	R-L	Unshod	0	2.204	2.225	17.774	194.645	195.467	0.091315	3949.18	2644	0.59898	0.40102
674	530.7	Right	3	R-L	Unshod	0.05	2.2437	103.154	-333.404	762.319	838.409	0.437355
674	530.7	Right	3	R-L	Unshod	0.1	2.2834	-32.767	-404.285	1694.8	1742.66	0.238545
674	530.7	Right	3	R-L	Unshod	0.15	2.3231	-86.653	-504.311	2283.38	2340.01	0.220862
674	530.7	Right	3	R-L	Unshod	0.2	2.3628	-116.2	-476.809	2566.31	2612.81	0.185796
674	530.7	Right	3	R-L	Unshod	0.25	2.4025	-131.126	-408.508	2620.94	2655.83	0.155863
674	530.7	Right	3	R-L	Unshod	0.3	2.4422	-130.264	-375.295	2571.49	2601.99	0.145945
674	530.7	Right	3	R-L	Unshod	0.35	2.4819	-119.066	-289.669	2411.47	2431.72	0.120122
674	530.7	Right	3	R-L	Unshod	0.4	2.5216	-114.461	-194.045	2368.64	2379.32	0.0819227
674	530.7	Right	3	R-L	Unshod	0.45	2.5613	-92.574	-111.984	2580.23	2584.31	0.0434008
674	530.7	Right	3	R-L	Unshod	0.5	2.601	-66.965	4.248	3013.8	3014.54	0.00140952
674	530.7	Right	3	R-L	Unshod	0.55	2.6407	-36.11	140.707	3361.27	3364.41	0.0418613
674	530.7	Right	3	R-L	Unshod	0.6	2.6804	-14.144	287.337	3436.37	3448.4	0.0836163
674	530.7	Right	3	R-L	Unshod	0.65	2.7201	-8.63	390.486	3177.13	3201.05	0.122905
674	530.7	Right	3	R-L	Unshod	0.7	2.7598	-14.603	403.808	2713.12	2743.05	0.148835
674	530.7	Right	3	R-L	Unshod	0.75	2.7995	-21.581	328.534	2086.59	2112.41	0.15745
674	530.7	Right	3	R-L	Unshod	0.8	2.8392	-28.092	246.856	1579.19	1598.62	0.156318
674	530.7	Right	3	R-L	Unshod	0.85	2.8789	12.69	199.99	1246.71	1262.72	0.160414
674	530.7	Right	3	R-L	Unshod	0.9	2.9186	32.725	135.866	835.431	847.039	0.16263
674	530.7	Right	3	R-L	Unshod	0.95	2.9583	25.404	74.989	183.877	200.199	0.407822
674	530.7	Right	3	R-L	Unshod	1	2.998	1.579	-0.227	1.116	1.94685	0.203405
674	530.7	Right	4	R-L	Unshod	0	3.437	12.521	-27.33	219.549	221.598	0.124482	3964.14	2730	0.592181	0.407819
674	530.7	Right	4	R-L	Unshod	0.05	3.4765	96.143	-300.063	664.686	735.587	0.451436
674	530.7	Right	4	R-L	Unshod	0.1	3.516	-22.871	-376.024	1622.49	1665.65	0.231757
674	530.7	Right	4	R-L	Unshod	0.15	3.5555	-80.588	-474.495	2270.34	2320.79	0.208998
674	530.7	Right	4	R-L	Unshod	0.2	3.595	-124.202	-460.874	2552.24	2596.49	0.180576
674	530.7	Right	4	R-L	Unshod	0.25	3.6345	-145.311	-457.228	2685.58	2728.09	0.170253
674	530.7	Right	4	R-L	Unshod	0.3	3.674	-145.583	-409.475	2638.3	2673.85	0.155204
674	530.7	Right	4	R-L	Unshod	0.35	3.7135	-149.835	-304.751	2432.11	2455.7	0.125303
674	530.7	Right	4	R-L	Unshod	0.4	3.753	-143.292	-204.366	2341.79	2355.05	0.0872691
674	530.7	Right	4	R-L	Unshod	0.45	3.7925	-129.297	-126.22	2512.49	2518.98	0.050237
674	530.7	Right	4	R-L	Unshod	0.5	3.832	-97.203	-49.162	2893.61	2895.66	0.0169899
674	530.7	Right	4	R-L	Unshod	0.55	3.8715	-76.858	68.335	3273.53	3275.15	0.020875
674	530.7	Right	4	R-L	Unshod	0.6	3.911	-68.934	200.369	3423.29	3429.84	0.0585312
674	530.7	Right	4	R-L	Unshod	0.65	3.9505	-59.967	314.299	3284.89	3300.43	0.0956803
674	530.7	Right	4	R-L	Unshod	0.7	3.99	-62.412	356.606	2814.68	2837.86	0.126695
674	530.7	Right	4	R-L	Unshod	0.75	4.0295	-67.15	316.692	2271.66	2294.61	0.13941
674	530.7	Right	4	R-L	Unshod	0.8	4.069	-77.548	247.245	1728.63	1747.95	0.143029
674	530.7	Right	4	R-L	Unshod	0.85	4.1085	-40.517	202.385	1345.77	1361.5	0.150386
674	530.7	Right	4	R-L	Unshod	0.9	4.148	-10.306	144.902	1057.73	1067.65	0.136994
674	530.7	Right	4	R-L	Unshod	0.95	4.1875	10.781	137.944	679.755	693.694	0.202932
674	530.7	Right	4	R-L	Unshod	1	4.227	4.08	6.321	7	10.2763	0.903
701	449.96	Left	1	L-R	Unshod	0	3.993	-0.137	1.771	50	50.0315	0.03542	3953.02	2771	0.587896	0.412104
701	449.96	Left	1	L-R	Unshod	0.05	4.0327	26.651	-3.638	179.653	181.655	0.0202501
701	449.96	Left	1	L-R	Unshod	0.1	4.0724	15.428	133.69	732.689	744.946	0.182465
701	449.96	Left	1	L-R	Unshod	0.15	4.1121	-30.653	295.584	1382.52	1414.09	0.213801
701	449.96	Left	1	L-R	Unshod	0.2	4.1518	-60.68	328.805	1776.61	1807.8	0.185074
701	449.96	Left	1	L-R	Unshod	0.25	4.1915	-97.001	306.889	2010.84	2036.44	0.152617
701	449.96	Left	1	L-R	Unshod	0.3	4.2312	-126.165	273.384	2149.9	2170.88	0.127161
701	449.96	Left	1	L-R	Unshod	0.35	4.2709	-153.813	228.654	2209.17	2226.29	0.103502
701	449.96	Left	1	L-R	Unshod	0.4	4.3106	-169.576	169.725	2273.24	2285.87	0.0746621
701	449.96	Left	1	L-R	Unshod	0.45	4.3503	-167.828	110.757	2391.99	2400.42	0.0463034
701	449.96	Left	1	L-R	Unshod	0.5	4.39	-155.189	40.969	2608.63	2613.57	0.0157052
701	449.96	Left	1	L-R	Unshod	0.55	4.4297	-148.621	-47.7	2763.39	2767.8	0.0172614
701	449.96	Left	1	L-R	Unshod	0.6	4.4694	-136.742	-155.941	2753	2760.8	0.0566441
701	449.96	Left	1	L-R	Unshod	0.65	4.5091	-117.761	-235.274	2577.34	2590.73	0.0912857
701	449.96	Left	1	L-R	Unshod	0.7	4.5488	-103.045	-280.241	2320.63	2339.76	0.120761
701	449.96	Left	1	L-R	Unshod	0.75	4.5885	-93.952	-297.652	1980.12	2004.57	0.15032
701	449.96	Left	1	L-R	Unshod	0.8	4.6282	-75.646	-253.179	1491.22	1514.45	0.169779
701	449.96	Left	1	L-R	Unshod	0.85	4.6679	-31.246	-107.57	891.559	898.568	0.120654
701	449.96	Left	1	L-R	Unshod	0.9	4.7076	-11.707	-72.472	565.488	570.233	0.128158
701	449.96	Left	1	L-R	Unshod	0.95	4.7473	2.845	-55.519	148.26	158.34	0.374471
701	449.96	Left	1	L-R	Unshod	1	4.787	-0.952	-1.554	5	5.32177	0.3108
701	449.96	Left	2	R-L	Unshod	0	3.251	-53.898	-81.713	303.342	318.745	0.269376	4061.58	2790	0.592795	0.407205
701	449.96	Left	2	R-L	Unshod	0.05	3.2894	-56.458	-133.209	455.798	478.209	0.292254
701	449.96	Left	2	R-L	Unshod	0.1	3.3278	-22.387	-231.242	1169.58	1192.43	0.197714
701	449.96	Left	2	R-L	Unshod	0.15	3.3662	-5.958	-329.682	1640.76	1673.56	0.200933
701	449.96	Left	2	R-L	Unshod	0.2	3.4046	29.479	-345.624	1924.92	1955.92	0.179553
701	449.96	Left	2	R-L	Unshod	0.25	3.443	53.478	-328.555	2154.28	2179.85	0.152513
701	449.96	Left	2	R-L	Unshod	0.3	3.4814	75.949	-322.06	2366.2	2389.22	0.136109
701	449.96	Left	2	R-L	Unshod	0.35	3.5198	94.318	-281.868	2473.9	2491.69	0.113937
701	449.96	Left	2	R-L	Unshod	0.4	3.5582	104.118	-214.228	2557.36	2568.42	0.0837694
701	449.96	Left	2	R-L	Unshod	0.45	3.5966	78.18	-158.798	2727.04	2732.78	0.058231
701	449.96	Left	2	R-L	Unshod	0.5	3.635	60.045	-67.961	2859.53	2860.96	0.0237665
701	449.96	Left	2	R-L	Unshod	0.55	3.6734	52.835	24.66	2804.74	2805.35	0.00879225
701	449.96	Left	2	R-L	Unshod	0.6	3.7118	37.484	111.606	2596.41	2599.08	0.0429848
701	449.96	Left	2	R-L	Unshod	0.65	3.7502	16.336	166.008	2309.61	2315.63	0.0718769
701	449.96	Left	2	R-L	Unshod	0.7	3.7886	7.686	194.585	2063.1	2072.27	0.0943169
701	449.96	Left	2	R-L	Unshod	0.75	3.827	12.624	216.507	1820.67	1833.55	0.118916
701	449.96	Left	2	R-L	Unshod	0.8	3.8654	18.722	210.472	1502.35	1517.14	0.140095
701	449.96	Left	2	R-L	Unshod	0.85	3.9038	11.196	127.876	1051.94	1059.75	0.121562
701	449.96	Left	2	R-L	Unshod	0.9	3.9422	-0.707	69.558	696.095	699.562	0.099926
701	449.96	Left	2	R-L	Unshod	0.95	3.9806	-3.347	107.203	380.366	395.199	0.281842
701	449.96	Left	2	R-L	Unshod	1	4.019	0.49	0.136	1.681	1.75623	0.0809042
701	449.96	Left	4	L-R	Unshod	0	5.218	37.807	4.094	260.733	263.492	0.0157019	4269.35	3121	0.577693	0.422307
701	449.96	Left	4	L-R	Unshod	0.05	5.25345	-12.326	79.923	644.585	649.638	0.123991
701	449.96	Left	4	L-R	Unshod	0.1	5.2889	-30.969	231.855	1324.82	1345.32	0.175008
701	449.96	Left	4	L-R	Unshod	0.15	5.32435	-41.997	260.082	1666.29	1686.99	0.156085
701	449.96	Left	4	L-R	Unshod	0.2	5.3598	-88.461	266.95	1907.29	1927.92	0.139963
701	449.96	Left	4	L-R	Unshod	0.25	5.39525	-112.014	236.958	2058.29	2074.91	0.115124
701	449.96	Left	4	L-R	Unshod	0.3	5.4307	-138.383	214.524	2154.92	2169.99	0.0995509
701	449.96	Left	4	L-R	Unshod	0.35	5.46615	-163.148	177.779	2231.93	2244.94	0.0796525
701	449.96	Left	4	L-R	Unshod	0.4	5.5016	-176.395	127.764	2347.2	2357.29	0.0544324
701	449.96	Left	4	L-R	Unshod	0.45	5.53705	-186.267	73.474	2591.7	2599.42	0.0283497
701	449.96	Left	4	L-R	Unshod	0.5	5.5725	-191.456	-10.425	2888.75	2895.1	0.00360883
701	449.96	Left	4	L-R	Unshod	0.55	5.60795	-191.512	-113.467	3030.61	3038.77	0.0374404
701	449.96	Left	4	L-R	Unshod	0.6	5.6434	-185.574	-212.589	2976.16	2989.51	0.0714307
701	449.96	Left	4	L-R	Unshod	0.65	5.67885	-164.363	-289.545	2749.91	2770	0.105292
701	449.96	Left	4	L-R	Unshod	0.7	5.7143	-137.893	-322.467	2380.26	2405.96	0.135475
701	449.96	Left	4	L-R	Unshod	0.75	5.74975	-110.134	-308.629	1922.88	1950.6	0.160504
701	449.96	Left	4	L-R	Unshod	0.8	5.7852	-68.334	-190.203	1238.93	1255.3	0.153522
701	449.96	Left	4	L-R	Unshod	0.85	5.82065	-28.591	-101.436	806.98	813.833	0.125698
701	449.96	Left	4	L-R	Unshod	0.9	5.8561	-10.728	-92.716	504.026	512.595	0.183951
701	449.96	Left	4	L-R	Unshod	0.95	5.89155	3.896	-24.309	40.175	47.1183	0.605078
701	449.96	Left	4	L-R	Unshod	1	5.927	-1.788	-1.207	1.4	2.57173	0.862143
701	449.96	Left	5	R-L	Unshod	0	1.28	-18.191	-44.716	277.036	281.211	0.161409	4120.77	2782	0.596973	0.403027
701	449.96	Left	5	R-L	Unshod	0.05	1.31625	-9.036	-95.313	649.47	656.489	0.146755
701	449.96	Left	5	R-L	Unshod	0.1	1.3525	-11.319	-262.954	1388.51	1413.24	0.189378
701	449.96	Left	5	R-L	Unshod	0.15	1.38875	-2.781	-301.499	1751.72	1777.48	0.172116
701	449.96	Left	5	R-L	Unshod	0.2	1.425	45.38	-298.63	2028.43	2050.8	0.147222
701	449.96	Left	5	R-L	Unshod	0.25	1.46125	64.856	-292.892	2195.09	2215.49	0.133431
701	449.96	Left	5	R-L	Unshod	0.3	1.4975	85.826	-270.741	2314.53	2331.89	0.116975
701	449.96	Left	5	R-L	Unshod	0.35	1.53375	115.014	-227.097	2392.53	2406.04	0.094919
701	449.96	Left	5	R-L	Unshod	0.4	1.57	144.015	-144.99	2526.71	2534.96	0.0573829
701	449.96	Left	5	R-L	Unshod	0.45	1.60625	142.446	-78.397	2695.49	2700.38	0.0290846
701	449.96	Left	5	R-L	Unshod	0.5	1.6425	132.919	4.837	2874.2	2877.28	0.0016829
701	449.96	Left	5	R-L	Unshod	0.55	1.67875	120.293	101.411	2925.48	2929.71	0.0346647
701	449.96	Left	5	R-L	Unshod	0.6	1.715	105.16	190.64	2795.61	2804.07	0.0681927
701	449.96	Left	5	R-L	Unshod	0.65	1.75125	80.947	262.357	2532.39	2547.23	0.1036
701	449.96	Left	5	R-L	Unshod	0.7	1.7875	61.474	291.575	2228.11	2247.95	0.130862
701	449.96	Left	5	R-L	Unshod	0.75	1.82375	46.146	289.453	1876.02	1898.78	0.154291
701	449.96	Left	5	R-L	Unshod	0.8	1.86	36.965	231.694	1416.48	1435.78	0.16357
701	449.96	Left	5	R-L	Unshod	0.85	1.89625	4.7	103.6	871.601	877.749	0.118862
701	449.96	Left	5	R-L	Unshod	0.9	1.9325	-1.815	82.748	596.62	602.334	0.138695
701	449.96	Left	5	R-L	Unshod	0.95	1.96875	-12.087	75.017	204.078	217.765	0.36759
701	449.96	Left	5	R-L	Unshod	1	2.005	1.698	1.432	3.785	4.38863	0.378336
701	449.96	Right	3	L-R	Unshod	0	3.209	6.388	24.887	43.68	50.6765	0.569757	4157.74	2818	0.596029	0.403971
701	449.96	Right	3	L-R	Unshod	0.05	3.2497	-20.782	58.317	346.449	351.937	0.168328
701	449.96	Right	3	L-R	Unshod	0.1	3.2904	44.597	111.801	905.257	913.224	0.123502
701	449.96	Right	3	L-R	Unshod	0.15	3.3311	89.874	231.381	1398.97	1420.83	0.165393
701	449.96	Right	3	L-R	Unshod	0.2	3.3718	110.526	252.96	1720.7	1742.7	0.14701
701	449.96	Right	3	L-R	Unshod	0.25	3.4125	123.647	239.201	1932.46	1951.13	0.123781
701	449.96	Right	3	L-R	Unshod	0.3	3.4532	132.431	200.41	2065.65	2079.57	0.0970203
701	449.96	Right	3	L-R	Unshod	0.35	3.4939	124.867	165.015	2148.81	2158.75	0.0767937
701	449.96	Right	3	L-R	Unshod	0.4	3.5346	99.28	119.231	2230.51	2235.9	0.0534545
701	449.96	Right	3	L-R	Unshod	0.45	3.5753	42.434	71.837	2395.2	2396.65	0.0299921
701	449.96	Right	3	L-R	Unshod	0.5	3.616	-9.074	3.901	2618.11	2618.13	0.00149001
701	449.96	Right	3	L-R	Unshod	0.55	3.6567	-39.711	-90.019	2779.71	2781.45	0.0323843
701	449.96	Right	3	L-R	Unshod	0.6	3.6974	-62.546	-188.705	2768.21	2775.34	0.0681685
701	449.96	Right	3	L-R	Unshod	0.65	3.7381	-68.774	-267.231	2590.59	2605.24	0.103155
701	449.96	Right	3	L-R	Unshod	0.7	3.7788	-60.361	-311.606	2285.47	2307.4	0.136342
701	449.96	Right	3	L-R	Unshod	0.75	3.8195	-44.609	-321.999	1971.4	1998.02	0.163335
701	449.96	Right	3	L-R	Unshod	0.8	3.8602	-32.387	-303.129	1617.58	1646.06	0.187396
701	449.96	Right	3	L-R	Unshod	0.85	3.9009	-29.135	-182.217	1085.35	1100.92	0.167888
701	449.96	Right	3	L-R	Unshod	0.9	3.9416	-43.818	-103.511	675.172	684.465	0.153311
701	449.96	Right	3	L-R	Unshod	0.95	3.9823	-28.279	-69.11	141.904	160.352	0.487019
701	449.96	Right	3	L-R	Unshod	1	4.023	-0.375	1.054	6.5	6.59557	0.162154
701	449.96	Right	4	R-L	Unshod	0	3.174	-7.258	-17.264	40.876	44.9619	0.422351	4112.43	2950	0.582297	0.417703
701	449.96	Right	4	R-L	Unshod	0.05	3.212	13.256	-99.244	440.624	451.857	0.225235
701	449.96	Right	4	R-L	Unshod	0.1	3.25	-34.405	-196.81	1111.43	1129.25	0.177077
701	449.96	Right	4	R-L	Unshod	0.15	3.288	-76.695	-253.309	1455.06	1478.94	0.174088
701	449.96	Right	4	R-L	Unshod	0.2	3.326	-119.207	-256.14	1769.2	1791.62	0.144777
701	449.96	Right	4	R-L	Unshod	0.25	3.364	-142.184	-230.313	1931.86	1950.72	0.119219
701	449.96	Right	4	R-L	Unshod	0.3	3.402	-152.424	-213.933	2108.95	2125.24	0.101441
701	449.96	Right	4	R-L	Unshod	0.35	3.44	-168.313	-171.394	2201.87	2214.94	0.0778401
701	449.96	Right	4	R-L	Unshod	0.4	3.478	-166.001	-119.772	2255.24	2264.51	0.0531083
701	449.96	Right	4	R-L	Unshod	0.45	3.516	-142.192	-65.435	2360.44	2365.62	0.0277216
701	449.96	Right	4	R-L	Unshod	0.5	3.554	-124.934	3.64	2553.91	2556.97	0.00142527
701	449.96	Right	4	R-L	Unshod	0.55	3.592	-96.074	104.142	2735.11	2738.78	0.038076
701	449.96	Right	4	R-L	Unshod	0.6	3.63	-71.765	218.922	2752.04	2761.67	0.079549
701	449.96	Right	4	R-L	Unshod	0.65	3.668	-54.305	298.006	2631.37	2648.75	0.113251
701	449.96	Right	4	R-L	Unshod	0.7	3.706	-45.068	351.486	2361.43	2387.87	0.148845
701	449.96	Right	4	R-L	Unshod	0.75	3.744	-40.218	358.217	2062.74	2094	0.173661
701	449.96	Right	4	R-L	Unshod	0.8	3.782	-33.706	340.975	1728.88	1762.51	0.197223
701	449.96	Right	4	R-L	Unshod	0.85	3.82	-23.322	239.192	1225.71	1249.05	0.195146
701	449.96	Right	4	R-L	Unshod	0.9	3.858	8.745	132.713	836.202	846.713	0.158709
701	449.96	Right	4	R-L	Unshod	0.95	3.896	19.485	109.847	486.702	499.324	0.225697
701	449.96	Right	4	R-L	Unshod	1	3.934	3.852	7.839	11.801	14.6817	0.664266
701	449.96	Right	5	L-R	Unshod	0	3.348	61.071	-17.417	112.962	129.589	0.154185	3036.39	2200	0.579863	0.420137
701	449.96	Right	5	L-R	Unshod	0.05	3.38845	1.238	79.792	467.219	473.985	0.170781
701	449.96	Right	5	L-R	Unshod	0.1	3.4289	21.371	200.122	1129.32	1147.12	0.177205
701	449.96	Right	5	L-R	Unshod	0.15	3.46935	39.746	257.019	1495.88	1518.32	0.171818
701	449.96	Right	5	L-R	Unshod	0.2	3.5098	75.934	262.828	1790.91	1811.69	0.146757
701	449.96	Right	5	L-R	Unshod	0.25	3.55025	89.917	229.835	2001.32	2016.48	0.114842
701	449.96	Right	5	L-R	Unshod	0.3	3.5907	94.861	206.417	2141.24	2153.26	0.0964006
701	449.96	Right	5	L-R	Unshod	0.35	3.63115	95.183	169.016	2202.76	2211.28	0.0767293
701	449.96	Right	5	L-R	Unshod	0.4	3.6716	91.479	108.521	2265.7	2270.14	0.0478974
701	449.96	Right	5	L-R	Unshod	0.45	3.71205	75.498	46.723	2399.89	2401.53	0.0194688
701	449.96	Right	5	L-R	Unshod	0.5	3.7525	43.169	-31.159	2650.93	2651.46	0.011754
701	449.96	Right	5	L-R	Unshod	0.55	3.79295	9.382	-136.806	2852.07	2855.36	0.0479673
701	449.96	Right	5	L-R	Unshod	0.6	3.8334	-10.098	-246.316	2871.75	2882.31	0.0857721
701	449.96	Right	5	L-R	Unshod	0.65	3.87385	-22.37	-327.063	2688.66	2708.57	0.121645
701	449.96	Right	5	L-R	Unshod	0.7	3.9143	-18.323	-366.115	2366.77	2394.99	0.15469
701	449.96	Right	5	L-R	Unshod	0.75	3.95475	-8.965	-353.429	1974.53	2005.93	0.178994
701	449.96	Right	5	L-R	Unshod	0.8	3.9952	1.275	-268.305	1425.61	1450.64	0.188204
701	449.96	Right	5	L-R	Unshod	0.85	4.03565	-17.392	-145.136	947.585	958.793	0.153164
701	449.96	Right	5	L-R	Unshod	0.9	4.0761	-37.718	-120.781	607.432	620.471	0.198839
701	449.96	Right	5	L-R	Unshod	0.95	4.11655	-7.249	-19.201	32.396	38.3501	0.592697
701	449.96	Right	5	L-R	Unshod	1	4.157	-0.581	-1.184	2.682	2.98874	0.441462
701	449.96	Right	6	L-R	Unshod	0	2.896	-1.104	2.48	50	50.0736	0.0496	3110.37	2313	0.573513	0.426487
701	449.96	Right	6	L-R	Unshod	0.05	2.935	18.305	-7.7	190.521	191.553	0.0404155
701	449.96	Right	6	L-R	Unshod	0.1	2.974	17.747	89.431	778.514	783.835	0.114874
701	449.96	Right	6	L-R	Unshod	0.15	3.013	48.205	228.143	1353.56	1373.5	0.16855
701	449.96	Right	6	L-R	Unshod	0.2	3.052	69.231	255.692	1711.64	1732.02	0.149384
701	449.96	Right	6	L-R	Unshod	0.25	3.091	92.843	237.382	1943.46	1960.11	0.122144
701	449.96	Right	6	L-R	Unshod	0.3	3.13	105.383	212.85	2146.92	2160.02	0.0991418
701	449.96	Right	6	L-R	Unshod	0.35	3.169	108.327	182.777	2251.91	2261.91	0.0811655
701	449.96	Right	6	L-R	Unshod	0.4	3.208	107.289	130.523	2349.1	2355.17	0.0555629
701	449.96	Right	6	L-R	Unshod	0.45	3.247	93.984	70.144	2455.3	2458.1	0.0285683
701	449.96	Right	6	L-R	Unshod	0.5	3.286	51.278	9.169	2625.77	2626.29	0.00349193
701	449.96	Right	6	L-R	Unshod	0.55	3.325	10.365	-73.269	2800.39	2801.37	0.0261638
701	449.96	Right	6	L-R	Unshod	0.6	3.364	-18.222	-157.434	2816.88	2821.33	0.0558896
701	449.96	Right	6	L-R	Unshod	0.65	3.403	-40.386	-241.68	2657.67	2668.94	0.0909368
701	449.96	Right	6	L-R	Unshod	0.7	3.442	-49.779	-291.965	2405.71	2423.88	0.121363
701	449.96	Right	6	L-R	Unshod	0.75	3.481	-47.497	-313.139	2103.55	2127.26	0.148862
701	449.96	Right	6	L-R	Unshod	0.8	3.52	-40.515	-308.164	1786.46	1813.3	0.1725
701	449.96	Right	6	L-R	Unshod	0.85	3.559	-34.537	-243.824	1393.21	1414.81	0.175009
701	449.96	Right	6	L-R	Unshod	0.9	3.598	-41.502	-132.882	933.873	944.192	0.142291
701	449.96	Right	6	L-R	Unshod	0.95	3.637	-54.291	-126.283	592.216	607.959	0.213238
701	449.96	Right	6	L-R	Unshod	1	3.676	0.784	1.843	2.365	3.09912	0.779281
544	650.9	Left	1	R-L	Egg-bar	0	1.204	-99.186	27.634	358.613	373.102	0.077058	3153.8	2440
544	650.9	Left	1	R-L	Egg-bar	0.05	1.24375	-229.692	-2.511	981.188	1007.72	0.00255914
544	650.9	Left	1	R-L	Egg-bar	0.1	1.2835	-346.041	17.055	1840.47	1872.8	0.00926666
544	650.9	Left	1	R-L	Egg-bar	0.15	1.32325	-401.176	68.723	2351.97	2386.93	0.0292193
544	650.9	Left	1	R-L	Egg-bar	0.2	1.363	-395.552	113.482	2665.44	2697.02	0.0425753
544	650.9	Left	1	R-L	Egg-bar	0.25	1.40275	-352.209	138.811	2839.35	2864.48	0.0488883
544	650.9	Left	1	R-L	Egg-bar	0.3	1.4425	-318.618	145.128	2953.91	2974.58	0.0491309
544	650.9	Left	1	R-L	Egg-bar	0.35	1.48225	-262.95	163.356	2997.33	3013.27	0.0545005
544	650.9	Left	1	R-L	Egg-bar	0.4	1.522	-178.024	167.471	3065.22	3074.95	0.0546358
544	650.9	Left	1	R-L	Egg-bar	0.45	1.56175	-76.726	158.016	3195.88	3200.71	0.0494436
544	650.9	Left	1	R-L	Egg-bar	0.5	1.6015	25.803	128.652	3432.92	3435.42	0.037476
544	650.9	Left	1	R-L	Egg-bar	0.55	1.64125	144.049	90.9	3764.5	3768.35	0.0241467
544	650.9	Left	1	R-L	Egg-bar	0.6	1.681	292.266	61.45	4010.17	4021.28	0.0153235
544	650.9	Left	1	R-L	Egg-bar	0.65	1.72075	424.357	32.712	3982.78	4005.45	0.00821337
544	650.9	Left	1	R-L	Egg-bar	0.7	1.7605	523.826	22.781	3698.87	3735.84	0.00615891
544	650.9	Left	1	R-L	Egg-bar	0.75	1.80025	556.924	20.126	3215.12	3263.06	0.0062598
544	650.9	Left	1	R-L	Egg-bar	0.8	1.84	486.759	26.251	2551.36	2597.51	0.010289
544	650.9	Left	1	R-L	Egg-bar	0.85	1.87975	364.819	6.575	1950.41	1984.25	0.00337108
544	650.9	Left	1	R-L	Egg-bar	0.9	1.9195	257.973	-17.356	1395.11	1418.87	0.0124406
544	650.9	Left	1	R-L	Egg-bar	0.95	1.95925	197.325	-45.74	886.048	908.906	0.0516225
544	650.9	Left	1	R-L	Egg-bar	1	1.999	14.323	-5.32	14.043	20.7523	0.378836
544	650.9	Left	3	L-R	Egg-bar	0	2.501	45.353	87.932	391.046	403.368	0.224864	3198.84	2253
544	650.9	Left	3	L-R	Egg-bar	0.05	2.5384	173.094	-4.979	832.155	849.981	0.00598326
544	650.9	Left	3	L-R	Egg-bar	0.1	2.5758	347.662	9.764	1695.87	1731.16	0.00575753
544	650.9	Left	3	L-R	Egg-bar	0.15	2.6132	397.825	-43.875	2127.22	2164.55	0.0206255
544	650.9	Left	3	L-R	Egg-bar	0.2	2.6506	389.369	-82.729	2482.97	2514.68	0.0333185
544	650.9	Left	3	L-R	Egg-bar	0.25	2.688	352.492	-125.482	2694.94	2720.79	0.0465621
544	650.9	Left	3	L-R	Egg-bar	0.3	2.7254	292.583	-151.813	2925.42	2943.93	0.0518945
544	650.9	Left	3	L-R	Egg-bar	0.35	2.7628	257.828	-159.738	3025.23	3040.4	0.0528019
544	650.9	Left	3	L-R	Egg-bar	0.4	2.8002	189.799	-175.737	3087.3	3098.12	0.0569226
544	650.9	Left	3	L-R	Egg-bar	0.45	2.8376	95.941	-187.129	3128.33	3135.39	0.0598176
544	650.9	Left	3	L-R	Egg-bar	0.5	2.875	-14.978	-194.227	3299.18	3304.92	0.0588713
544	650.9	Left	3	L-R	Egg-bar	0.55	2.9124	-126.311	-177.211	3588.41	3595	0.0493843
544	650.9	Left	3	L-R	Egg-bar	0.6	2.9498	-264.686	-161.019	3874.25	3886.62	0.0415613
544	650.9	Left	3	L-R	Egg-bar	0.65	2.9872	-418.592	-153.035	3929.74	3954.93	0.0389428
544	650.9	Left	3	L-R	Egg-bar	0.7	3.0246	-516.652	-144.001	3694.46	3733.19	0.0389775
544	650.9	Left	3	L-R	Egg-bar	0.75	3.062	-543.689	-129.95	3144.64	3193.94	0.0413243
544	650.9	Left	3	L-R	Egg-bar	0.8	3.0994	-466.023	-112.614	2488.55	2534.31	0.0452528
544	650.9	Left	3	L-R	Egg-bar	0.85	3.1368	-288.586	-56.888	1693.31	1718.67	0.0335957
544	650.9	Left	3	L-R	Egg-bar	0.9	3.1742	-237.174	-28.816	1269.74	1292.02	0.0226944
544	650.9	Left	3	L-R	Egg-bar	0.95	3.2116	-195.279	-3.76	749.544	774.574	0.00501638
544	650.9	Left	3	L-R	Egg-bar	1	3.249	-5.017	-4.858	5	8.58897	0.9716
544	650.9	Left	5	R-L	Egg-bar	0	2.224	-21.666	-37.619	313.756	316.745	0.119899	3236.01	2345
544	650.9	Left	5	R-L	Egg-bar	0.05	2.2623	-170.671	28.149	844.176	861.716	0.0333449
544	650.9	Left	5	R-L	Egg-bar	0.1	2.3006	-333.84	4.827	1729.77	1761.69	0.00279055
544	650.9	Left	5	R-L	Egg-bar	0.15	2.3389	-421.037	61.799	2237.21	2277.33	0.0276232
544	650.9	Left	5	R-L	Egg-bar	0.2	2.3772	-401.967	108.859	2590.85	2624.1	0.0420167
544	650.9	Left	5	R-L	Egg-bar	0.25	2.4155	-354.025	115.059	2848.37	2872.6	0.0403946
544	650.9	Left	5	R-L	Egg-bar	0.3	2.4538	-330.124	138.444	3015.61	3036.78	0.0459091
544	650.9	Left	5	R-L	Egg-bar	0.35	2.4921	-272.323	155.61	3108.45	3124.24	0.0500603
544	650.9	Left	5	R-L	Egg-bar	0.4	2.5304	-177.933	168.57	3122.96	3132.57	0.0539776
544	650.9	Left	5	R-L	Egg-bar	0.45	2.5687	-74.191	168.684	3177.61	3182.94	0.0530852
544	650.9	Left	5	R-L	Egg-bar	0.5	2.607	39.133	138.053	3362.74	3365.8	0.0410538
544	650.9	Left	5	R-L	Egg-bar	0.55	2.6453	156.198	74.417	3698.77	3702.81	0.0201194
544	650.9	Left	5	R-L	Egg-bar	0.6	2.6836	289.176	28.201	3927.76	3938.5	0.00717991
544	650.9	Left	5	R-L	Egg-bar	0.65	2.7219	428.917	-7.578	3927.22	3950.58	0.00192961
544	650.9	Left	5	R-L	Egg-bar	0.7	2.7602	522.924	-22.548	3635.01	3672.5	0.00620301
544	650.9	Left	5	R-L	Egg-bar	0.75	2.7985	523.641	-13.147	3143.7	3187.04	0.00418202
544	650.9	Left	5	R-L	Egg-bar	0.8	2.8368	465.039	6.711	2506.71	2549.49	0.00267722
544	650.9	Left	5	R-L	Egg-bar	0.85	2.8751	373.473	-15.125	1905.52	1941.83	0.00793749
544	650.9	Left	5	R-L	Egg-bar	0.9	2.9134	269.758	-34.14	1432.79	1458.37	0.0238276
544	650.9	Left	5	R-L	Egg-bar	0.95	2.9517	209.232	-60.786	875.395	902.103	0.0694384
544	650.9	Left	5	R-L	Egg-bar	1	2.99	0.601	0.902	-2.092	2.35611	0.431166
544	650.9	Left	6	R-L	Egg-bar	0	4.074	-54.758	-16.151	336.115	340.929	0.048052	3222.42	2432
544	650.9	Left	6	R-L	Egg-bar	0.05	4.11165	-198.428	0.804	883.414	905.425	0.000910106
544	650.9	Left	6	R-L	Egg-bar	0.1	4.1493	-327.958	-34.165	1649.68	1682.31	0.0207101
544	650.9	Left	6	R-L	Egg-bar	0.15	4.18695	-423.366	43.561	2263.22	2302.89	0.0192474
544	650.9	Left	6	R-L	Egg-bar	0.2	4.2246	-428.781	85.604	2616.77	2653.05	0.0327136
544	650.9	Left	6	R-L	Egg-bar	0.25	4.26225	-401.709	121.954	2929.81	2959.73	0.0416252
544	650.9	Left	6	R-L	Egg-bar	0.3	4.2999	-363.376	116.562	3152.9	3175.91	0.0369698
544	650.9	Left	6	R-L	Egg-bar	0.35	4.33755	-301.084	129.666	3178.83	3195.69	0.0407905
544	650.9	Left	6	R-L	Egg-bar	0.4	4.3752	-211.446	164.383	3043.44	3055.21	0.0540122
544	650.9	Left	6	R-L	Egg-bar	0.45	4.41285	-110.759	171.198	2984.85	2991.81	0.0573557
544	650.9	Left	6	R-L	Egg-bar	0.5	4.4505	-4.275	166.041	3129.88	3134.28	0.0530503
544	650.9	Left	6	R-L	Egg-bar	0.55	4.48815	100.542	118.042	3480	3483.45	0.0339201
544	650.9	Left	6	R-L	Egg-bar	0.6	4.5258	267.534	59.963	3848.79	3858.55	0.0155797
544	650.9	Left	6	R-L	Egg-bar	0.65	4.56345	411.197	25.788	3951.45	3972.87	0.00652621
544	650.9	Left	6	R-L	Egg-bar	0.7	4.6011	539.524	5.302	3762.27	3800.76	0.00140925
544	650.9	Left	6	R-L	Egg-bar	0.75	4.63875	569.779	4.323	3341.45	3389.68	0.00129375
544	650.9	Left	6	R-L	Egg-bar	0.8	4.6764	507.229	10.114	2681.35	2728.93	0.00377198
544	650.9	Left	6	R-L	Egg-bar	0.85	4.71405	421.652	-8.064	2118.63	2160.2	0.00380623
544	650.9	Left	6	R-L	Egg-bar	0.9	4.7517	301.64	-36.429	1513.48	1543.68	0.0240696
544	650.9	Left	6	R-L	Egg-bar	0.95	4.78935	243.238	-53.62	980.554	1011.69	0.0546834
544	650.9	Left	6	R-L	Egg-bar	1	4.827	3.735	0.827	1	3.954	0.827
544	650.9	Left	8	L-R	Egg-bar	0	1.874	30.795	99.29	344.385	359.733	0.288311	3252.27	2387
544	650.9	Left	8	L-R	Egg-bar	0.05	1.9094	202.806	15.298	841.381	865.613	0.018182
544	650.9	Left	8	L-R	Egg-bar	0.1	1.9448	344.086	31.541	1643.4	1679.33	0.0191926
544	650.9	Left	8	L-R	Egg-bar	0.15	1.9802	451.107	-50.13	2336.34	2380.02	0.0214567
544	650.9	Left	8	L-R	Egg-bar	0.2	2.0156	456.373	-103.6	2692.23	2732.6	0.0384811
544	650.9	Left	8	L-R	Egg-bar	0.25	2.051	432.811	-148.231	2972.17	3007.17	0.0498731
544	650.9	Left	8	L-R	Egg-bar	0.3	2.0864	372.452	-155.704	3128.45	3154.39	0.0497703
544	650.9	Left	8	L-R	Egg-bar	0.35	2.1218	307.564	-159.187	3112.61	3131.81	0.0511427
544	650.9	Left	8	L-R	Egg-bar	0.4	2.1572	234.641	-163.597	3044.69	3058.1	0.0537318
544	650.9	Left	8	L-R	Egg-bar	0.45	2.1926	146.173	-154.78	3082.12	3089.47	0.0502186
544	650.9	Left	8	L-R	Egg-bar	0.5	2.228	48.685	-124.459	3310.15	3312.84	0.0375992
544	650.9	Left	8	L-R	Egg-bar	0.55	2.2634	-73.985	-89.222	3669.17	3671	0.0243167
544	650.9	Left	8	L-R	Egg-bar	0.6	2.2988	-224.554	-65.539	3974.85	3981.73	0.0164884
544	650.9	Left	8	L-R	Egg-bar	0.65	2.3342	-373.78	-49.788	4053.94	4071.44	0.0122814
544	650.9	Left	8	L-R	Egg-bar	0.7	2.3696	-489.715	-42.592	3845.5	3876.79	0.0110758
544	650.9	Left	8	L-R	Egg-bar	0.75	2.405	-543.896	-45.216	3277.62	3322.75	0.0137954
544	650.9	Left	8	L-R	Egg-bar	0.8	2.4404	-475.86	-49.763	2542.75	2587.37	0.0195706
544	650.9	Left	8	L-R	Egg-bar	0.85	2.4758	-332.375	-21.778	1808.04	1838.47	0.0120451
544	650.9	Left	8	L-R	Egg-bar	0.9	2.5112	-240.231	3.324	1286.06	1308.31	0.00258464
544	650.9	Left	8	L-R	Egg-bar	0.95	2.5466	-194.853	11.987	790.432	814.183	0.0151651
544	650.9	Left	8	L-R	Egg-bar	1	2.582	-11.666	-1.674	4.595	12.6496	0.364309
544	650.9	Right	1	L-R	Egg-bar	0	2.131	155.593	-87.158	464.303	497.376	0.187718	3334.86	2480
544	650.9	Right	1	L-R	Egg-bar	0.05	2.16685	290.567	-17.866	1012.04	1053.08	0.0176535
544	650.9	Right	1	L-R	Egg-bar	0.1	2.2027	372.879	-25.791	1677.83	1718.96	0.0153716
544	650.9	Right	1	L-R	Egg-bar	0.15	2.23855	427.939	-20.383	2347.19	2385.97	0.00868401
544	650.9	Right	1	L-R	Egg-bar	0.2	2.2744	523.276	68.501	2828.12	2876.93	0.0242214
544	650.9	Right	1	L-R	Egg-bar	0.25	2.31025	528.958	107.357	3218.89	3263.83	0.0333522
544	650.9	Right	1	L-R	Egg-bar	0.3	2.3461	480.189	132.684	3318.02	3355.21	0.0399889
544	650.9	Right	1	L-R	Egg-bar	0.35	2.38195	394.147	154.446	3273.53	3300.79	0.0471803
544	650.9	Right	1	L-R	Egg-bar	0.4	2.4178	295.244	164.343	3248.88	3266.4	0.0505846
544	650.9	Right	1	L-R	Egg-bar	0.45	2.45365	203.863	140.773	3333.26	3342.45	0.0422328
544	650.9	Right	1	L-R	Egg-bar	0.5	2.4895	98.568	91.639	3622.92	3625.42	0.0252942
544	650.9	Right	1	L-R	Egg-bar	0.55	2.52535	-50.795	30.777	4073.5	4073.93	0.00755543
544	650.9	Right	1	L-R	Egg-bar	0.6	2.5612	-212.038	-9.713	4267.11	4272.39	0.00227625
544	650.9	Right	1	L-R	Egg-bar	0.65	2.59705	-363.831	-31.55	4169.08	4185.05	0.00756762
544	650.9	Right	1	L-R	Egg-bar	0.7	2.6329	-480.365	-40.532	3802.58	3833.01	0.0106591
544	650.9	Right	1	L-R	Egg-bar	0.75	2.66875	-526.724	-40.026	3237.8	3280.61	0.0123621
544	650.9	Right	1	L-R	Egg-bar	0.8	2.7046	-464.841	-28.607	2537.91	2580.29	0.0112719
544	650.9	Right	1	L-R	Egg-bar	0.85	2.74045	-326.857	-29.428	1773.97	1804.08	0.0165887
544	650.9	Right	1	L-R	Egg-bar	0.9	2.7763	-270.729	-27.894	1303.88	1331.98	0.021393
544	650.9	Right	1	L-R	Egg-bar	0.95	2.81215	-205.404	-26.24	782.987	809.906	0.0335127
544	650.9	Right	1	L-R	Egg-bar	1	2.848	-9.541	8.178	10	16.0596	0.8178
544	650.9	Right	3	L-R	Egg-bar	0	2.338	92.71	-61.184	383.273	399.045	0.159636	3165.39	2610
544	650.9	Right	3	L-R	Egg-bar	0.05	2.37445	261.566	23.517	899.51	937.064	0.0261442
544	650.9	Right	3	L-R	Egg-bar	0.1	2.4109	353.399	78.986	1637.87	1677.43	0.0482247
544	650.9	Right	3	L-R	Egg-bar	0.15	2.44735	424.674	93.196	2321.77	2362.13	0.0401401
544	650.9	Right	3	L-R	Egg-bar	0.2	2.4838	454.568	218.225	2691.77	2738.59	0.0810713
544	650.9	Right	3	L-R	Egg-bar	0.25	2.52025	434.993	276.516	3109.45	3151.88	0.0889277
544	650.9	Right	3	L-R	Egg-bar	0.3	2.5567	394.874	293.072	3269.62	3306.39	0.0896349
544	650.9	Right	3	L-R	Egg-bar	0.35	2.59315	342.945	307.965	3298.79	3330.83	0.093357
544	650.9	Right	3	L-R	Egg-bar	0.4	2.6296	253.896	315.126	3267.66	3292.62	0.0964378
544	650.9	Right	3	L-R	Egg-bar	0.45	2.66605	134.418	292.305	3326.08	3341.61	0.0878827
544	650.9	Right	3	L-R	Egg-bar	0.5	2.7025	23.194	264.253	3551.91	3561.8	0.0743975
544	650.9	Right	3	L-R	Egg-bar	0.55	2.73895	-114.239	219.707	3889.99	3897.86	0.0564801
544	650.9	Right	3	L-R	Egg-bar	0.6	2.7754	-276.104	155.857	4118.08	4130.27	0.037847
544	650.9	Right	3	L-R	Egg-bar	0.65	2.81185	-403.932	112.249	4033.95	4055.67	0.0278261
544	650.9	Right	3	L-R	Egg-bar	0.7	2.8483	-490.832	71.498	3697.15	3730.27	0.0193387
544	650.9	Right	3	L-R	Egg-bar	0.75	2.88475	-511.495	44.18	3157.2	3198.67	0.0139934
544	650.9	Right	3	L-R	Egg-bar	0.8	2.9212	-441.541	23.53	2404.72	2445.04	0.00978491
544	650.9	Right	3	L-R	Egg-bar	0.85	2.95765	-293.655	-10.317	1716.49	1741.46	0.00601052
544	650.9	Right	3	L-R	Egg-bar	0.9	2.9941	-256.824	-25.276	1304.4	1329.69	0.0193774
544	650.9	Right	3	L-R	Egg-bar	0.95	3.03055	-192.05	-30.582	735.768	761.034	0.0415647
544	650.9	Right	3	L-R	Egg-bar	1	3.067	-6.854	-0.074	-6.039	9.13522	0.0122537
544	650.9	Right	4	R-L	Egg-bar	0	1.394	-117.499	61.984	424.117	444.436	0.146148	3469.88	2553
544	650.9	Right	4	R-L	Egg-bar	0.05	1.4322	-269.806	-18.905	1016.54	1051.91	0.0185973
544	650.9	Right	4	R-L	Egg-bar	0.1	1.4704	-468.55	-33.555	1888.91	1946.45	0.0177642
544	650.9	Right	4	R-L	Egg-bar	0.15	1.5086	-523.411	-77.648	2381.25	2439.33	0.0326081
544	650.9	Right	4	R-L	Egg-bar	0.2	1.5468	-547.019	-145.451	2907.62	2962.2	0.050024
544	650.9	Right	4	R-L	Egg-bar	0.25	1.585	-517.88	-184.682	3237.06	3283.42	0.0570524
544	650.9	Right	4	R-L	Egg-bar	0.3	1.6232	-485.922	-210.134	3438.54	3479.06	0.0611114
544	650.9	Right	4	R-L	Egg-bar	0.35	1.6614	-407.409	-230.072	3464.74	3496.19	0.0664039
544	650.9	Right	4	R-L	Egg-bar	0.4	1.6996	-307.141	-228.447	3390.56	3412.1	0.0673773
544	650.9	Right	4	R-L	Egg-bar	0.45	1.7378	-181.856	-203.654	3353.76	3364.85	0.0607241
544	650.9	Right	4	R-L	Egg-bar	0.5	1.776	-67.004	-170.283	3530.79	3535.53	0.048228
544	650.9	Right	4	R-L	Egg-bar	0.55	1.8142	57.54	-132.696	3873.59	3876.29	0.0342566
544	650.9	Right	4	R-L	Egg-bar	0.6	1.8524	226.238	-110.916	4136.63	4144.29	0.0268131
544	650.9	Right	4	R-L	Egg-bar	0.65	1.8906	390.673	-89.579	4101.05	4120.59	0.0218429
544	650.9	Right	4	R-L	Egg-bar	0.7	1.9288	499.337	-73.854	3823.01	3856.19	0.0193183
544	650.9	Right	4	R-L	Egg-bar	0.75	1.967	554.975	-62.474	3277.6	3324.84	0.0190609
544	650.9	Right	4	R-L	Egg-bar	0.8	2.0052	497.243	-54.707	2557.51	2605.97	0.0213907
544	650.9	Right	4	R-L	Egg-bar	0.85	2.0434	359.035	-34.571	1878.15	1912.47	0.0184069
544	650.9	Right	4	R-L	Egg-bar	0.9	2.0816	310.287	-16.71	1393.28	1427.51	0.0119933
544	650.9	Right	4	R-L	Egg-bar	0.95	2.1198	242.017	-4.108	908.575	940.265	0.00452137
544	650.9	Right	4	R-L	Egg-bar	1	2.158	8.043	-2.738	5.461	10.1	0.501373
544	650.9	Right	6	R-L	Egg-bar	0	1.777	-147.904	39.836	439.187	465.132	0.090704	3779.54	2632
544	650.9	Right	6	R-L	Egg-bar	0.05	1.816	-258.225	-13.151	988.903	1022.15	0.0132986
544	650.9	Right	6	R-L	Egg-bar	0.1	1.855	-454.201	-0.271	1845.31	1900.38	0.000146859
544	650.9	Right	6	R-L	Egg-bar	0.15	1.894	-469.043	-6.15	2455.28	2499.69	0.0025048
544	650.9	Right	6	R-L	Egg-bar	0.2	1.933	-523.051	-103.406	2898.64	2947.27	0.035674
544	650.9	Right	6	R-L	Egg-bar	0.25	1.972	-511.752	-143.362	3223.69	3267.21	0.0444713
544	650.9	Right	6	R-L	Egg-bar	0.3	2.011	-464.958	-173.68	3304.41	3341.48	0.05256
544	650.9	Right	6	R-L	Egg-bar	0.35	2.05	-371.64	-191.855	3217.2	3244.27	0.0596341
544	650.9	Right	6	R-L	Egg-bar	0.4	2.089	-269.271	-190.497	3121.87	3139.25	0.0610202
544	650.9	Right	6	R-L	Egg-bar	0.45	2.128	-150.211	-162.678	3107.59	3115.46	0.0523487
544	650.9	Right	6	R-L	Egg-bar	0.5	2.167	-53.012	-122.434	3333.32	3335.98	0.0367304
544	650.9	Right	6	R-L	Egg-bar	0.55	2.206	80.929	-65.349	3751.39	3752.84	0.0174199
544	650.9	Right	6	R-L	Egg-bar	0.6	2.245	246.406	-29.991	4066.43	4074	0.00737526
544	650.9	Right	6	R-L	Egg-bar	0.65	2.284	390.251	-1.707	4091.16	4109.73	0.000417242
544	650.9	Right	6	R-L	Egg-bar	0.7	2.323	519.896	18.248	3795.81	3831.3	0.0048074
544	650.9	Right	6	R-L	Egg-bar	0.75	2.362	569.951	22.191	3255.96	3305.54	0.00681551
544	650.9	Right	6	R-L	Egg-bar	0.8	2.401	522.759	10.622	2597.41	2649.51	0.00408946
544	650.9	Right	6	R-L	Egg-bar	0.85	2.44	393.514	15.255	1884.91	1925.61	0.00809321
544	650.9	Right	6	R-L	Egg-bar	0.9	2.479	322.907	13.107	1410.47	1447.02	0.00929265
544	650.9	Right	6	R-L	Egg-bar	0.95	2.518	219.578	21.256	827.905	856.792	0.0256744
544	650.9	Right	6	R-L	Egg-bar	1	2.557	4.107	0.595	4.086	5.82382	0.145619
714	501.21	Left	4	L-R	Egg-bar	0	1.859	-42.416	-64.455	253.237	264.731	0.254524	4019.35	2635
714	501.21	Left	4	L-R	Egg-bar	0.05	1.8927	-286.058	-28.901	754.488	807.414	0.0383054
714	501.21	Left	4	L-R	Egg-bar	0.1	1.9264	-258.322	-14.965	1386.48	1410.42	0.0107935
714	501.21	Left	4	L-R	Egg-bar	0.15	1.9601	-327.922	43.886	1798.28	1828.46	0.0244044
714	501.21	Left	4	L-R	Egg-bar	0.2	1.9938	-323.891	65.023	2073.68	2099.83	0.0313563
714	501.21	Left	4	L-R	Egg-bar	0.25	2.0275	-310.493	99.009	2272.13	2295.39	0.0435754
714	501.21	Left	4	L-R	Egg-bar	0.3	2.0612	-311.221	97.118	2485.5	2506.79	0.0390738
714	501.21	Left	4	L-R	Egg-bar	0.35	2.0949	-281.439	111.156	2598.67	2616.23	0.0427741
714	501.21	Left	4	L-R	Egg-bar	0.4	2.1286	-220.592	111.035	2690.35	2701.66	0.0412716
714	501.21	Left	4	L-R	Egg-bar	0.45	2.1623	-137.254	128.105	2779.65	2785.98	0.0460868
714	501.21	Left	4	L-R	Egg-bar	0.5	2.196	-57.669	117.401	2927.54	2930.46	0.0401023
714	501.21	Left	4	L-R	Egg-bar	0.55	2.2297	27.718	103.198	3043.28	3045.16	0.0339101
714	501.21	Left	4	L-R	Egg-bar	0.6	2.2634	135.891	77.473	3091.46	3095.42	0.0250603
714	501.21	Left	4	L-R	Egg-bar	0.65	2.2971	240.773	50.384	2988.28	2998.38	0.0168606
714	501.21	Left	4	L-R	Egg-bar	0.7	2.3308	317.937	39.81	2718.4	2737.22	0.0146446
714	501.21	Left	4	L-R	Egg-bar	0.75	2.3645	324.356	45.132	2332.97	2355.84	0.0193453
714	501.21	Left	4	L-R	Egg-bar	0.8	2.3982	270.709	45.694	1814.95	1835.6	0.0251764
714	501.21	Left	4	L-R	Egg-bar	0.85	2.4319	168.507	19.756	1259.83	1271.2	0.0156815
714	501.21	Left	4	L-R	Egg-bar	0.9	2.4656	130.181	-21.175	899.611	909.228	0.023538
714	501.21	Left	4	L-R	Egg-bar	0.95	2.4993	131.187	-41.456	587.6	603.492	0.0705514
714	501.21	Left	4	L-R	Egg-bar	1	2.533	5.372	-3.071	6.402	8.90365	0.479694
714	501.21	Left	5	L-R	Egg-bar	0	1.533	-26.215	-6.335	48.409	55.4147	0.130864	3999.63	3138
714	501.21	Left	5	L-R	Egg-bar	0.05	1.567	-144.15	-81.245	449.865	479.331	0.180599
714	501.21	Left	5	L-R	Egg-bar	0.1	1.601	-262.665	-11.652	977.845	1012.58	0.011916
714	501.21	Left	5	L-R	Egg-bar	0.15	1.635	-335.141	19.891	1715.52	1748.06	0.0115947
714	501.21	Left	5	L-R	Egg-bar	0.2	1.669	-333.148	61.658	1960.6	1989.66	0.0314485
714	501.21	Left	5	L-R	Egg-bar	0.25	1.703	-360.341	104.511	2307.12	2337.43	0.0452993
714	501.21	Left	5	L-R	Egg-bar	0.3	1.737	-374.849	111.513	2629	2657.93	0.0424164
714	501.21	Left	5	L-R	Egg-bar	0.35	1.771	-321.461	133.398	2749.68	2771.62	0.048514
714	501.21	Left	5	L-R	Egg-bar	0.4	1.805	-248.414	133.892	2765.88	2780.23	0.0484085
714	501.21	Left	5	L-R	Egg-bar	0.45	1.839	-185.705	130.167	2777.86	2787.1	0.0468587
714	501.21	Left	5	L-R	Egg-bar	0.5	1.873	-113.151	120.07	2889.2	2893.91	0.0415582
714	501.21	Left	5	L-R	Egg-bar	0.55	1.907	-13.735	94.138	3030.55	3032.05	0.031063
714	501.21	Left	5	L-R	Egg-bar	0.6	1.941	94.307	51.231	3049.66	3051.55	0.0167989
714	501.21	Left	5	L-R	Egg-bar	0.65	1.975	204.609	12.501	2895.3	2902.55	0.00431769
714	501.21	Left	5	L-R	Egg-bar	0.7	2.009	266.405	-0.684	2593.14	2606.79	0.000263772
714	501.21	Left	5	L-R	Egg-bar	0.75	2.043	260.19	12.126	2098.97	2115.07	0.00577711
714	501.21	Left	5	L-R	Egg-bar	0.8	2.077	215.653	19.964	1637	1651.26	0.0121955
714	501.21	Left	5	L-R	Egg-bar	0.85	2.111	142.719	7.53	1161.07	1169.84	0.00648538
714	501.21	Left	5	L-R	Egg-bar	0.9	2.145	114.198	-30.21	863.937	871.975	0.0349678
714	501.21	Left	5	L-R	Egg-bar	0.95	2.179	126.05	-45.324	588.478	603.531	0.077019
714	501.21	Left	5	L-R	Egg-bar	1	2.213	4.58	1.726	4.493	6.64398	0.384153
714	501.21	Left	6	R-L	Egg-bar	0	2.337	121.963	-45.234	390.912	411.987	0.115714	4075.78	2816
714	501.21	Left	6	R-L	Egg-bar	0.05	2.373	333.619	10.1	861.928	924.296	0.0117179
714	501.21	Left	6	R-L	Egg-bar	0.1	2.409	346.94	14.027	1582.2	1619.85	0.0088655
714	501.21	Left	6	R-L	Egg-bar	0.15	2.445	403.429	-28.359	2036.75	2076.51	0.0139237
714	501.21	Left	6	R-L	Egg-bar	0.2	2.481	425.958	-76.271	2407.72	2446.29	0.0316778
714	501.21	Left	6	R-L	Egg-bar	0.25	2.517	403.041	-92.181	2631.27	2663.56	0.0350328
714	501.21	Left	6	R-L	Egg-bar	0.3	2.553	369.016	-93.407	2725.43	2751.88	0.0342724
714	501.21	Left	6	R-L	Egg-bar	0.35	2.589	302.579	-104.855	2697.1	2716.04	0.038877
714	501.21	Left	6	R-L	Egg-bar	0.4	2.625	209.41	-113.555	2661.26	2671.9	0.0426696
714	501.21	Left	6	R-L	Egg-bar	0.45	2.661	122.467	-112.348	2691.66	2696.79	0.0417392
714	501.21	Left	6	R-L	Egg-bar	0.5	2.697	38.429	-89.789	2792.24	2793.94	0.0321567
714	501.21	Left	6	R-L	Egg-bar	0.55	2.733	-53.454	-71.125	2967.48	2968.81	0.0239681
714	501.21	Left	6	R-L	Egg-bar	0.6	2.769	-156.614	-52.111	3133.12	3137.47	0.0166323
714	501.21	Left	6	R-L	Egg-bar	0.65	2.805	-284.651	-22.926	3157.63	3170.51	0.00726052
714	501.21	Left	6	R-L	Egg-bar	0.7	2.841	-374.304	-9.825	2976.88	3000.33	0.00330044
714	501.21	Left	6	R-L	Egg-bar	0.75	2.877	-392.029	-20.243	2557.67	2587.62	0.00791464
714	501.21	Left	6	R-L	Egg-bar	0.8	2.913	-333.337	-33.091	2024.26	2051.79	0.0163472
714	501.21	Left	6	R-L	Egg-bar	0.85	2.949	-251.513	-31.732	1513.41	1534.49	0.0209672
714	501.21	Left	6	R-L	Egg-bar	0.9	2.985	-190.934	6.993	1070.54	1087.45	0.00653224
714	501.21	Left	6	R-L	Egg-bar	0.95	3.021	-169.253	38.651	640.349	663.466	0.0603593
714	501.21	Left	6	R-L	Egg-bar	1	3.057	-1.668	-0.062	0.691	1.80653	0.089725
714	501.21	Left	8	R-L	Egg-bar	0	1.299	112.353	43.222	405.345	422.843	0.10663	4285.3	2696
714	501.21	Left	8	R-L	Egg-bar	0.05	1.3349	371.642	19.79	885.811	960.818	0.0223411
714	501.21	Left	8	R-L	Egg-bar	0.1	1.3708	402.504	9.802	1696.19	1743.33	0.00577882
714	501.21	Left	8	R-L	Egg-bar	0.15	1.4067	438.148	-42.914	2050.16	2096.89	0.0209321
714	501.21	Left	8	R-L	Egg-bar	0.2	1.4426	449.907	-93.679	2388.18	2432	0.039226
714	501.21	Left	8	R-L	Egg-bar	0.25	1.4785	440.412	-95.615	2614.17	2652.74	0.0365756
714	501.21	Left	8	R-L	Egg-bar	0.3	1.5144	399.642	-102.905	2688.1	2719.6	0.0382816
714	501.21	Left	8	R-L	Egg-bar	0.35	1.5503	312.136	-111.398	2655.66	2676.27	0.0419473
714	501.21	Left	8	R-L	Egg-bar	0.4	1.5862	225.486	-125.38	2674.28	2686.69	0.0468837
714	501.21	Left	8	R-L	Egg-bar	0.45	1.6221	140.096	-122.214	2766.25	2772.49	0.0441804
714	501.21	Left	8	R-L	Egg-bar	0.5	1.658	55.274	-101.572	2919.49	2921.78	0.034791
714	501.21	Left	8	R-L	Egg-bar	0.55	1.6939	-47.308	-75.368	3105.97	3107.24	0.0242655
714	501.21	Left	8	R-L	Egg-bar	0.6	1.7298	-153.762	-37.211	3215.19	3219.08	0.0115735
714	501.21	Left	8	R-L	Egg-bar	0.65	1.7657	-275.059	-3.616	3122.18	3134.27	0.00115817
714	501.21	Left	8	R-L	Egg-bar	0.7	1.8016	-346.65	5.294	2818.26	2839.51	0.00187846
714	501.21	Left	8	R-L	Egg-bar	0.75	1.8375	-333.339	-9.003	2304.99	2328.99	0.00390587
714	501.21	Left	8	R-L	Egg-bar	0.8	1.8734	-288.43	-24.542	1819.25	1842.14	0.0134902
714	501.21	Left	8	R-L	Egg-bar	0.85	1.9093	-207.511	-16.085	1345.38	1361.39	0.0119557
714	501.21	Left	8	R-L	Egg-bar	0.9	1.9452	-159.546	28.589	963.112	976.656	0.029684
714	501.21	Left	8	R-L	Egg-bar	0.95	1.9811	-148.059	53.8	591.519	612.136	0.0909523
714	501.21	Left	8	R-L	Egg-bar	1	2.017	-2.62	0.651	2.594	3.74393	0.250964
714	501.21	Right	1	L-R	Egg-bar	0	2.28	-99.456	20.866	331.214	346.453	0.0629985	4018.09	2878
714	501.21	Right	1	L-R	Egg-bar	0.05	2.31745	-321.737	-50.82	945.932	1000.44	0.0537248
714	501.21	Right	1	L-R	Egg-bar	0.1	2.3549	-262.981	-9.157	1568.39	1590.31	0.00583847
714	501.21	Right	1	L-R	Egg-bar	0.15	2.39235	-387.281	-121.526	2106.12	2144.88	0.0577014
714	501.21	Right	1	L-R	Egg-bar	0.2	2.4298	-401.058	-156.25	2392.92	2431.33	0.0652967
714	501.21	Right	1	L-R	Egg-bar	0.25	2.46725	-368.947	-185.447	2470.2	2504.48	0.0750736
714	501.21	Right	1	L-R	Egg-bar	0.3	2.5047	-325.936	-191.092	2464.19	2492.98	0.0775477
714	501.21	Right	1	L-R	Egg-bar	0.35	2.54215	-240.623	-198.531	2444.29	2464.12	0.0812224
714	501.21	Right	1	L-R	Egg-bar	0.4	2.5796	-168.731	-215.46	2522.21	2537.02	0.085425
714	501.21	Right	1	L-R	Egg-bar	0.45	2.61705	-80.512	-223.832	2696.07	2706.54	0.0830217
714	501.21	Right	1	L-R	Egg-bar	0.5	2.6545	1.278	-219.428	2881.38	2889.73	0.0761537
714	501.21	Right	1	L-R	Egg-bar	0.55	2.69195	102.898	-204.059	3104.27	3112.67	0.0657349
714	501.21	Right	1	L-R	Egg-bar	0.6	2.7294	205.852	-180.725	3223.23	3234.85	0.0560696
714	501.21	Right	1	L-R	Egg-bar	0.65	2.76685	320.578	-151.411	3127.91	3147.94	0.0484064
714	501.21	Right	1	L-R	Egg-bar	0.7	2.8043	379.582	-133.099	2814.82	2843.42	0.047285
714	501.21	Right	1	L-R	Egg-bar	0.75	2.84175	350.648	-126.113	2251.96	2282.58	0.0560015
714	501.21	Right	1	L-R	Egg-bar	0.8	2.8792	311.819	-118.811	1805.8	1836.37	0.0657942
714	501.21	Right	1	L-R	Egg-bar	0.85	2.91665	237.51	-83.369	1324.13	1347.84	0.0629613
714	501.21	Right	1	L-R	Egg-bar	0.9	2.9541	204.052	-27.324	1044.77	1064.86	0.0261531
714	501.21	Right	1	L-R	Egg-bar	0.95	2.99155	164.326	12.738	624.645	646.024	0.0203924
714	501.21	Right	1	L-R	Egg-bar	1	3.029	8.422	4.332	11.134	14.6172	0.389078
714	501.21	Right	2	L-R	Egg-bar	0	1.923	-126.157	-65.888	430.983	453.876	0.152878	3944.98	3025
714	501.21	Right	2	L-R	Egg-bar	0.05	1.9576	-316.306	-64.605	1020.04	1069.91	0.0633354
714	501.21	Right	2	L-R	Egg-bar	0.1	1.9922	-354.33	-18.519	1803.75	1838.32	0.0102669
714	501.21	Right	2	L-R	Egg-bar	0.15	2.0268	-385.924	-85.587	2206.34	2241.47	0.0387914
714	501.21	Right	2	L-R	Egg-bar	0.2	2.0614	-390.465	-131.903	2433.99	2468.64	0.0541921
714	501.21	Right	2	L-R	Egg-bar	0.25	2.096	-368.896	-141.737	2511.91	2542.81	0.0564259
714	501.21	Right	2	L-R	Egg-bar	0.3	2.1306	-311.378	-143.49	2465.91	2489.63	0.0581895
714	501.21	Right	2	L-R	Egg-bar	0.35	2.1652	-228.12	-166.362	2395.84	2412.41	0.069438
714	501.21	Right	2	L-R	Egg-bar	0.4	2.1998	-162.128	-175.589	2418.04	2429.82	0.0726163
714	501.21	Right	2	L-R	Egg-bar	0.45	2.2344	-85.173	-174.296	2569.47	2576.78	0.0678334
714	501.21	Right	2	L-R	Egg-bar	0.5	2.269	6.833	-174.552	2815.78	2821.19	0.0619906
714	501.21	Right	2	L-R	Egg-bar	0.55	2.3036	106.815	-155.142	3099.42	3105.14	0.0500552
714	501.21	Right	2	L-R	Egg-bar	0.6	2.3382	233.249	-136.191	3307.83	3318.84	0.0411723
714	501.21	Right	2	L-R	Egg-bar	0.65	2.3728	355.75	-110.657	3319.83	3340.67	0.0333321
714	501.21	Right	2	L-R	Egg-bar	0.7	2.4074	440.894	-99.348	3072.99	3106.04	0.0323295
714	501.21	Right	2	L-R	Egg-bar	0.75	2.442	431.755	-102.263	2571.94	2609.93	0.0397611
714	501.21	Right	2	L-R	Egg-bar	0.8	2.4766	397.699	-93.991	2047.23	2087.62	0.0459113
714	501.21	Right	2	L-R	Egg-bar	0.85	2.5112	282.355	-65.324	1477.23	1505.39	0.0442205
714	501.21	Right	2	L-R	Egg-bar	0.9	2.5458	232.261	-11.566	1075.23	1100.09	0.0107568
714	501.21	Right	2	L-R	Egg-bar	0.95	2.5804	175.543	31.595	605.037	630.78	0.0522199
714	501.21	Right	2	L-R	Egg-bar	1	2.615	2.979	0.034	1.223	3.22045	0.0278005
714	501.21	Right	3	R-L	Egg-bar	0	1.791	166.928	70.612	486.752	519.402	0.145068	3986.94	2987
714	501.21	Right	3	R-L	Egg-bar	0.05	1.826	310.935	39.607	992.432	1040.75	0.039909
714	501.21	Right	3	R-L	Egg-bar	0.1	1.861	385.108	-4.897	1805.86	1846.47	0.00271172
714	501.21	Right	3	R-L	Egg-bar	0.15	1.896	394.21	63.705	2147.06	2183.88	0.0296708
714	501.21	Right	3	R-L	Egg-bar	0.2	1.931	387.384	104.09	2424.06	2457.03	0.0429403
714	501.21	Right	3	R-L	Egg-bar	0.25	1.966	387.325	98.459	2626.47	2656.7	0.0374872
714	501.21	Right	3	R-L	Egg-bar	0.3	2.001	350.656	97.579	2676.59	2701.22	0.0364565
714	501.21	Right	3	R-L	Egg-bar	0.35	2.036	274.566	104.786	2634.9	2651.24	0.0397685
714	501.21	Right	3	R-L	Egg-bar	0.4	2.071	183.866	122.803	2628.11	2637.4	0.0467267
714	501.21	Right	3	R-L	Egg-bar	0.45	2.106	101.448	120.348	2727.87	2732.41	0.044118
714	501.21	Right	3	R-L	Egg-bar	0.5	2.141	21.949	96.805	2908.69	2910.38	0.0332813
714	501.21	Right	3	R-L	Egg-bar	0.55	2.176	-77.894	61.936	3128.55	3130.13	0.019797
714	501.21	Right	3	R-L	Egg-bar	0.6	2.211	-194.337	31.298	3266.2	3272.13	0.00958239
714	501.21	Right	3	R-L	Egg-bar	0.65	2.246	-302.425	8.756	3187.95	3202.27	0.0027466
714	501.21	Right	3	R-L	Egg-bar	0.7	2.281	-367.845	6.927	2875.64	2899.08	0.00240885
714	501.21	Right	3	R-L	Egg-bar	0.75	2.316	-351.029	26.021	2372.3	2398.27	0.0109687
714	501.21	Right	3	R-L	Egg-bar	0.8	2.351	-312.94	45.851	1891.72	1917.98	0.0242377
714	501.21	Right	3	R-L	Egg-bar	0.85	2.386	-257.557	29.73	1475.57	1498.17	0.0201482
714	501.21	Right	3	R-L	Egg-bar	0.9	2.421	-225.718	-1.228	1138.37	1160.53	0.00107874
714	501.21	Right	3	R-L	Egg-bar	0.95	2.456	-195.98	-48.769	692.505	721.353	0.070424
714	501.21	Right	3	R-L	Egg-bar	1	2.491	-2.248	0.554	0.855	2.46809	0.647953
714	501.21	Right	4	L-R	Egg-bar	0	1.912	-112.202	-39.466	369.248	387.932	0.106882	3991.86	2810
714	501.21	Right	4	L-R	Egg-bar	0.05	1.94675	-277.591	-55.445	907.728	950.842	0.0610811
714	501.21	Right	4	L-R	Egg-bar	0.1	1.9815	-209.909	4.241	1495.92	1510.59	0.00283504
714	501.21	Right	4	L-R	Egg-bar	0.15	2.01625	-351.569	-61.874	2050.54	2081.38	0.0301745
714	501.21	Right	4	L-R	Egg-bar	0.2	2.051	-353.191	-88.594	2320.74	2349.14	0.0381748
714	501.21	Right	4	L-R	Egg-bar	0.25	2.08575	-348.69	-105.867	2469.84	2496.58	0.0428639
714	501.21	Right	4	L-R	Egg-bar	0.3	2.1205	-301.786	-100.127	2506.99	2527.08	0.0399391
714	501.21	Right	4	L-R	Egg-bar	0.35	2.15525	-219.76	-111.589	2494.72	2506.86	0.0447301
714	501.21	Right	4	L-R	Egg-bar	0.4	2.19	-145.243	-106.486	2546.13	2552.49	0.0418227
714	501.21	Right	4	L-R	Egg-bar	0.45	2.22475	-82.52	-93.028	2678.51	2681.39	0.0347313
714	501.21	Right	4	L-R	Egg-bar	0.5	2.2595	6.329	-69.154	2949.58	2950.4	0.0234453
714	501.21	Right	4	L-R	Egg-bar	0.55	2.29425	118.962	-34.214	3286.06	3288.39	0.0104119
714	501.21	Right	4	L-R	Egg-bar	0.6	2.329	256.207	-3.448	3484.08	3493.49	0.000989645
714	501.21	Right	4	L-R	Egg-bar	0.65	2.36375	384.972	16.182	3416.42	3438.08	0.00473653
714	501.21	Right	4	L-R	Egg-bar	0.7	2.3985	456.165	8.645	3050.01	3083.95	0.00283442
714	501.21	Right	4	L-R	Egg-bar	0.75	2.43325	418.29	-22.218	2443.59	2479.23	0.00909236
714	501.21	Right	4	L-R	Egg-bar	0.8	2.468	344.66	-51.661	1884.57	1916.52	0.0274126
714	501.21	Right	4	L-R	Egg-bar	0.85	2.50275	295.52	-30.571	1480.08	1509.6	0.020655
714	501.21	Right	4	L-R	Egg-bar	0.9	2.5375	259.347	-6.443	1127.14	1156.61	0.00571621
714	501.21	Right	4	L-R	Egg-bar	0.95	2.57225	201.739	38.236	672.524	703.171	0.0568545
714	501.21	Right	4	L-R	Egg-bar	1	2.607	1.134	1.084	3.357	3.70546	0.322907
714	501.21	Right	6	L-R	Egg-bar	0	1.913	-128.733	-50.065	378.757	403.157	0.132182	3834.39	2777
714	501.21	Right	6	L-R	Egg-bar	0.05	1.9489	-349.316	-43.45	937.704	1001.6	0.0463366
714	501.21	Right	6	L-R	Egg-bar	0.1	1.9848	-235.863	-18.722	1483.05	1501.8	0.012624
714	501.21	Right	6	L-R	Egg-bar	0.15	2.0207	-411.839	-83.482	2158.8	2199.32	0.0386705
714	501.21	Right	6	L-R	Egg-bar	0.2	2.0566	-419.944	-109.804	2462.8	2500.75	0.0445851
714	501.21	Right	6	L-R	Egg-bar	0.25	2.0925	-402.877	-135.895	2588.15	2622.84	0.0525066
714	501.21	Right	6	L-R	Egg-bar	0.3	2.1284	-345.221	-138.587	2594.52	2621.05	0.0534153
714	501.21	Right	6	L-R	Egg-bar	0.35	2.1643	-265.99	-147.682	2558.71	2576.73	0.0577174
714	501.21	Right	6	L-R	Egg-bar	0.4	2.2002	-170.619	-148.176	2549.25	2559.25	0.0581252
714	501.21	Right	6	L-R	Egg-bar	0.45	2.2361	-90.722	-140.479	2661.62	2666.87	0.0527794
714	501.21	Right	6	L-R	Egg-bar	0.5	2.272	-5.831	-117.519	2856.78	2859.2	0.0411369
714	501.21	Right	6	L-R	Egg-bar	0.55	2.3079	89.455	-87.09	3080.92	3083.45	0.0282675
714	501.21	Right	6	L-R	Egg-bar	0.6	2.3438	201.431	-48.338	3247.29	3253.89	0.0148856
714	501.21	Right	6	L-R	Egg-bar	0.65	2.3797	312.672	-16.862	3217.59	3232.79	0.00524057
714	501.21	Right	6	L-R	Egg-bar	0.7	2.4156	391.317	-16.751	2867.7	2894.32	0.00584127
714	501.21	Right	6	L-R	Egg-bar	0.75	2.4515	375.494	-34.774	2352.36	2382.39	0.0147826
714	501.21	Right	6	L-R	Egg-bar	0.8	2.4874	325.795	-59.026	1862.29	1891.5	0.0316954
714	501.21	Right	6	L-R	Egg-bar	0.85	2.5233	280.454	-31.367	1445.94	1473.23	0.0216931
714	501.21	Right	6	L-R	Egg-bar	0.9	2.5592	233.799	-0.214	1084.1	1109.02	0.0001974
714	501.21	Right	6	L-R	Egg-bar	0.95	2.5951	171.098	47.256	579.648	606.217	0.0815253
714	501.21	Right	6	L-R	Egg-bar	1	2.631	0.477	-0.984	1	1.48182	0.984
528	585.13	Left	1	R-L	Egg-bar	0	1.207	-43.597	-7.991	73.862	86.1403	0.108188	3860.2	2905
528	585.13	Left	1	R-L	Egg-bar	0.05	1.2546	-145.133	58.84	427.109	454.915	0.137763
528	585.13	Left	1	R-L	Egg-bar	0.1	1.3022	-131.968	44.806	941.178	951.441	0.0476063
528	585.13	Left	1	R-L	Egg-bar	0.15	1.3498	-319.525	78.218	1798.42	1828.26	0.0434926
528	585.13	Left	1	R-L	Egg-bar	0.2	1.3974	-389.787	140.568	2429.96	2465.04	0.0578478
528	585.13	Left	1	R-L	Egg-bar	0.25	1.445	-434.332	157.379	2903.69	2940.21	0.0541996
528	585.13	Left	1	R-L	Egg-bar	0.3	1.4926	-407.241	168.22	3173.42	3203.86	0.0530091
528	585.13	Left	1	R-L	Egg-bar	0.35	1.5402	-340.243	170.308	3303.36	3325.2	0.051556
528	585.13	Left	1	R-L	Egg-bar	0.4	1.5878	-251.248	179.217	3297.08	3311.49	0.0543563
528	585.13	Left	1	R-L	Egg-bar	0.45	1.6354	-150.061	169.294	3284.68	3292.46	0.0515405
528	585.13	Left	1	R-L	Egg-bar	0.5	1.683	-61.242	153.844	3336.23	3340.34	0.0461131
528	585.13	Left	1	R-L	Egg-bar	0.55	1.7306	48.552	126.832	3488.75	3491.4	0.0363545
528	585.13	Left	1	R-L	Egg-bar	0.6	1.7782	165.126	106.454	3621.41	3626.73	0.0293958
528	585.13	Left	1	R-L	Egg-bar	0.65	1.8258	284.86	84.256	3551.23	3563.63	0.0237259
528	585.13	Left	1	R-L	Egg-bar	0.7	1.8734	362.584	60.339	3336.14	3356.33	0.0180865
528	585.13	Left	1	R-L	Egg-bar	0.75	1.921	439.929	47.926	3077.53	3109.19	0.0155729
528	585.13	Left	1	R-L	Egg-bar	0.8	1.9686	470.13	45.626	2749.63	2789.9	0.0165935
528	585.13	Left	1	R-L	Egg-bar	0.85	2.0162	386.677	31.248	2094.77	2130.39	0.0149171
528	585.13	Left	1	R-L	Egg-bar	0.9	2.0638	234.158	16.713	1396.5	1416.1	0.0119678
528	585.13	Left	1	R-L	Egg-bar	0.95	2.1114	156.378	-25.552	809.375	824.739	0.03157
528	585.13	Left	1	R-L	Egg-bar	1	2.159	6.952	-4.063	6.736	10.4982	0.603177
528	585.13	Left	2	R-L	Egg-bar	0	1.193	-29.855	3.757	59.188	66.3977	0.0634757	3094.33	2615
528	585.13	Left	2	R-L	Egg-bar	0.05	1.2382	-86.628	66.288	284.175	304.391	0.233265
528	585.13	Left	2	R-L	Egg-bar	0.1	1.2834	-246.793	51.137	920.711	954.584	0.0555408
528	585.13	Left	2	R-L	Egg-bar	0.15	1.3286	-356.564	36.261	1838.87	1873.47	0.0197192
528	585.13	Left	2	R-L	Egg-bar	0.2	1.3738	-408.483	120.752	2442.31	2479.18	0.0494417
528	585.13	Left	2	R-L	Egg-bar	0.25	1.419	-502.652	136.309	3072.05	3115.88	0.0443707
528	585.13	Left	2	R-L	Egg-bar	0.3	1.4642	-501.728	118.998	3484.5	3522.44	0.0341507
528	585.13	Left	2	R-L	Egg-bar	0.35	1.5094	-429.718	138.591	3630.36	3658.33	0.0381756
528	585.13	Left	2	R-L	Egg-bar	0.4	1.5546	-308.4	133.655	3530.42	3546.38	0.0378581
528	585.13	Left	2	R-L	Egg-bar	0.45	1.5998	-181.965	111.928	3318.32	3325.19	0.0337303
528	585.13	Left	2	R-L	Egg-bar	0.5	1.645	-69.104	81.161	3185.04	3186.82	0.025482
528	585.13	Left	2	R-L	Egg-bar	0.55	1.6902	19.079	44.642	3329.81	3330.17	0.0134068
528	585.13	Left	2	R-L	Egg-bar	0.6	1.7354	133.094	10.8	3572.5	3575	0.00302309
528	585.13	Left	2	R-L	Egg-bar	0.65	1.7806	258.136	-7.761	3627.15	3636.33	0.0021397
528	585.13	Left	2	R-L	Egg-bar	0.7	1.8258	372.809	-11.052	3532.31	3551.94	0.00312883
528	585.13	Left	2	R-L	Egg-bar	0.75	1.871	478.118	-12.201	3350.38	3384.35	0.00364167
528	585.13	Left	2	R-L	Egg-bar	0.8	1.9162	519.085	-5.546	2969.29	3014.33	0.00186779
528	585.13	Left	2	R-L	Egg-bar	0.85	1.9614	412.77	-2.068	2284.52	2321.52	0.000905221
528	585.13	Left	2	R-L	Egg-bar	0.9	2.0066	334.212	-10.306	1646.73	1680.33	0.00625846
528	585.13	Left	2	R-L	Egg-bar	0.95	2.0518	248.219	-33.153	991.75	1022.88	0.0334288
528	585.13	Left	2	R-L	Egg-bar	1	2.097	3.618	-1.579	0.663	4.00284	2.3816
528	585.13	Left	3	R-L	Egg-bar	0	1.433	-12.707	-12.366	61.501	64.0059	0.20107	3060.06	2636
528	585.13	Left	3	R-L	Egg-bar	0.05	1.4752	-136.672	99.998	444.214	475.4	0.225112
528	585.13	Left	3	R-L	Egg-bar	0.1	1.5174	-128.339	54.37	976.277	986.176	0.0556912
528	585.13	Left	3	R-L	Egg-bar	0.15	1.5596	-311.406	115.76	1836.65	1866.46	0.0630278
528	585.13	Left	3	R-L	Egg-bar	0.2	1.6018	-409.926	173.104	2505.33	2544.54	0.0690943
528	585.13	Left	3	R-L	Egg-bar	0.25	1.644	-445.563	206.778	2937.13	2977.93	0.0704013
528	585.13	Left	3	R-L	Egg-bar	0.3	1.6862	-402.708	224.498	3166.77	3200.15	0.0708919
528	585.13	Left	3	R-L	Egg-bar	0.35	1.7284	-328.23	217.041	3204.51	3228.58	0.0677299
528	585.13	Left	3	R-L	Egg-bar	0.4	1.7706	-228.499	208.622	3169.61	3184.67	0.0658195
528	585.13	Left	3	R-L	Egg-bar	0.45	1.8128	-140.651	193.757	3203.94	3212.87	0.0604746
528	585.13	Left	3	R-L	Egg-bar	0.5	1.855	-34.996	177.402	3394.98	3399.8	0.0522541
528	585.13	Left	3	R-L	Egg-bar	0.55	1.8972	60.725	136.754	3703.1	3706.13	0.0369296
528	585.13	Left	3	R-L	Egg-bar	0.6	1.9394	191.769	107.873	3966.66	3972.75	0.0271949
528	585.13	Left	3	R-L	Egg-bar	0.65	1.9816	347.481	88.288	4013.63	4029.61	0.0219971
528	585.13	Left	3	R-L	Egg-bar	0.7	2.0238	445.911	72.052	3746.37	3773.5	0.0192325
528	585.13	Left	3	R-L	Egg-bar	0.75	2.066	494.989	58.735	3203.4	3241.95	0.0183352
528	585.13	Left	3	R-L	Egg-bar	0.8	2.1082	441.783	64.822	2568.7	2607.22	0.0252353
528	585.13	Left	3	R-L	Egg-bar	0.85	2.1504	399.945	51.111	1970.63	2011.46	0.0259363
528	585.13	Left	3	R-L	Egg-bar	0.9	2.1926	238.217	13.545	1326.94	1348.22	0.0102077
528	585.13	Left	3	R-L	Egg-bar	0.95	2.2348	177.468	-22.411	853.297	871.845	0.026264
528	585.13	Left	3	R-L	Egg-bar	1	2.277	1.312	0.727	-2.096	2.57742	0.346851
528	585.13	Left	5	R-L	Egg-bar	0	1.065	-17.298	11.333	94.513	96.749	0.119909	3175.81	2465
528	585.13	Left	5	R-L	Egg-bar	0.05	1.10885	-223.708	44.608	687.852	724.69	0.0648512
528	585.13	Left	5	R-L	Egg-bar	0.1	1.1527	-182.401	110.267	1248.93	1266.99	0.0882891
528	585.13	Left	5	R-L	Egg-bar	0.15	1.19655	-274.613	179.138	2014.88	2041.38	0.0889074
528	585.13	Left	5	R-L	Egg-bar	0.2	1.2404	-305.297	237.189	2528.34	2557.73	0.0938121
528	585.13	Left	5	R-L	Egg-bar	0.25	1.28425	-320.129	261.233	2864.63	2894.28	0.0911926
528	585.13	Left	5	R-L	Egg-bar	0.3	1.3281	-281.845	280.361	3116.04	3141.3	0.0899734
528	585.13	Left	5	R-L	Egg-bar	0.35	1.37195	-213.786	283.42	3236.27	3255.69	0.087576
528	585.13	Left	5	R-L	Egg-bar	0.4	1.4158	-123.959	292.788	3298.46	3313.74	0.0887652
528	585.13	Left	5	R-L	Egg-bar	0.45	1.45965	-27.936	281.91	3358.26	3370.18	0.0839454
528	585.13	Left	5	R-L	Egg-bar	0.5	1.5035	68.087	256.474	3485.17	3495.26	0.0735901
528	585.13	Left	5	R-L	Egg-bar	0.55	1.54735	178.945	217.73	3714.47	3725.15	0.0586167
528	585.13	Left	5	R-L	Egg-bar	0.6	1.5912	308.113	185.906	3826.86	3843.75	0.0485792
528	585.13	Left	5	R-L	Egg-bar	0.65	1.63505	416.075	156.041	3655.85	3682.76	0.0426826
528	585.13	Left	5	R-L	Egg-bar	0.7	1.6789	475.07	124.529	3361.05	3396.74	0.0370506
528	585.13	Left	5	R-L	Egg-bar	0.75	1.72275	502.337	96.622	2941.03	2985.18	0.0328532
528	585.13	Left	5	R-L	Egg-bar	0.8	1.7666	460.093	79.031	2410.84	2455.62	0.0327815
528	585.13	Left	5	R-L	Egg-bar	0.85	1.81045	373.136	42.813	1775.77	1815.06	0.0241095
528	585.13	Left	5	R-L	Egg-bar	0.9	1.8543	204.509	31.743	1197.13	1214.88	0.026516
528	585.13	Left	5	R-L	Egg-bar	0.95	1.89815	135.229	-15.736	691.673	704.944	0.0227506
528	585.13	Left	5	R-L	Egg-bar	1	1.942	1.159	-2.595	2.846	4.02207	0.911806
528	585.13	Right	2	R-L	Egg-bar	0	0.915	-161.392	-27.453	432.668	462.604	0.0634505	3216.66	2560
528	585.13	Right	2	R-L	Egg-bar	0.05	0.9556	-205.599	-49.348	815.23	842.203	0.0605326
528	585.13	Right	2	R-L	Egg-bar	0.1	0.9962	-301.983	-24.146	1699.31	1726.1	0.0142093
528	585.13	Right	2	R-L	Egg-bar	0.15	1.0368	-441.467	-133.353	2292.66	2338.58	0.0581652
528	585.13	Right	2	R-L	Egg-bar	0.2	1.0774	-493.961	-165.363	2865.99	2912.94	0.0576984
528	585.13	Right	2	R-L	Egg-bar	0.25	1.118	-510.238	-197.097	3194.91	3241.4	0.0616909
528	585.13	Right	2	R-L	Egg-bar	0.3	1.1586	-457.756	-219.677	3313.7	3352.38	0.0662935
528	585.13	Right	2	R-L	Egg-bar	0.35	1.1992	-357.043	-235.497	3256.45	3284.42	0.0723171
528	585.13	Right	2	R-L	Egg-bar	0.4	1.2398	-251.329	-239.632	3220.77	3239.44	0.074402
528	585.13	Right	2	R-L	Egg-bar	0.45	1.2804	-138.808	-235.626	3283.69	3295.06	0.0717564
528	585.13	Right	2	R-L	Egg-bar	0.5	1.321	-52.599	-213.292	3538.63	3545.44	0.0602753
528	585.13	Right	2	R-L	Egg-bar	0.55	1.3616	63.635	-198.463	3927.92	3933.44	0.0505263
528	585.13	Right	2	R-L	Egg-bar	0.6	1.4022	202.414	-195.216	4109.3	4118.91	0.0475059
528	585.13	Right	2	R-L	Egg-bar	0.65	1.4428	314.626	-182.342	3902.89	3919.8	0.0467197
528	585.13	Right	2	R-L	Egg-bar	0.7	1.4834	380.979	-172.056	3404.2	3429.77	0.0505423
528	585.13	Right	2	R-L	Egg-bar	0.75	1.524	404.478	-162.239	2829.95	2863.31	0.0573293
528	585.13	Right	2	R-L	Egg-bar	0.8	1.5646	355.741	-149.521	2233.39	2266.48	0.0669481
528	585.13	Right	2	R-L	Egg-bar	0.85	1.6052	324.568	-108.939	1683.54	1718	0.0647082
528	585.13	Right	2	R-L	Egg-bar	0.9	1.6458	173.874	-82.965	1081.12	1098.15	0.07674
528	585.13	Right	2	R-L	Egg-bar	0.95	1.6864	136.65	12.602	587.604	603.416	0.0214464
528	585.13	Right	2	R-L	Egg-bar	1	1.727	1.234	0.124	2.926	3.17799	0.0423787
528	585.13	Right	3	L-R	Egg-bar	0	2.058	68.454	23.375	338.5	346.142	0.0690547	3228.14	2106
528	585.13	Right	3	L-R	Egg-bar	0.05	2.09835	245.79	78.776	882.38	919.355	0.0892767
528	585.13	Right	3	L-R	Egg-bar	0.1	2.1387	312.539	28.96	1795.76	1822.98	0.0161269
528	585.13	Right	3	L-R	Egg-bar	0.15	2.17905	443.512	143.668	2430.27	2474.58	0.0591161
528	585.13	Right	3	L-R	Egg-bar	0.2	2.2194	494.758	169.749	2965.8	3011.57	0.0572355
528	585.13	Right	3	L-R	Egg-bar	0.25	2.25975	477.428	198.99	3176.08	3217.92	0.0626528
528	585.13	Right	3	L-R	Egg-bar	0.3	2.3001	402.195	203.491	3232.49	3263.77	0.0629517
528	585.13	Right	3	L-R	Egg-bar	0.35	2.34045	303.488	198.349	3152.2	3172.98	0.0629239
528	585.13	Right	3	L-R	Egg-bar	0.4	2.3808	212.467	184.179	3093.45	3106.2	0.0595384
528	585.13	Right	3	L-R	Egg-bar	0.45	2.42115	126.358	163.103	3174.87	3181.56	0.0513732
528	585.13	Right	3	L-R	Egg-bar	0.5	2.4615	38.64	129.771	3449.16	3451.82	0.0376239
528	585.13	Right	3	L-R	Egg-bar	0.55	2.50185	-74.426	76.98	3887.08	3888.56	0.0198041
528	585.13	Right	3	L-R	Egg-bar	0.6	2.5422	-230.393	37.463	4182.06	4188.57	0.00895801
528	585.13	Right	3	L-R	Egg-bar	0.65	2.58255	-374.855	17.119	4096.95	4114.1	0.00417848
528	585.13	Right	3	L-R	Egg-bar	0.7	2.6229	-454.219	5.683	3601.04	3629.58	0.00157816
528	585.13	Right	3	L-R	Egg-bar	0.75	2.66325	-434.412	18.67	2845.58	2878.61	0.00656105
528	585.13	Right	3	L-R	Egg-bar	0.8	2.7036	-341.385	38.457	2107.36	2135.18	0.0182489
528	585.13	Right	3	L-R	Egg-bar	0.85	2.74395	-265.462	23.693	1446.96	1471.3	0.0163743
528	585.13	Right	3	L-R	Egg-bar	0.9	2.7843	-137.483	36.629	947.123	957.75	0.038674
528	585.13	Right	3	L-R	Egg-bar	0.95	2.82465	-64.832	-49.891	484.903	491.755	0.102889
528	585.13	Right	3	L-R	Egg-bar	1	2.865	4.23	1.314	0.642	4.47567	2.04673
528	585.13	Right	4	R-L	Egg-bar	0	0.657	-187.593	-25.198	443.221	481.945	0.056852	3344.95	2454
528	585.13	Right	4	R-L	Egg-bar	0.05	0.69655	-251.881	-55.609	977.837	1011.29	0.0568694
528	585.13	Right	4	R-L	Egg-bar	0.1	0.7361	-379.154	-77.94	1926.01	1964.52	0.0404671
528	585.13	Right	4	R-L	Egg-bar	0.15	0.77565	-458.605	-183.053	2501.28	2549.56	0.0731837
528	585.13	Right	4	R-L	Egg-bar	0.2	0.8152	-519.153	-223.36	3055.52	3107.35	0.0731005
528	585.13	Right	4	R-L	Egg-bar	0.25	0.85475	-525.95	-238.798	3383.2	3432.15	0.0705835
528	585.13	Right	4	R-L	Egg-bar	0.3	0.8943	-473.224	-232.259	3481.91	3521.59	0.0667044
528	585.13	Right	4	R-L	Egg-bar	0.35	0.93385	-363.721	-234.511	3340.67	3368.59	0.0701988
528	585.13	Right	4	R-L	Egg-bar	0.4	0.9734	-250.044	-227.198	3215.97	3233.67	0.0706468
528	585.13	Right	4	R-L	Egg-bar	0.45	1.01295	-133.795	-230.409	3216.98	3227.99	0.0716228
528	585.13	Right	4	R-L	Egg-bar	0.5	1.0525	-46.811	-208.18	3413.11	3419.77	0.0609942
528	585.13	Right	4	R-L	Egg-bar	0.55	1.09205	81.413	-181.629	3802.77	3807.98	0.0477623
528	585.13	Right	4	R-L	Egg-bar	0.6	1.1316	235.546	-166.233	4034.62	4044.91	0.0412016
528	585.13	Right	4	R-L	Egg-bar	0.65	1.17115	361.661	-141.889	3888.15	3907.51	0.0364927
528	585.13	Right	4	R-L	Egg-bar	0.7	1.2107	425.011	-126.664	3404.14	3432.91	0.0372088
528	585.13	Right	4	R-L	Egg-bar	0.75	1.25025	420.737	-122.315	2779.63	2813.95	0.0440041
528	585.13	Right	4	R-L	Egg-bar	0.8	1.2898	371.899	-118.069	2270.77	2304.05	0.0519951
528	585.13	Right	4	R-L	Egg-bar	0.85	1.32935	342.605	-84.084	1770.02	1804.83	0.0475046
528	585.13	Right	4	R-L	Egg-bar	0.9	1.3689	139.492	-43.409	1091.76	1101.49	0.0397607
528	585.13	Right	4	R-L	Egg-bar	0.95	1.40845	97.233	25.76	647.329	655.097	0.0397943
528	585.13	Right	4	R-L	Egg-bar	1	1.448	3.881	6.099	10.649	12.8709	0.57273
528	585.13	Right	5	R-L	Egg-bar	0	1.172	-44.519	-4.243	193.916	199.006	0.0218806	3272.4	2559
528	585.13	Right	5	R-L	Egg-bar	0.05	1.2149	-201.492	-84.035	821.937	850.436	0.10224
528	585.13	Right	5	R-L	Egg-bar	0.1	1.2578	-249.06	-8.431	1615.67	1634.77	0.00521828
528	585.13	Right	5	R-L	Egg-bar	0.15	1.3007	-432.286	-170.998	2351.58	2397.09	0.0727163
528	585.13	Right	5	R-L	Egg-bar	0.2	1.3436	-471.408	-199.921	2869.58	2914.9	0.0696692
528	585.13	Right	5	R-L	Egg-bar	0.25	1.3865	-468.779	-232.156	3145.21	3188.41	0.0738126
528	585.13	Right	5	R-L	Egg-bar	0.3	1.4294	-419.98	-240.881	3253.18	3289.01	0.0740448
528	585.13	Right	5	R-L	Egg-bar	0.35	1.4723	-329.316	-248.936	3245.16	3271.31	0.07671
528	585.13	Right	5	R-L	Egg-bar	0.4	1.5152	-223.532	-250.148	3282.82	3299.92	0.0761991
528	585.13	Right	5	R-L	Egg-bar	0.45	1.5581	-122.199	-241.93	3372.56	3383.44	0.0717348
528	585.13	Right	5	R-L	Egg-bar	0.5	1.601	-19.389	-213.121	3623.55	3629.86	0.0588155
528	585.13	Right	5	R-L	Egg-bar	0.55	1.6439	103.386	-202.13	3902.23	3908.83	0.0517986
528	585.13	Right	5	R-L	Egg-bar	0.6	1.6868	252.788	-194.166	3979.72	3992.46	0.0487889
528	585.13	Right	5	R-L	Egg-bar	0.65	1.7297	348.095	-173.772	3708.04	3728.39	0.0468636
528	585.13	Right	5	R-L	Egg-bar	0.7	1.7726	395.856	-157.673	3150.93	3179.61	0.0500402
528	585.13	Right	5	R-L	Egg-bar	0.75	1.8155	387.533	-146.853	2526.28	2560.04	0.0581302
528	585.13	Right	5	R-L	Egg-bar	0.8	1.8584	313.526	-126.669	1953.95	1983	0.064827
528	585.13	Right	5	R-L	Egg-bar	0.85	1.9013	218.115	-78.371	1310.31	1330.65	0.0598112
528	585.13	Right	5	R-L	Egg-bar	0.9	1.9442	112.854	-76.696	877.635	888.179	0.0873894
528	585.13	Right	5	R-L	Egg-bar	0.95	1.9871	51.741	18.248	478.883	482.016	0.0381053
528	585.13	Right	5	R-L	Egg-bar	1	2.03	0.752	1.614	2.831	3.34441	0.570117
576A	555.65	Left	1	L-R	Egg-bar	0	0.544	-25.018	84.238	185.851	205.579	0.453256	3492.94	2408
576A	555.65	Left	1	L-R	Egg-bar	0.05	0.5808	-136.428	30.398	539.401	557.216	0.0563551
576A	555.65	Left	1	L-R	Egg-bar	0.1	0.6176	-219.431	67.484	1076.56	1100.77	0.0626846
576A	555.65	Left	1	L-R	Egg-bar	0.15	0.6544	-329.58	67.878	1780.16	1811.69	0.0381302
576A	555.65	Left	1	L-R	Egg-bar	0.2	0.6912	-391.232	122.635	2292.08	2328.46	0.0535038
576A	555.65	Left	1	L-R	Egg-bar	0.25	0.728	-410.812	118.489	2752.69	2785.7	0.0430448
576A	555.65	Left	1	L-R	Egg-bar	0.3	0.7648	-400.875	127.861	3067.42	3096.15	0.0416836
576A	555.65	Left	1	L-R	Egg-bar	0.35	0.8016	-327.551	146.04	3165.29	3185.54	0.0461379
576A	555.65	Left	1	L-R	Egg-bar	0.4	0.8384	-236.171	169.556	3134.16	3147.62	0.0540993
576A	555.65	Left	1	L-R	Egg-bar	0.45	0.8752	-139.131	160.68	3260.39	3267.31	0.0492824
576A	555.65	Left	1	L-R	Egg-bar	0.5	0.912	-44.512	134.667	3430.28	3433.21	0.0392584
576A	555.65	Left	1	L-R	Egg-bar	0.55	0.9488	62.331	115.149	3518.62	3521.05	0.0327257
576A	555.65	Left	1	L-R	Egg-bar	0.6	0.9856	188.358	90.094	3407.18	3413.58	0.0264424
576A	555.65	Left	1	L-R	Egg-bar	0.65	1.0224	281.88	72.242	3128.21	3141.71	0.0230937
576A	555.65	Left	1	L-R	Egg-bar	0.7	1.0592	339.846	65.592	2761.66	2783.27	0.0237509
576A	555.65	Left	1	L-R	Egg-bar	0.75	1.096	353.29	64.231	2296.5	2324.4	0.0279691
576A	555.65	Left	1	L-R	Egg-bar	0.8	1.1328	329.042	64.567	1902.01	1931.34	0.0339467
576A	555.65	Left	1	L-R	Egg-bar	0.85	1.1696	288.922	61.785	1533.06	1561.27	0.0403018
576A	555.65	Left	1	L-R	Egg-bar	0.9	1.2064	174.583	12.624	1038.59	1053.23	0.012155
576A	555.65	Left	1	L-R	Egg-bar	0.95	1.2432	225.384	-10.287	680.505	716.932	0.0151167
576A	555.65	Left	1	L-R	Egg-bar	1	1.28	0.663	0.669	2.377	2.55681	0.281447
576A	555.65	Left	3	R-L	Egg-bar	0	2.157	-17.01	45.235	115.728	125.413	0.390873	3266.73	2407
576A	555.65	Left	3	R-L	Egg-bar	0.05	2.19815	186.416	-30.219	594.485	623.76	0.0508322
576A	555.65	Left	3	R-L	Egg-bar	0.1	2.2393	309.592	-38.11	1282.82	1320.2	0.0297079
576A	555.65	Left	3	R-L	Egg-bar	0.15	2.28045	466.27	-73.381	2101.91	2154.25	0.0349116
576A	555.65	Left	3	R-L	Egg-bar	0.2	2.3216	491.614	-131.786	2500.93	2552.19	0.0526949
576A	555.65	Left	3	R-L	Egg-bar	0.25	2.36275	491.01	-141.81	2873.88	2918.97	0.0493444
576A	555.65	Left	3	R-L	Egg-bar	0.3	2.4039	443.087	-123.864	3097.42	3131.41	0.0399894
576A	555.65	Left	3	R-L	Egg-bar	0.35	2.44505	357.786	-140.788	3081.83	3105.72	0.0456833
576A	555.65	Left	3	R-L	Egg-bar	0.4	2.4862	269.478	-138.094	3071.45	3086.33	0.0449606
576A	555.65	Left	3	R-L	Egg-bar	0.45	2.52735	184.457	-114.27	3145.12	3152.59	0.0363325
576A	555.65	Left	3	R-L	Egg-bar	0.5	2.5685	81.944	-97.475	3224.66	3227.17	0.030228
576A	555.65	Left	3	R-L	Egg-bar	0.55	2.60965	-26.425	-83.926	3179.62	3180.84	0.026395
576A	555.65	Left	3	R-L	Egg-bar	0.6	2.6508	-132.291	-71.787	2942.94	2946.78	0.024393
576A	555.65	Left	3	R-L	Egg-bar	0.65	2.69195	-198.895	-64.458	2644.53	2652.79	0.024374
576A	555.65	Left	3	R-L	Egg-bar	0.7	2.7331	-242.827	-61.376	2367.08	2380.29	0.025929
576A	555.65	Left	3	R-L	Egg-bar	0.75	2.77425	-284.519	-68.46	2176.96	2196.54	0.0314475
576A	555.65	Left	3	R-L	Egg-bar	0.8	2.8154	-327.069	-76.789	2009.79	2037.67	0.0382075
576A	555.65	Left	3	R-L	Egg-bar	0.85	2.85655	-325.687	-72.27	1726.92	1758.85	0.041849
576A	555.65	Left	3	R-L	Egg-bar	0.9	2.8977	-241.212	-37.151	1251.45	1275.03	0.0296863
576A	555.65	Left	3	R-L	Egg-bar	0.95	2.93885	-207.969	-10.251	844.282	869.579	0.0121417
576A	555.65	Left	3	R-L	Egg-bar	1	2.98	1.893	-1.18	-1.273	2.56834	0.926944
576A	555.65	Left	5	L-R	Egg-bar	0	2.5	-18.326	16.924	71.258	75.4981	0.237503	3979	2624
576A	555.65	Left	5	L-R	Egg-bar	0.05	2.54375	140.293	-12.626	526.388	544.909	0.0239861
576A	555.65	Left	5	L-R	Egg-bar	0.1	2.5875	245.024	-35.321	1230.12	1254.78	0.0287135
576A	555.65	Left	5	L-R	Egg-bar	0.15	2.63125	403.079	-117.088	1918.49	1963.88	0.0610312
576A	555.65	Left	5	L-R	Egg-bar	0.2	2.675	430.671	-153.07	2364.82	2408.58	0.0647281
576A	555.65	Left	5	L-R	Egg-bar	0.25	2.71875	426.322	-167.381	2650.92	2690.2	0.0631407
576A	555.65	Left	5	L-R	Egg-bar	0.3	2.7625	394.361	-173.319	2857.83	2890.11	0.0606471
576A	555.65	Left	5	L-R	Egg-bar	0.35	2.80625	324.991	-202.053	2958.66	2983.3	0.0682921
576A	555.65	Left	5	L-R	Egg-bar	0.4	2.85	226.97	-211.566	3002.63	3018.62	0.0704602
576A	555.65	Left	5	L-R	Egg-bar	0.45	2.89375	146.758	-186.459	3072.47	3081.62	0.060687
576A	555.65	Left	5	L-R	Egg-bar	0.5	2.9375	49.87	-154.9	3162.77	3166.95	0.0489761
576A	555.65	Left	5	L-R	Egg-bar	0.55	2.98125	-60.162	-131.188	3119.86	3123.19	0.0420494
576A	555.65	Left	5	L-R	Egg-bar	0.6	3.025	-156.426	-105.148	2912.97	2919.06	0.0360965
576A	555.65	Left	5	L-R	Egg-bar	0.65	3.06875	-219.304	-89.567	2639.77	2650.38	0.0339299
576A	555.65	Left	5	L-R	Egg-bar	0.7	3.1125	-266.586	-81.384	2338.66	2355.21	0.0347995
576A	555.65	Left	5	L-R	Egg-bar	0.75	3.15625	-301.828	-83.35	2111.64	2134.73	0.0394718
576A	555.65	Left	5	L-R	Egg-bar	0.8	3.2	-330.715	-80.607	1915.23	1945.24	0.0420874
576A	555.65	Left	5	L-R	Egg-bar	0.85	3.24375	-303.53	-55.897	1609.36	1638.69	0.0347324
576A	555.65	Left	5	L-R	Egg-bar	0.9	3.2875	-194.851	-36.596	1096.41	1114.19	0.033378
576A	555.65	Left	5	L-R	Egg-bar	0.95	3.33125	-175.527	-8.046	716.969	738.186	0.0112222
576A	555.65	Left	5	L-R	Egg-bar	1	3.375	-1.119	-2.278	-0.933	2.70406	2.44159
576A	555.65	Left	6	L-R	Egg-bar	0	2.54	2.724	-23.022	149.437	151.225	0.154058	3899.67	2780
576A	555.65	Left	6	L-R	Egg-bar	0.05	2.586	173.121	-14.698	605.224	629.669	0.0242852
576A	555.65	Left	6	L-R	Egg-bar	0.1	2.632	287.379	-32.947	1292.75	1324.72	0.025486
576A	555.65	Left	6	L-R	Egg-bar	0.15	2.678	414.327	-84.96	1912.6	1958.8	0.0444213
576A	555.65	Left	6	L-R	Egg-bar	0.2	2.724	441.242	-114.662	2331.26	2375.42	0.0491845
576A	555.65	Left	6	L-R	Egg-bar	0.25	2.77	417.264	-113.37	2655.97	2690.93	0.0426851
576A	555.65	Left	6	L-R	Egg-bar	0.3	2.816	375.234	-109.937	2816.16	2843.17	0.039038
576A	555.65	Left	6	L-R	Egg-bar	0.35	2.862	303.933	-142.878	2872.7	2892.27	0.0497364
576A	555.65	Left	6	L-R	Egg-bar	0.4	2.908	207.904	-160.352	2911.78	2923.6	0.05507
576A	555.65	Left	6	L-R	Egg-bar	0.45	2.954	117.663	-143.132	3026.11	3031.78	0.047299
576A	555.65	Left	6	L-R	Egg-bar	0.5	3	10.919	-113.793	3222.26	3224.29	0.0353146
576A	555.65	Left	6	L-R	Egg-bar	0.55	3.046	-100.22	-93.536	3252.15	3255.04	0.0287613
576A	555.65	Left	6	L-R	Egg-bar	0.6	3.092	-195.885	-75.514	3064.02	3071.21	0.0246454
576A	555.65	Left	6	L-R	Egg-bar	0.65	3.138	-261.363	-61.832	2739.49	2752.62	0.0225706
576A	555.65	Left	6	L-R	Egg-bar	0.7	3.184	-300.973	-57.467	2418.1	2437.44	0.0237654
576A	555.65	Left	6	L-R	Egg-bar	0.75	3.23	-347.64	-63.408	2202.57	2230.73	0.0287882
576A	555.65	Left	6	L-R	Egg-bar	0.8	3.276	-402.345	-65.547	2086.78	2126.22	0.0314107
576A	555.65	Left	6	L-R	Egg-bar	0.85	3.322	-373.167	-43.743	1738.35	1778.49	0.0251636
576A	555.65	Left	6	L-R	Egg-bar	0.9	3.368	-225.881	-14.065	1171.72	1193.38	0.0120037
576A	555.65	Left	6	L-R	Egg-bar	0.95	3.414	-199.657	-2.261	727.989	754.875	0.00310582
576A	555.65	Left	6	L-R	Egg-bar	1	3.46	-3.219	-0.74	1.901	3.81095	0.389269
576A	555.65	Right	1	L-R	Egg-bar	0	3.739	-15.992	11.648	42.905	47.2468	0.271484	4050.77	2805
576A	555.65	Right	1	L-R	Egg-bar	0.05	3.78605	124.781	10.92	493.087	508.748	0.0221462
576A	555.65	Right	1	L-R	Egg-bar	0.1	3.8331	232.768	20.179	1136.13	1159.9	0.0177612
576A	555.65	Right	1	L-R	Egg-bar	0.15	3.88015	395.091	64.167	1808.79	1852.55	0.0354751
576A	555.65	Right	1	L-R	Egg-bar	0.2	3.9272	460.793	72.466	2341.24	2387.26	0.0309519
576A	555.65	Right	1	L-R	Egg-bar	0.25	3.97425	474.133	88.338	2599.68	2644.04	0.0339803
576A	555.65	Right	1	L-R	Egg-bar	0.3	4.0213	425.996	121.625	2768.47	2803.69	0.0439322
576A	555.65	Right	1	L-R	Egg-bar	0.35	4.06835	349.973	145.409	2955.9	2980.09	0.0491928
576A	555.65	Right	1	L-R	Egg-bar	0.4	4.1154	253.403	141.796	3112.67	3126.19	0.0455544
576A	555.65	Right	1	L-R	Egg-bar	0.45	4.16245	178.673	120.31	3189.05	3196.32	0.0377259
576A	555.65	Right	1	L-R	Egg-bar	0.5	4.2095	87.616	96.303	3227.06	3229.68	0.0298424
576A	555.65	Right	1	L-R	Egg-bar	0.55	4.25655	-27.332	60.351	3181.17	3181.86	0.0189713
576A	555.65	Right	1	L-R	Egg-bar	0.6	4.3036	-115.446	25.727	3012.93	3015.25	0.00853887
576A	555.65	Right	1	L-R	Egg-bar	0.65	4.35065	-188.515	4.865	2757.86	2764.3	0.00176405
576A	555.65	Right	1	L-R	Egg-bar	0.7	4.3977	-237.363	-3.647	2530.74	2541.85	0.00144108
576A	555.65	Right	1	L-R	Egg-bar	0.75	4.44475	-284.139	-6.832	2363.29	2380.32	0.00289089
576A	555.65	Right	1	L-R	Egg-bar	0.8	4.4918	-341.976	-9.834	2272.54	2298.15	0.00432732
576A	555.65	Right	1	L-R	Egg-bar	0.85	4.53885	-365.728	-16.872	2082.78	2114.72	0.00810069
576A	555.65	Right	1	L-R	Egg-bar	0.9	4.5859	-313.274	-15.558	1588.68	1619.35	0.00979302
576A	555.65	Right	1	L-R	Egg-bar	0.95	4.63295	-257.763	-33.263	1021.85	1054.38	0.0325518
576A	555.65	Right	1	L-R	Egg-bar	1	4.68	-3.412	-0.262	3.23	4.70567	0.0811146
576A	555.65	Right	2	R-L	Egg-bar	0	2.555	42.019	5.688	200.692	205.122	0.0283419	3856.09	2805
576A	555.65	Right	2	R-L	Egg-bar	0.05	2.59905	-119.083	5.844	495.463	509.606	0.011795
576A	555.65	Right	2	R-L	Egg-bar	0.1	2.6431	-189.206	-32.347	1069.43	1086.52	0.0302468
576A	555.65	Right	2	R-L	Egg-bar	0.15	2.68715	-284.387	-95.134	1575.65	1603.93	0.0603775
576A	555.65	Right	2	R-L	Egg-bar	0.2	2.7312	-295.116	-127.649	1921.11	1947.84	0.0664453
576A	555.65	Right	2	R-L	Egg-bar	0.25	2.77525	-283.157	-150.289	2172.18	2195.71	0.0691879
576A	555.65	Right	2	R-L	Egg-bar	0.3	2.8193	-271.434	-166.775	2388.74	2409.89	0.069817
576A	555.65	Right	2	R-L	Egg-bar	0.35	2.86335	-233.797	-178.859	2643.09	2659.43	0.0676704
576A	555.65	Right	2	R-L	Egg-bar	0.4	2.9074	-170.474	-193.154	2863.66	2875.23	0.06745
576A	555.65	Right	2	R-L	Egg-bar	0.45	2.95145	-87.407	-206.709	2977.58	2986.02	0.0694219
576A	555.65	Right	2	R-L	Egg-bar	0.5	2.9955	0.534	-189.339	3145.95	3151.64	0.060185
576A	555.65	Right	2	R-L	Egg-bar	0.55	3.03955	89.861	-175.986	3235.32	3241.34	0.0543953
576A	555.65	Right	2	R-L	Egg-bar	0.6	3.0836	194.017	-153.248	3202.29	3211.82	0.0478558
576A	555.65	Right	2	R-L	Egg-bar	0.65	3.12765	287.316	-132.407	3006.62	3023.22	0.0440385
576A	555.65	Right	2	R-L	Egg-bar	0.7	3.1717	347.818	-108.26	2722.64	2746.9	0.0397629
576A	555.65	Right	2	R-L	Egg-bar	0.75	3.21575	377.205	-93.799	2401.57	2432.82	0.0390574
576A	555.65	Right	2	R-L	Egg-bar	0.8	3.2598	385.139	-87.857	2115.05	2151.63	0.0415389
576A	555.65	Right	2	R-L	Egg-bar	0.85	3.30385	317.345	-63.779	1650.91	1682.34	0.0386327
576A	555.65	Right	2	R-L	Egg-bar	0.9	3.3479	187.032	-33.559	1120.85	1136.84	0.0299406
576A	555.65	Right	2	R-L	Egg-bar	0.95	3.39195	188.665	-8.407	761.565	784.631	0.0110391
576A	555.65	Right	2	R-L	Egg-bar	1	3.436	3.732	-1.082	-2.824	4.80349	0.383144
576A	555.65	Right	3	R-L	Egg-bar	0	0.998	-67.781	-48.053	253.473	266.743	0.189578	4045.23	3055
576A	555.65	Right	3	R-L	Egg-bar	0.05	1.0367	-204.551	-5.69	728.282	756.484	0.00781291
576A	555.65	Right	3	R-L	Egg-bar	0.1	1.0754	-282.694	12.324	1506.88	1533.22	0.00817848
576A	555.65	Right	3	R-L	Egg-bar	0.15	1.1141	-341.846	-35.315	1957.35	1987.29	0.0180422
576A	555.65	Right	3	R-L	Egg-bar	0.2	1.1528	-386.908	-76.794	2473.36	2504.61	0.0310485
576A	555.65	Right	3	R-L	Egg-bar	0.25	1.1915	-392.22	-121.862	2772.72	2802.97	0.0439503
576A	555.65	Right	3	R-L	Egg-bar	0.3	1.2302	-343.406	-132.781	2890.79	2914.14	0.0459324
576A	555.65	Right	3	R-L	Egg-bar	0.35	1.2689	-287.612	-156.32	2891.84	2910.3	0.0540556
576A	555.65	Right	3	R-L	Egg-bar	0.4	1.3076	-211.287	-173.12	2906.57	2919.37	0.0595617
576A	555.65	Right	3	R-L	Egg-bar	0.45	1.3463	-124.778	-168.529	2930.51	2938	0.0575084
576A	555.65	Right	3	R-L	Egg-bar	0.5	1.385	-38.288	-144.975	3056.39	3060.07	0.0474334
576A	555.65	Right	3	R-L	Egg-bar	0.55	1.4237	56.052	-125.655	3196.04	3199	0.0393159
576A	555.65	Right	3	R-L	Egg-bar	0.6	1.4624	171.518	-106.388	3244.2	3250.47	0.0327933
576A	555.65	Right	3	R-L	Egg-bar	0.65	1.5011	281.952	-104.632	3098.3	3112.86	0.0337708
576A	555.65	Right	3	R-L	Egg-bar	0.7	1.5398	344.166	-104.522	2849.97	2872.58	0.0366747
576A	555.65	Right	3	R-L	Egg-bar	0.75	1.5785	378.874	-106.296	2474.87	2505.96	0.0429501
576A	555.65	Right	3	R-L	Egg-bar	0.8	1.6172	362.949	-116.388	2053.94	2089.01	0.0566657
576A	555.65	Right	3	R-L	Egg-bar	0.85	1.6559	301.11	-106.792	1595.53	1627.2	0.066932
576A	555.65	Right	3	R-L	Egg-bar	0.9	1.6946	206.227	-56.055	1149.26	1168.96	0.0487747
576A	555.65	Right	3	R-L	Egg-bar	0.95	1.7333	213.454	-31.107	778.655	807.981	0.0399497
576A	555.65	Right	3	R-L	Egg-bar	1	1.772	-0.266	-1.589	-2.271	2.78444	0.699692
576A	555.65	Right	5	R-L	Egg-bar	0	2.073	-12.764	16.625	124.357	126.111	0.133688	4185.03	2890
576A	555.65	Right	5	R-L	Egg-bar	0.05	2.11785	-135.899	84.506	495.841	521.026	0.17043
576A	555.65	Right	5	R-L	Egg-bar	0.1	2.1627	-189.459	73.264	1224.41	1241.14	0.0598362
576A	555.65	Right	5	R-L	Egg-bar	0.15	2.20755	-382.545	116.046	2001.86	2041.39	0.0579691
576A	555.65	Right	5	R-L	Egg-bar	0.2	2.2524	-442.623	177.34	2613.19	2656.34	0.0678633
576A	555.65	Right	5	R-L	Egg-bar	0.25	2.29725	-466.286	196.23	3019.3	3061.39	0.0649919
576A	555.65	Right	5	R-L	Egg-bar	0.3	2.3421	-423.395	199.209	3262.8	3296.18	0.0610546
576A	555.65	Right	5	R-L	Egg-bar	0.35	2.38695	-338.87	202.823	3321.73	3345.12	0.0610595
576A	555.65	Right	5	R-L	Egg-bar	0.4	2.4318	-233.553	199.655	3286.34	3300.67	0.060753
576A	555.65	Right	5	R-L	Egg-bar	0.45	2.47665	-117.642	191.743	3264.82	3272.56	0.0587301
576A	555.65	Right	5	R-L	Egg-bar	0.5	2.5215	-22.202	169.897	3374.08	3378.43	0.0503536
576A	555.65	Right	5	R-L	Egg-bar	0.55	2.56635	86.059	142.998	3595.85	3599.72	0.0397675
576A	555.65	Right	5	R-L	Egg-bar	0.6	2.6112	213.056	124.714	3703.13	3711.35	0.033678
576A	555.65	Right	5	R-L	Egg-bar	0.65	2.65605	319.29	102.164	3528.23	3544.12	0.0289562
576A	555.65	Right	5	R-L	Egg-bar	0.7	2.7009	395.473	87.731	3168.06	3193.85	0.0276923
576A	555.65	Right	5	R-L	Egg-bar	0.75	2.74575	424.704	87.594	2736.87	2771.01	0.0320052
576A	555.65	Right	5	R-L	Egg-bar	0.8	2.7906	393.875	83.281	2203.2	2239.68	0.0378
576A	555.65	Right	5	R-L	Egg-bar	0.85	2.83545	276.351	56.78	1514.84	1540.88	0.0374826
576A	555.65	Right	5	R-L	Egg-bar	0.9	2.8803	166.786	56.711	980.537	996.236	0.0578367
576A	555.65	Right	5	R-L	Egg-bar	0.95	2.92515	94.186	-38.353	468.001	478.923	0.0819507
576A	555.65	Right	5	R-L	Egg-bar	1	2.97	3.278	-0.04	3.317	4.66362	0.0120591
674	530.7	Left	2	R-L	Egg-bar	0	0.118	-32.788	-4.153	315.379	317.106	0.0131683	3871	2940
674	530.7	Left	2	R-L	Egg-bar	0.05	0.15305	51.119	-116.621	716.553	727.779	0.162753
674	530.7	Left	2	R-L	Egg-bar	0.1	0.1881	68.54	-188.086	1214.38	1230.77	0.154882
674	530.7	Left	2	R-L	Egg-bar	0.15	0.22315	84.81	-192.416	1490.21	1504.98	0.12912
674	530.7	Left	2	R-L	Egg-bar	0.2	0.2582	81.143	-176.935	1602.29	1614.07	0.110427
674	530.7	Left	2	R-L	Egg-bar	0.25	0.29325	97.276	-156.597	1669.12	1679.27	0.0938201
674	530.7	Left	2	R-L	Egg-bar	0.3	0.3283	98.183	-108.869	1679.91	1686.29	0.0648066
674	530.7	Left	2	R-L	Egg-bar	0.35	0.36335	100.41	-40.07	1668.47	1671.97	0.024016
674	530.7	Left	2	R-L	Egg-bar	0.4	0.3984	98.801	36.327	1690.51	1693.78	0.0214888
674	530.7	Left	2	R-L	Egg-bar	0.45	0.43345	86.011	102.64	1792.15	1797.15	0.057272
674	530.7	Left	2	R-L	Egg-bar	0.5	0.4685	53.42	164.509	2032.27	2039.62	0.0809484
674	530.7	Left	2	R-L	Egg-bar	0.55	0.50355	12.446	248.086	2321.11	2334.37	0.106882
674	530.7	Left	2	R-L	Egg-bar	0.6	0.5386	-25.42	353.865	2502.64	2527.66	0.141397
674	530.7	Left	2	R-L	Egg-bar	0.65	0.57365	-52.337	455.265	2513.81	2555.24	0.181106
674	530.7	Left	2	R-L	Egg-bar	0.7	0.6087	-63.694	533.459	2335.29	2396.29	0.228434
674	530.7	Left	2	R-L	Egg-bar	0.75	0.64375	-59.129	560.324	1967.7	2046.78	0.284761
674	530.7	Left	2	R-L	Egg-bar	0.8	0.6788	-43.209	523.242	1486.85	1576.82	0.351914
674	530.7	Left	2	R-L	Egg-bar	0.85	0.71385	-34.787	469.487	1096.91	1193.67	0.428009
674	530.7	Left	2	R-L	Egg-bar	0.9	0.7489	-20.938	446.189	780.37	899.166	0.571766
674	530.7	Left	2	R-L	Egg-bar	0.95	0.78395	-53.07	385.523	442.966	589.63	0.870322
674	530.7	Left	2	R-L	Egg-bar	1	0.819	-78.217	306.856	33.186	318.402	9.24655
674	530.7	Left	3	R-L	Egg-bar	0	1.606	-9.323	-24.189	52.813	58.8323	0.458012	4034.01	2985
674	530.7	Left	3	R-L	Egg-bar	0.05	1.64905	-96.697	-113.294	412.334	438.412	0.274763
674	530.7	Left	3	R-L	Egg-bar	0.1	1.6921	-37.851	-121.803	956.688	965.153	0.127317
674	530.7	Left	3	R-L	Egg-bar	0.15	1.73515	8.457	-255.363	1587.98	1608.41	0.16081
674	530.7	Left	3	R-L	Egg-bar	0.2	1.7782	28.663	-293.051	2036.56	2057.73	0.143895
674	530.7	Left	3	R-L	Egg-bar	0.25	1.82125	32.741	-296.217	2286.8	2306.14	0.129534
674	530.7	Left	3	R-L	Egg-bar	0.3	1.8643	44.622	-262.179	2322.44	2337.62	0.112889
674	530.7	Left	3	R-L	Egg-bar	0.35	1.90735	70.84	-216.204	2393.98	2404.77	0.0903114
674	530.7	Left	3	R-L	Egg-bar	0.4	1.9504	88.447	-138.385	2480.11	2485.54	0.055798
674	530.7	Left	3	R-L	Egg-bar	0.45	1.99345	88.015	-67.559	2603.17	2605.53	0.0259526
674	530.7	Left	3	R-L	Egg-bar	0.5	2.0365	65.279	8.873	2802.83	2803.61	0.00316573
674	530.7	Left	3	R-L	Egg-bar	0.55	2.07955	31.373	93.844	3049.31	3050.91	0.0307755
674	530.7	Left	3	R-L	Egg-bar	0.6	2.1226	-6.056	215.498	3206.78	3214.02	0.0672007
674	530.7	Left	3	R-L	Egg-bar	0.65	2.16565	-23.98	329.349	3122.27	3139.68	0.105484
674	530.7	Left	3	R-L	Egg-bar	0.7	2.2087	-21.679	387.288	2830.97	2857.42	0.136804
674	530.7	Left	3	R-L	Egg-bar	0.75	2.25175	-8.916	392.287	2416.9	2448.54	0.16231
674	530.7	Left	3	R-L	Egg-bar	0.8	2.2948	-3.507	369.686	2055.6	2088.58	0.179843
674	530.7	Left	3	R-L	Egg-bar	0.85	2.33785	-17.185	289.604	1556.62	1583.42	0.186047
674	530.7	Left	3	R-L	Egg-bar	0.9	2.3809	-49.293	213.091	1128.52	1149.52	0.188823
674	530.7	Left	3	R-L	Egg-bar	0.95	2.42395	-56.038	154.058	695.929	714.976	0.22137
674	530.7	Left	3	R-L	Egg-bar	1	2.467	0.468	3.362	3.161	4.63832	1.06359
674	530.7	Left	4	L-R	Egg-bar	0	1.306	20.28	11.258	38.173	44.6676	0.29492	3202.32	2589
674	530.7	Left	4	L-R	Egg-bar	0.05	1.3508	39.798	110.777	520.685	533.824	0.212752
674	530.7	Left	4	L-R	Egg-bar	0.1	1.3956	30.536	207.008	1263.16	1280.38	0.163881
674	530.7	Left	4	L-R	Egg-bar	0.15	1.4404	-1.252	294.304	1819.79	1843.43	0.161724
674	530.7	Left	4	L-R	Egg-bar	0.2	1.4852	-2.578	325.09	2169.45	2193.67	0.149849
674	530.7	Left	4	L-R	Egg-bar	0.25	1.53	-3.111	354.854	2386.16	2412.41	0.148713
674	530.7	Left	4	L-R	Egg-bar	0.3	1.5748	-27.373	333.655	2551.38	2573.25	0.130774
674	530.7	Left	4	L-R	Egg-bar	0.35	1.6196	-70.71	254.225	2676.36	2689.33	0.0949892
674	530.7	Left	4	L-R	Egg-bar	0.4	1.6644	-86.923	171.545	2745.18	2751.91	0.0624895
674	530.7	Left	4	L-R	Egg-bar	0.45	1.7092	-79.464	94.705	2739.9	2742.68	0.0345652
674	530.7	Left	4	L-R	Egg-bar	0.5	1.754	-50.511	33.502	2779.89	2780.55	0.0120516
674	530.7	Left	4	L-R	Egg-bar	0.55	1.7988	-17.076	-51.88	2931.48	2931.99	0.0176975
674	530.7	Left	4	L-R	Egg-bar	0.6	1.8436	3.004	-163.971	3028.89	3033.33	0.0541356
674	530.7	Left	4	L-R	Egg-bar	0.65	1.8884	10.706	-263.994	2960.4	2972.17	0.0891751
674	530.7	Left	4	L-R	Egg-bar	0.7	1.9332	2.178	-332.967	2758.73	2778.76	0.120696
674	530.7	Left	4	L-R	Egg-bar	0.75	1.978	-12.926	-352.273	2438.23	2463.58	0.144479
674	530.7	Left	4	L-R	Egg-bar	0.8	2.0228	-25.339	-308.413	2008.73	2032.42	0.153537
674	530.7	Left	4	L-R	Egg-bar	0.85	2.0676	-3.277	-238.234	1579.02	1596.89	0.150875
674	530.7	Left	4	L-R	Egg-bar	0.9	2.1124	40.564	-200.794	1226.64	1243.63	0.163695
674	530.7	Left	4	L-R	Egg-bar	0.95	2.1572	52.509	-155.009	755.568	773.09	0.205156
674	530.7	Left	4	L-R	Egg-bar	1	2.202	2.446	-6.895	5.663	9.25168	1.21755
674	530.7	Left	5	R-L	Egg-bar	0	1.165	-20.406	-26.102	64.029	72.0932	0.407659	3401.02	2707
674	530.7	Left	5	R-L	Egg-bar	0.05	1.20945	-61.631	-101.234	446.505	461.967	0.226725
674	530.7	Left	5	R-L	Egg-bar	0.1	1.2539	-11.515	-194.763	1120.61	1137.47	0.173801
674	530.7	Left	5	R-L	Egg-bar	0.15	1.29835	59.077	-326.482	1798.73	1829.08	0.181507
674	530.7	Left	5	R-L	Egg-bar	0.2	1.3428	81.717	-354.453	2247.52	2276.76	0.157709
674	530.7	Left	5	R-L	Egg-bar	0.25	1.38725	79.407	-348.298	2373.48	2400.22	0.146745
674	530.7	Left	5	R-L	Egg-bar	0.3	1.4317	91.124	-312.07	2428.11	2449.78	0.128524
674	530.7	Left	5	R-L	Egg-bar	0.35	1.47615	109.496	-247.561	2474.84	2489.6	0.100031
674	530.7	Left	5	R-L	Egg-bar	0.4	1.5206	115.033	-168.469	2531.87	2540.08	0.0665393
674	530.7	Left	5	R-L	Egg-bar	0.45	1.56505	97.526	-92.237	2630.64	2634.06	0.0350626
674	530.7	Left	5	R-L	Egg-bar	0.5	1.6095	64.585	-30.017	2803.89	2804.79	0.0107055
674	530.7	Left	5	R-L	Egg-bar	0.55	1.65395	23.586	65.462	3043.67	3044.46	0.0215076
674	530.7	Left	5	R-L	Egg-bar	0.6	1.6984	-4.666	187.963	3146.21	3151.82	0.0597427
674	530.7	Left	5	R-L	Egg-bar	0.65	1.74285	-15.687	288.395	2992.96	3006.86	0.0963579
674	530.7	Left	5	R-L	Egg-bar	0.7	1.7873	-14.071	342.311	2656.18	2678.18	0.128873
674	530.7	Left	5	R-L	Egg-bar	0.75	1.83175	-7.805	344.587	2278.89	2304.8	0.151209
674	530.7	Left	5	R-L	Egg-bar	0.8	1.8762	-2.499	338.774	1971.37	2000.27	0.171847
674	530.7	Left	5	R-L	Egg-bar	0.85	1.92065	-26.813	268.566	1540.61	1564.07	0.174325
674	530.7	Left	5	R-L	Egg-bar	0.9	1.9651	-75.751	206.859	1214.32	1234.14	0.17035
674	530.7	Left	5	R-L	Egg-bar	0.95	2.00955	-79.327	158.873	808.935	828.196	0.196398
674	530.7	Left	5	R-L	Egg-bar	1	2.054	-8.741	8.97	10.899	16.6028	0.823011
674	530.7	Right	1	R-L	Egg-bar	0	1.938	14.001	-27.122	60.603	67.8554	0.447536	3149	2635
674	530.7	Right	1	R-L	Egg-bar	0.05	1.9797	116.95	-190.356	597.302	637.717	0.318693
674	530.7	Right	1	R-L	Egg-bar	0.1	2.0214	-37.792	-291.297	1452.91	1482.3	0.200493
674	530.7	Right	1	R-L	Egg-bar	0.15	2.0631	-94.209	-372.625	2088.76	2123.83	0.178395
674	530.7	Right	1	R-L	Egg-bar	0.2	2.1048	-123.05	-385.104	2358.7	2393.1	0.163269
674	530.7	Right	1	R-L	Egg-bar	0.25	2.1465	-153.103	-376.309	2491.67	2524.57	0.151027
674	530.7	Right	1	R-L	Egg-bar	0.3	2.1882	-164.722	-338.853	2576.39	2603.79	0.131523
674	530.7	Right	1	R-L	Egg-bar	0.35	2.2299	-170.154	-258.356	2639.59	2657.65	0.0978774
674	530.7	Right	1	R-L	Egg-bar	0.4	2.2716	-166.649	-152.912	2691.78	2701.27	0.0568069
674	530.7	Right	1	R-L	Egg-bar	0.45	2.3133	-143.204	-64.544	2781.82	2786.25	0.0232021
674	530.7	Right	1	R-L	Egg-bar	0.5	2.355	-107.296	21.274	2977.53	2979.54	0.00714484
674	530.7	Right	1	R-L	Egg-bar	0.55	2.3967	-80.656	126.662	3198.7	3202.22	0.0395979
674	530.7	Right	1	R-L	Egg-bar	0.6	2.4384	-74.408	242.141	3224.99	3234.92	0.0750828
674	530.7	Right	1	R-L	Egg-bar	0.65	2.4801	-80.922	330.687	2954.26	2973.81	0.111936
674	530.7	Right	1	R-L	Egg-bar	0.7	2.5218	-99.792	340.914	2503.8	2528.87	0.136159
674	530.7	Right	1	R-L	Egg-bar	0.75	2.5635	-102.776	334.782	2110.74	2139.59	0.158609
674	530.7	Right	1	R-L	Egg-bar	0.8	2.6052	-88.562	286.181	1645.9	1672.94	0.173875
674	530.7	Right	1	R-L	Egg-bar	0.85	2.6469	-35.659	221.839	1261.52	1281.37	0.175851
674	530.7	Right	1	R-L	Egg-bar	0.9	2.6886	-16.271	171.92	968.746	984.017	0.177467
674	530.7	Right	1	R-L	Egg-bar	0.95	2.7303	14.823	105.665	541.4	551.814	0.19517
674	530.7	Right	1	R-L	Egg-bar	1	2.772	3.811	4.865	4.68	7.75205	1.03953
674	530.7	Right	3	L-R	Egg-bar	0	1.654	-21.38	-11.393	69.576	73.6731	0.163749	3074	2140
674	530.7	Right	3	L-R	Egg-bar	0.05	1.69765	-39.493	167.058	552.001	578.077	0.302641
674	530.7	Right	3	L-R	Egg-bar	0.1	1.7413	19.555	299.125	1431.02	1462.08	0.20903
674	530.7	Right	3	L-R	Egg-bar	0.15	1.78495	66.443	407.644	2010.15	2052.14	0.202793
674	530.7	Right	3	L-R	Egg-bar	0.2	1.8286	83.22	390.981	2297.72	2332.23	0.170161
674	530.7	Right	3	L-R	Egg-bar	0.25	1.87225	90.298	358.138	2356.15	2384.92	0.152001
674	530.7	Right	3	L-R	Egg-bar	0.3	1.9159	99.409	338.565	2412.18	2437.85	0.140356
674	530.7	Right	3	L-R	Egg-bar	0.35	1.95955	114.782	274.268	2422.31	2440.49	0.113226
674	530.7	Right	3	L-R	Egg-bar	0.4	2.0032	123.028	185.694	2457.92	2468	0.0755491
674	530.7	Right	3	L-R	Egg-bar	0.45	2.04685	105.522	116.912	2619.23	2623.96	0.0446361
674	530.7	Right	3	L-R	Egg-bar	0.5	2.0905	68.569	42.654	2911.85	2912.97	0.0146484
674	530.7	Right	3	L-R	Egg-bar	0.55	2.13415	48.843	-57.308	3184.82	3185.71	0.0179941
674	530.7	Right	3	L-R	Egg-bar	0.6	2.1778	40.33	-179.138	3225.7	3230.92	0.0555346
674	530.7	Right	3	L-R	Egg-bar	0.65	2.22145	38.487	-267.238	2958.89	2971.18	0.090317
674	530.7	Right	3	L-R	Egg-bar	0.7	2.2651	42.423	-294.721	2520.01	2537.54	0.116952
674	530.7	Right	3	L-R	Egg-bar	0.75	2.30875	46.859	-289.297	2125.94	2146.05	0.136079
674	530.7	Right	3	L-R	Egg-bar	0.8	2.3524	30.585	-254.219	1696.68	1715.9	0.149833
674	530.7	Right	3	L-R	Egg-bar	0.85	2.39605	-2.889	-181.831	1283.15	1295.97	0.141707
674	530.7	Right	3	L-R	Egg-bar	0.9	2.4397	-23.257	-151.454	1041.48	1052.69	0.145422
674	530.7	Right	3	L-R	Egg-bar	0.95	2.48335	-37.152	-109.313	655.775	665.861	0.166693
674	530.7	Right	3	L-R	Egg-bar	1	2.527	-2.337	-2.115	8.266	8.84656	0.255867
674	530.7	Right	6	L-R	Egg-bar	0	2.328	-31.253	-6.468	61.216	69.0361	0.105659	3094.47	2465
674	530.7	Right	6	L-R	Egg-bar	0.05	2.3691	-29.543	215.911	749.168	780.22	0.288201
674	530.7	Right	6	L-R	Egg-bar	0.1	2.4102	64.917	318.461	1735.55	1765.72	0.183493
674	530.7	Right	6	L-R	Egg-bar	0.15	2.4513	136.536	381.382	2296.78	2332.23	0.166051
674	530.7	Right	6	L-R	Egg-bar	0.2	2.4924	147.016	387.286	2537.67	2571.26	0.152615
674	530.7	Right	6	L-R	Egg-bar	0.25	2.5335	148.806	350.301	2560.58	2588.71	0.136805
674	530.7	Right	6	L-R	Egg-bar	0.3	2.5746	143.284	290.012	2517.96	2538.66	0.115177
674	530.7	Right	6	L-R	Egg-bar	0.35	2.6157	137.799	207.625	2492.5	2504.93	0.0832998
674	530.7	Right	6	L-R	Egg-bar	0.4	2.6568	115.94	129.809	2521.72	2527.72	0.0514763
674	530.7	Right	6	L-R	Egg-bar	0.45	2.6979	78.053	67.072	2683.86	2685.83	0.0249909
674	530.7	Right	6	L-R	Egg-bar	0.5	2.739	29.98	-6.666	2951.29	2951.45	0.00225868
674	530.7	Right	6	L-R	Egg-bar	0.55	2.7801	-22.495	-124.597	3233.25	3235.73	0.0385361
674	530.7	Right	6	L-R	Egg-bar	0.6	2.8212	-59.457	-241.305	3297.78	3307.13	0.073172
674	530.7	Right	6	L-R	Egg-bar	0.65	2.8623	-68.653	-327.376	3080.78	3098.88	0.106264
674	530.7	Right	6	L-R	Egg-bar	0.7	2.9034	-55.738	-357.624	2654.14	2678.7	0.134742
674	530.7	Right	6	L-R	Egg-bar	0.75	2.9445	-41.646	-345.776	2252.79	2279.56	0.153488
674	530.7	Right	6	L-R	Egg-bar	0.8	2.9856	-30.118	-314.303	1828.92	1855.98	0.171851
674	530.7	Right	6	L-R	Egg-bar	0.85	3.0267	-37.191	-237.784	1441.23	1461.19	0.164986
674	530.7	Right	6	L-R	Egg-bar	0.9	3.0678	-63.354	-195.195	1161.74	1179.73	0.168019
674	530.7	Right	6	L-R	Egg-bar	0.95	3.1089	-68.019	-147.583	738.627	756.292	0.199807
674	530.7	Right	6	L-R	Egg-bar	1	3.15	2.36	-3.063	-0.467	3.89482	6.55889
674	530.7	Right	7	L-R	Egg-bar	0	2.069	-16.95	6.5	27.218	32.7165	0.238813	3049.91	2345
674	530.7	Right	7	L-R	Egg-bar	0.05	2.1112	-9.934	201.718	611.813	644.286	0.329705
674	530.7	Right	7	L-R	Egg-bar	0.1	2.1534	48.924	241.264	1374.87	1396.73	0.175482
674	530.7	Right	7	L-R	Egg-bar	0.15	2.1956	163.309	336.801	2096.31	2129.46	0.160664
674	530.7	Right	7	L-R	Egg-bar	0.2	2.2378	177.069	373.811	2465	2499.47	0.151647
674	530.7	Right	7	L-R	Egg-bar	0.25	2.28	179.088	338.363	2481.55	2510.91	0.136351
674	530.7	Right	7	L-R	Egg-bar	0.3	2.3222	175.561	278.024	2408.19	2430.54	0.115449
674	530.7	Right	7	L-R	Egg-bar	0.35	2.3644	166.129	209.203	2407.17	2421.95	0.0869084
674	530.7	Right	7	L-R	Egg-bar	0.4	2.4066	149.604	130.872	2540.09	2547.86	0.0515225
674	530.7	Right	7	L-R	Egg-bar	0.45	2.4488	127.995	63.81	2735.36	2739.1	0.0233278
674	530.7	Right	7	L-R	Egg-bar	0.5	2.491	97.09	-27.879	3047.37	3049.04	0.00914855
674	530.7	Right	7	L-R	Egg-bar	0.55	2.5332	71.315	-124.902	3276.93	3280.08	0.0381156
674	530.7	Right	7	L-R	Egg-bar	0.6	2.5754	51.14	-248.713	3298.89	3308.64	0.075393
674	530.7	Right	7	L-R	Egg-bar	0.65	2.6176	48.683	-336.545	3057.5	3076.36	0.110072
674	530.7	Right	7	L-R	Egg-bar	0.7	2.6598	49.976	-369.075	2660.63	2686.57	0.138717
674	530.7	Right	7	L-R	Egg-bar	0.75	2.702	47.772	-352.793	2213.73	2242.17	0.159366
674	530.7	Right	7	L-R	Egg-bar	0.8	2.7442	37.758	-321.564	1838.64	1866.93	0.174893
674	530.7	Right	7	L-R	Egg-bar	0.85	2.7864	8.768	-217.32	1332.33	1349.96	0.163113
674	530.7	Right	7	L-R	Egg-bar	0.9	2.8286	-4.237	-170.968	1028.49	1042.61	0.166232
674	530.7	Right	7	L-R	Egg-bar	0.95	2.8708	-20.034	-116.508	596.606	608.206	0.195285
674	530.7	Right	7	L-R	Egg-bar	1	2.913	-2.114	-5.836	11.465	13.0374	0.509027
701	449.96	Left	1	R-L	Egg-bar	0	0.595	55.268	3.459	131.857	143.013	0.026233	3245.01	2303
701	449.96	Left	1	R-L	Egg-bar	0.05	0.63125	25.394	-159.964	608.101	629.301	0.263055
701	449.96	Left	1	R-L	Egg-bar	0.1	0.6675	53.136	-214.061	1213.94	1233.81	0.176336
701	449.96	Left	1	R-L	Egg-bar	0.15	0.70375	62.946	-329.984	1754.84	1786.7	0.188042
701	449.96	Left	1	R-L	Egg-bar	0.2	0.74	123.232	-352.503	2191.9	2223.48	0.160821
701	449.96	Left	1	R-L	Egg-bar	0.25	0.77625	143.75	-353.254	2425.71	2455.51	0.145629
701	449.96	Left	1	R-L	Egg-bar	0.3	0.8125	152.941	-315.123	2515.58	2539.85	0.125269
701	449.96	Left	1	R-L	Egg-bar	0.35	0.84875	165.967	-251.242	2479.95	2498.16	0.10131
701	449.96	Left	1	R-L	Egg-bar	0.4	0.885	169.482	-170.912	2442.25	2454.08	0.0699813
701	449.96	Left	1	R-L	Egg-bar	0.45	0.92125	160.155	-95.735	2457.93	2465	0.0389495
701	449.96	Left	1	R-L	Egg-bar	0.5	0.9575	132.156	-30.17	2572.59	2576.16	0.0117275
701	449.96	Left	1	R-L	Egg-bar	0.55	0.99375	92.159	48.51	2807.3	2809.24	0.0172799
701	449.96	Left	1	R-L	Egg-bar	0.6	1.03	69.46	170.141	3010.9	3016.5	0.0565084
701	449.96	Left	1	R-L	Egg-bar	0.65	1.06625	49.981	259.921	2951.34	2963.19	0.0880687
701	449.96	Left	1	R-L	Egg-bar	0.7	1.1025	29.496	321.105	2717.34	2736.41	0.118169
701	449.96	Left	1	R-L	Egg-bar	0.75	1.13875	18.115	344.732	2349.05	2374.28	0.146753
701	449.96	Left	1	R-L	Egg-bar	0.8	1.175	17.693	304.265	1795.29	1820.97	0.16948
701	449.96	Left	1	R-L	Egg-bar	0.85	1.21125	22.429	193.229	1285.54	1300.17	0.15031
701	449.96	Left	1	R-L	Egg-bar	0.9	1.2475	6.271	146.749	957.169	968.373	0.153316
701	449.96	Left	1	R-L	Egg-bar	0.95	1.28375	-16.733	154.967	653.511	671.842	0.23713
701	449.96	Left	1	R-L	Egg-bar	1	1.32	1.661	-1.134	1.246	2.36588	0.910112
701	449.96	Left	2	L-R	Egg-bar	0	0.992	-25.494	-20.076	80.643	86.9269	0.248949	3115.57	2350
701	449.96	Left	2	L-R	Egg-bar	0.05	1.0322	5.92	168.452	663.574	684.647	0.253856
701	449.96	Left	2	L-R	Egg-bar	0.1	1.0724	16.302	283.625	1374.87	1403.92	0.206292
701	449.96	Left	2	L-R	Egg-bar	0.15	1.1126	-1.528	350.062	1827.32	1860.55	0.191571
701	449.96	Left	2	L-R	Egg-bar	0.2	1.1528	-35.261	359.727	2143.58	2173.84	0.167816
701	449.96	Left	2	L-R	Egg-bar	0.25	1.193	-44.191	355.454	2314.16	2341.71	0.1536
701	449.96	Left	2	L-R	Egg-bar	0.3	1.2332	-56.575	314.129	2374.3	2395.66	0.132304
701	449.96	Left	2	L-R	Egg-bar	0.35	1.2734	-80.208	238.9	2342.93	2356.44	0.101966
701	449.96	Left	2	L-R	Egg-bar	0.4	1.3136	-93.975	159.726	2338.84	2346.17	0.0682928
701	449.96	Left	2	L-R	Egg-bar	0.45	1.3538	-96.433	84.547	2379.33	2382.78	0.035534
701	449.96	Left	2	L-R	Egg-bar	0.5	1.394	-70.584	23.689	2538.25	2539.34	0.00933282
701	449.96	Left	2	L-R	Egg-bar	0.55	1.4342	-45.431	-64.408	2800.91	2802.02	0.0229954
701	449.96	Left	2	L-R	Egg-bar	0.6	1.4744	-36.158	-175.82	2924.01	2929.52	0.0601297
701	449.96	Left	2	L-R	Egg-bar	0.65	1.5146	-27.782	-270.111	2839.26	2852.21	0.0951343
701	449.96	Left	2	L-R	Egg-bar	0.7	1.5548	-21.216	-330.752	2581.25	2602.44	0.128136
701	449.96	Left	2	L-R	Egg-bar	0.75	1.595	-19.755	-346.514	2172.39	2199.94	0.159508
701	449.96	Left	2	L-R	Egg-bar	0.8	1.6352	-29.695	-327.956	1799.64	1829.52	0.182234
701	449.96	Left	2	L-R	Egg-bar	0.85	1.6754	-17.057	-204.99	1248	1264.83	0.164255
701	449.96	Left	2	L-R	Egg-bar	0.9	1.7156	5.195	-138.1	859.876	870.911	0.160605
701	449.96	Left	2	L-R	Egg-bar	0.95	1.7558	13.535	-123.266	517.688	532.333	0.238109
701	449.96	Left	2	L-R	Egg-bar	1	1.796	0.488	2.45	3.915	4.64412	0.625798
701	449.96	Left	3	R-L	Egg-bar	0	1.617	7.437	-6.593	40.04	41.255	0.16466	Peak Front	Peak Hind
701	449.96	Left	3	R-L	Egg-bar	0.05	1.65755	15.082	-171.055	480.425	510.192	0.356049	4102.97	2774
701	449.96	Left	3	R-L	Egg-bar	0.1	1.6981	34.793	-138.352	986.25	996.514	0.140281
701	449.96	Left	3	R-L	Egg-bar	0.15	1.73865	74.216	-343.842	1646.94	1684.09	0.208776
701	449.96	Left	3	R-L	Egg-bar	0.2	1.7792	122.585	-358.208	2046.15	2080.88	0.175065
701	449.96	Left	3	R-L	Egg-bar	0.25	1.81975	138.813	-325.091	2220.86	2248.82	0.146381
701	449.96	Left	3	R-L	Egg-bar	0.3	1.8603	146.622	-290.93	2343.56	2366.09	0.12414
701	449.96	Left	3	R-L	Egg-bar	0.35	1.90085	148.196	-239.317	2361.47	2378.18	0.101343
701	449.96	Left	3	R-L	Egg-bar	0.4	1.9414	146.227	-165.785	2374.16	2384.43	0.069829
701	449.96	Left	3	R-L	Egg-bar	0.45	1.98195	130.369	-95.538	2433.09	2438.46	0.039266
701	449.96	Left	3	R-L	Egg-bar	0.5	2.0225	92.298	-31.184	2593.24	2595.07	0.0120251
701	449.96	Left	3	R-L	Egg-bar	0.55	2.06305	64.135	57.272	2789.07	2790.39	0.0205345
701	449.96	Left	3	R-L	Egg-bar	0.6	2.1036	39.455	153.04	2817.22	2821.65	0.054323
701	449.96	Left	3	R-L	Egg-bar	0.65	2.14415	15.284	231.004	2683.65	2693.62	0.0860784
701	449.96	Left	3	R-L	Egg-bar	0.7	2.1847	-1.215	284.885	2476.37	2492.7	0.115042
701	449.96	Left	3	R-L	Egg-bar	0.75	2.22525	-5.771	320.129	2193.43	2216.68	0.145949
701	449.96	Left	3	R-L	Egg-bar	0.8	2.2658	0.049	325.905	1887.27	1915.2	0.172686
701	449.96	Left	3	R-L	Egg-bar	0.85	2.30635	9.438	230.03	1336.55	1356.23	0.172108
701	449.96	Left	3	R-L	Egg-bar	0.9	2.3469	0.19	127.889	889.912	899.055	0.14371
701	449.96	Left	3	R-L	Egg-bar	0.95	2.38745	-26.416	115.589	565.688	577.981	0.204333
701	449.96	Left	3	R-L	Egg-bar	1	2.428	-2.214	5.213	6.462	8.59271	0.806716
701	449.96	Left	4	L-R	Egg-bar	0	0.466	-8.758	-9.568	30.578	33.2154	0.312905
701	449.96	Left	4	L-R	Egg-bar	0.05	0.50545	-0.821	179.545	543.326	572.224	0.330455	3803.13	2500
701	449.96	Left	4	L-R	Egg-bar	0.1	0.5449	-7.816	148.586	1018.75	1029.55	0.145852
701	449.96	Left	4	L-R	Egg-bar	0.15	0.58435	-27.634	329.291	1688.49	1720.52	0.195021
701	449.96	Left	4	L-R	Egg-bar	0.2	0.6238	-70.486	334.895	2073.28	2101.34	0.161529
701	449.96	Left	4	L-R	Egg-bar	0.25	0.66325	-84.701	331.131	2299.39	2324.66	0.144008
701	449.96	Left	4	L-R	Egg-bar	0.3	0.7027	-95.89	304.244	2423.69	2444.59	0.125529
701	449.96	Left	4	L-R	Egg-bar	0.35	0.74215	-119.894	238.81	2425.02	2439.7	0.0984774
701	449.96	Left	4	L-R	Egg-bar	0.4	0.7816	-137.203	156.04	2418.42	2427.33	0.0645214
701	449.96	Left	4	L-R	Egg-bar	0.45	0.82105	-143.073	72.515	2450.64	2455.89	0.0295902
701	449.96	Left	4	L-R	Egg-bar	0.5	0.8605	-120.576	0.755	2594.38	2597.18	0.000291014
701	449.96	Left	4	L-R	Egg-bar	0.55	0.89995	-102.657	-81.441	2794.48	2797.55	0.0291435
701	449.96	Left	4	L-R	Egg-bar	0.6	0.9394	-90.734	-187.56	2873.79	2881.33	0.0652658
701	449.96	Left	4	L-R	Egg-bar	0.65	0.97885	-73.539	-270.319	2732.67	2746.99	0.0989213
701	449.96	Left	4	L-R	Egg-bar	0.7	1.0183	-56.343	-320.742	2470.38	2491.75	0.129835
701	449.96	Left	4	L-R	Egg-bar	0.75	1.05775	-48.031	-337.316	2132.11	2159.16	0.158208
701	449.96	Left	4	L-R	Egg-bar	0.8	1.0972	-47.243	-314.567	1739.8	1768.64	0.180806
701	449.96	Left	4	L-R	Egg-bar	0.85	1.13665	-31.038	-181.618	1188.6	1202.79	0.1528
701	449.96	Left	4	L-R	Egg-bar	0.9	1.1761	-12.029	-133.472	850.64	861.132	0.156908
701	449.96	Left	4	L-R	Egg-bar	0.95	1.21555	11.252	-127.508	544.825	559.66	0.234035
701	449.96	Left	4	L-R	Egg-bar	1	1.255	-0.225	-0.708	0.219	0.7745	3.23288
701	449.96	Right	1	L-R	Egg-bar	0	4.6	3.267	16.544	28.047	32.7263	0.589867
701	449.96	Right	1	L-R	Egg-bar	0.05	4.63825	24.079	152.783	432.956	459.754	0.352883	4154.11	2680
701	449.96	Right	1	L-R	Egg-bar	0.1	4.6765	43.355	142.07	982.006	993.176	0.144673
701	449.96	Right	1	L-R	Egg-bar	0.15	4.71475	73.634	263.246	1485.37	1510.31	0.177226
701	449.96	Right	1	L-R	Egg-bar	0.2	4.753	122.091	278.745	1870.17	1894.77	0.149048
701	449.96	Right	1	L-R	Egg-bar	0.25	4.79125	143.537	239.568	2071.92	2090.66	0.115626
701	449.96	Right	1	L-R	Egg-bar	0.3	4.8295	160.158	224.278	2224.19	2241.2	0.100836
701	449.96	Right	1	L-R	Egg-bar	0.35	4.86775	165.657	192.182	2294.42	2308.41	0.0837605
701	449.96	Right	1	L-R	Egg-bar	0.4	4.906	179.334	127.213	2328.74	2339.1	0.0546274
701	449.96	Right	1	L-R	Egg-bar	0.45	4.94425	180.521	57.138	2398.86	2406.32	0.0238188
701	449.96	Right	1	L-R	Egg-bar	0.5	4.9825	153.514	-15.147	2581.11	2585.71	0.00586841
701	449.96	Right	1	L-R	Egg-bar	0.55	5.02075	128.084	-114.156	2846.3	2851.47	0.0401068
701	449.96	Right	1	L-R	Egg-bar	0.6	5.059	111.419	-213.708	2975.39	2985.14	0.0718251
701	449.96	Right	1	L-R	Egg-bar	0.65	5.09725	93.297	-313.142	2872.46	2890.99	0.109015
701	449.96	Right	1	L-R	Egg-bar	0.7	5.1355	71.364	-368.453	2543.39	2570.93	0.144867
701	449.96	Right	1	L-R	Egg-bar	0.75	5.17375	55.758	-369.106	2163.05	2195.02	0.170642
701	449.96	Right	1	L-R	Egg-bar	0.8	5.212	47.266	-331.096	1730.65	1762.67	0.191313
701	449.96	Right	1	L-R	Egg-bar	0.85	5.25025	32.692	-251.821	1249.36	1274.9	0.20156
701	449.96	Right	1	L-R	Egg-bar	0.9	5.2885	15.314	-150.912	895.288	908.047	0.168563
701	449.96	Right	1	L-R	Egg-bar	0.95	5.32675	-21.698	-135.993	564.351	580.91	0.240972
701	449.96	Right	1	L-R	Egg-bar	1	5.365	-0.009	-2.453	-0.424	2.48939	5.78538
701	449.96	Right	4	L-R	Egg-bar	0	1.631	8.207	6.696	24.366	26.5687	0.274809
701	449.96	Right	4	L-R	Egg-bar	0.05	1.6693	16.242	125.156	523.255	538.26	0.239187	3842.11	2891
701	449.96	Right	4	L-R	Egg-bar	0.1	1.7076	35.866	165.172	1036.32	1050.01	0.159384
701	449.96	Right	4	L-R	Egg-bar	0.15	1.7459	77.621	228.638	1456.74	1476.61	0.156952
[truncated: 3,230 more rows]

## Sheet: Forelimb Kinetics Raw Data
SHOE	Horse_ID	Trial_ID	Horse_Side	Weight (Kg)	PF_V (N)	time_of_PF_V (s)	PF_B (N)	PF_P (N)	time_of_braking (s)	time_of_crossing (s)	time_of_propulsion (s)	Impulse_braking (N.s)	Impulse_propuslion (N.s)	Impulse_Vertical (N.s)	stance_time (s)	Velocity (m/s)	PFB/PFV Ratio
Unshod	544	1	Left	650.9	4153.46	0.46	-374.75	589.2	0.14	0.34	0.54	87.388	115.588	1834.81	0.72	-	0.090226
Unshod	544	2	Left	650.9	4060.87	0.46	-417.97	588.69	0.14	0.34	0.54	91.1138	114.588	1830.26	0.72	1.61995	0.102926
Unshod	544	3	Left	650.9	4275.32	0.48	-427.67	701.75	0.02	0.36	0.54	98.6726	130.129	1819.7	0.72	1.61719	0.100032
Unshod	544	4	Left	650.9	4343.07	0.48	-399.28	593.73	0.12	0.38	0.58	85.7059	126.878	1928.55	0.76	1.75424	0.091935
Unshod	544	1	Right	650.9	4201.93	0.48	-528.87	427.14	0.18	0.4	0.58	132.629	94.1375	2037.28	0.78	1.47031	0.125864
Unshod	544	2	Right	650.9	3912.82	0.48	-508.21	463.83	0.2	0.42	0.58	133.287	95.5186	1975.84	0.78	1.58034	0.129883
Unshod	544	3	Right	650.9	3999.38	0.46	-547.03	409.85	0.2	0.44	0.62	156.091	94.837	2118.55	0.8	1.61817	0.136779
Unshod	544	4	Right	650.9	3932.11	0.5	-475.68	475.72	0.22	0.42	0.6	128.642	103.67	1989.26	0.8	1.42123	0.120973
Unshod	714	1	Left	501.21	3101.02	0.46	-303.69	386.74	0.2	0.38	0.54	70.7796	80.2019	1485.17	0.74	2.22	0.0979323
Unshod	714	2	Left	501.21	2929.01	0.48	-348.31	285.41	0.2	0.42	0.6	90.6674	60.5565	1589.64	0.78	1.61263	0.118917
Unshod	714	3	Left	501.21	2886.7	0.52	-318.37	383.21	0.16	0.4	0.6	82.6455	89.8066	1645.32	0.82	1.69656	0.110289
Unshod	714	4	Left	501.21	3106.15	0.52	-279.61	421.49	0.18	0.38	0.6	72.2921	99.5184	1650.14	0.82	1.98442	0.0900182
Unshod	714	1	Right	501.21	3099.82	0.52	-327.9	402.9	0.18	0.4	0.62	82.8426	107.203	1693.55	0.84	1.47272	0.10578
Unshod	714	2	Right	501.21	3124.9	0.5	-278.72	429.77	0.16	0.38	0.58	66.1968	108.321	1586.3	0.8	1.5483	0.0891933
Unshod	714	3	Right	501.21	3121.48	0.48	-317.18	380	0.16	0.38	0.58	77.482	104.205	1645.14	0.82	1.36898	0.101612
Unshod	714	4	Right	501.21	3014.89	0.44	-325.44	345.26	0.16	0.36	0.54	70.4153	80.6367	1495.77	0.74	-	0.107944
Unshod	528	1	Left	585.13	4096.85	0.52	-498.88	539.12	0.18	0.42	0.64	118.034	121.836	2140.96	0.84	1.39659	0.121772
Unshod	528	2	Left	585.13	3796.1	0.56	-401.22	424.14	0.22	0.48	0.72	105.721	113.585	2180.71	0.96	1.41181	0.105693
Unshod	528	3	Left	585.13	4156.82	0.5	-501.68	483.65	0.18	0.4	0.6	109.525	101.282	2033.09	0.78	1.39332	0.120688
Unshod	528	4	Left	585.13	3837.32	0.58	-392.95	538.03	0.22	0.44	0.68	98.4168	122.06	2141.28	0.88	1.38452	0.102402
Unshod	528	1	Right	585.13	4187.59	0.44	-464.8	445.44	0.18	0.36	0.58	102.294	94.9634	1951.7	0.76	1.66839	0.110995
Unshod	528	2	Right	585.13	3770.41	0.52	-438.29	407.56	0.2	0.44	0.68	120.799	84.665	2081.86	0.88	1.22272	0.116245
Unshod	528	3	Right	585.13	4166.56	0.46	-526.06	454.59	0.18	0.4	0.54	122.728	79.5858	1925.38	0.76	1.59567	0.126258
Unshod	528	4	Right	585.13	4166.56	0.46	-526.06	454.59	0.18	0.4	0.54	122.728	79.5858	1925.38	0.76	-	0.126258
Unshod	576A	1	Left	555.65	3375.21	0.48	-398.23	415.18	0.18	0.42	0.62	97.0437	99.1903	1759.86	0.8	1.43511	0.117987
Unshod	576A	2	Left	555.65	3292.41	0.46	-464.32	393.9	0.18	0.4	0.6	112.977	88.9595	1741.72	0.78	-	0.141027
Unshod	576A	3	Left	555.65	3334.7	0.5	-376.77	378.76	0.18	0.44	0.7	97.0534	101.743	1846.82	0.88	1.36823	0.112985
Unshod	576A	4	Left	555.65	3439.29	0.44	-405.61	336.52	0.2	0.42	0.64	104.953	89.694	1768.59	0.82	1.45176	0.117934
Unshod	576A	1	Right	555.65	3375.21	0.48	-398.23	415.18	0.18	0.42	0.62	97.0437	99.1903	1759.86	0.8	1.54286	0.117987
Unshod	576A	2	Right	555.65	3286.31	0.46	-369.58	410.3	0.16	0.38	0.6	87.799	100.725	1729.43	0.8	1.26334	0.11246
Unshod	576A	3	Right	555.65	3334.7	0.5	-376.77	378.76	0.18	0.44	0.7	97.0534	101.743	1846.82	0.88	1.3676	0.112985
Unshod	576A	4	Right	555.65	3439.29	0.44	-405.61	336.52	0.2	0.42	0.64	104.953	89.694	1768.59	0.82	2.08154	0.117934
Unshod	674	1	Left	530.7	3394.88	0.46	-384.578	423.078	0.14	0.4	0.56	95.1741	87.6535	1578.59	0.78	1.54896	0.113282
Unshod	674	2	Left	530.7	3310.29	0.44	-351.421	365.57	0.14	0.38	0.54	84.2648	84.9426	1565.37	0.78	1.49635	0.10616
Unshod	674	3	Left	530.7	3483.48	0.48	-329.003	469.384	0.14	0.38	0.56	71.8287	98.6487	1598.56	0.76	1.61679	0.0944466
Unshod	674	4	Left	530.7	3022.36	0.44	-360.67	245.416	0.2	0.42	0.56	100.677	50.5165	1482.96	0.78	1.10387	0.119334
Unshod	674	1	Right	530.7	3451.16	0.44	-444.509	298.365	0.18	0.4	0.54	112.113	72.1087	1640.18	0.78	1.3639	0.1288
Unshod	674	2	Right	530.7	3291.41	0.48	-376.285	408.861	0.12	0.38	0.58	92.0464	98.6821	1714.24	0.82	1.2021	0.114323
Unshod	674	3	Right	530.7	3436.37	0.48	-507.678	409.483	0.14	0.38	0.54	117.289	86.8627	1640.61	0.78	1.22431	0.147737
Unshod	674	4	Right	530.7	3421.32	0.48	-477.918	355.805	0.12	0.4	0.54	115.764	76.9319	1668.27	0.78	1.31978	0.139688
Unshod	701	1	Left	449.96	2782.31	0.42	-332.482	296.266	0.14	0.38	0.56	78.812	59.2309	1317.53	0.74	1.4446	0.119499
Unshod	701	2	Left	449.96	2863.59	0.38	-345.624	219.771	0.14	0.38	0.58	90.0839	46.8867	1364.83	0.76	1.35883	0.120696
Unshod	701	3	Left	449.96	2921.36	0.4	-310.815	293.393	0.14	0.36	0.54	70.7363	58.1097	1313.09	0.72	1.65624	0.106394
Unshod	701	4	Left	449.96	3030	0.42	-270.138	324.284	0.14	0.36	0.52	58.218	59.4748	1263.46	0.7	1.45523	0.0891545
Unshod	701	1	Right	449.96	2887.72	0.48	-266.707	367.244	0.16	0.38	0.58	61.978	82.0947	1392.24	0.78	1.90391	0.092359
Unshod	701	2	Right	449.96	2737.55	0.44	-214.799	300.949	0.12	0.38	0.58	57.5793	72.3537	1349.36	0.78	1.46957	0.0784641
Unshod	701	3	Right	449.96	2794.69	0.48	-253.018	321.169	0.16	0.4	0.62	60.0867	74.6617	1370.82	0.8	1.26952	0.0905353
Unshod	701	4	Right	449.96	2761.61	0.44	-259.115	359.131	0.14	0.36	0.54	59.1834	82.6478	1329.11	0.76	1.52933	0.0938275
Egg-bar	544	1	Left	650.9	3965.83	0.46	-427.54	539.27	0.1	0.34	0.54	91.8548	125.521	1955.05	0.76	1.30373	0.107806
Egg-bar	544	2	Left	650.9	3947.61	0.5	-428.09	571.53	0.16	0.38	0.56	107.391	129.505	1942.73	0.78	1.43255	0.108443
Egg-bar	544	3	Left	650.9	4477.11	0.48	-427.62	613.59	0.12	0.36	0.54	104.539	124.911	1952.46	0.74	1.47606	0.0955125
Egg-bar	544	4	Left	650.9	4043.13	0.46	-446.96	543.82	0.16	0.38	0.54	112.488	104.236	1827.29	0.72	1.75603	0.110548
Egg-bar	544	1	Right	650.9	4267.55	0.46	-533.91	520.53	0.14	0.38	0.54	132.066	104.476	1942.98	0.74	1.61374	0.125109
Egg-bar	544	2	Right	650.9	4155.6	0.48	-565.79	553.48	0.14	0.38	0.56	144.508	120.117	2083.11	0.76	1.65446	0.136151
Egg-bar	544	3	Right	650.9	4012.93	0.48	-565.37	498.14	0.14	0.4	0.58	142.486	112.869	2021.39	0.78	1.7493	0.140887
Egg-bar	544	4	Right	650.9	4110.44	0.48	-534.99	571.88	0.12	0.42	0.58	141.56	124.443	2074.89	0.78	1.49213	0.130154
Egg-bar	714	1	Left	501.21	3104.76	0.4	-336.37	331.45	0.1	0.36	0.5	80.4078	60.1518	1362.21	0.68	1.32901	0.10834
Egg-bar	714	2	Left	501.21	3054.45	0.4	-423.54	272.22	0.06	0.36	0.48	91.837	49.358	1326.08	0.68	1.33771	0.138663
Egg-bar	714	3	Left	501.21	3177.19	0.48	-426.92	396.31	0.16	0.38	0.54	104.991	79.5544	1555.45	0.74	1.48797	0.13437
Egg-bar	714	4	Left	501.21	3214.98	0.44	-449.25	357	0.14	0.36	0.52	115.639	71.0874	1531.37	0.72	1.50833	0.139736
Egg-bar	714	1	Right	501.21	3144.94	0.44	-381.97	363.61	0.12	0.36	0.52	86.2516	80.695	1464.89	0.72	1.54518	0.121455
Egg-bar	714	2	Right	501.21	3261.45	0.46	-422.14	393.74	0.16	0.36	0.52	96.5987	86.9494	1535.1	0.74	1.72037	0.129433
Egg-bar	714	3	Right	501.21	3233.83	0.44	-378.89	429.82	0.18	0.34	0.5	78.6401	95.7468	1482.08	0.72	1.63501	0.117164
Egg-bar	714	4	Right	501.21	3487.47	0.44	-354.54	454.49	0.12	0.34	0.5	79.0296	97.1149	1504.19	0.72	1.6293	0.101661
Egg-bar	528	1	Left	585.13	4034.22	0.52	-447.91	492.96	0.2	0.42	0.62	110.574	117.269	2120.25	0.84	1.66169	0.111028
Egg-bar	528	2	Left	585.13	4133.44	0.46	-431.83	573.06	0.16	0.36	0.54	92.6365	116.513	1935.56	0.74	1.31053	0.104472
Egg-bar	528	3	Left	585.13	3820.58	0.52	-321.58	501.11	0.22	0.4	0.66	85.7912	135.825	2163.96	0.88	1.45738	0.0841705
Egg-bar	528	4	Left	585.13	3807.81	0.5	-502.34	524.76	0.22	0.42	0.6	119.102	104.765	2003.19	0.78	1.79518	0.131924
Egg-bar	528	1	Right	585.13	4107.47	0.5	-516.12	407.02	0.2	0.44	0.62	128.739	94.4105	2076.84	0.84	1.30492	0.125654
Egg-bar	528	2	Right	585.13	4196.58	0.5	-496.53	462.13	0.16	0.4	0.58	120.786	94.8625	2060.53	0.8	1.72633	0.118318
Egg-bar	528	3	Right	585.13	4031.73	0.5	-532.56	428.21	0.2	0.42	0.6	130.411	97.2342	2057.8	0.82	1.47369	0.132092
Egg-bar	528	4	Right	585.13	3995.72	0.52	-485.88	403	0.2	0.44	0.64	126.286	94.723	2130.9	0.88	1.65474	0.1216
Egg-bar	576A	1	Left	555.65	3508.17	0.42	-415.12	355.99	0.2	0.38	0.54	95.3665	81.3933	1645.23	0.74	1.84984	0.118329
Egg-bar	576A	2	Left	555.65	3304.25	0.46	-483.03	325.61	0.22	0.44	0.72	133.949	87.9067	1889.59	0.88	1.6074	0.146184
Egg-bar	576A	3	Left	555.65	3214.85	0.44	-468.17	314.84	0.18	0.44	0.66	128.102	75.0832	1807.28	0.82	1.44608	0.145627
Egg-bar	576A	4	Left	555.65	3279.47	0.48	-414.18	382.15	0.16	0.46	0.74	121.788	97.1467	1910.75	0.88	1.11632	0.126295
Egg-bar	576A	1	Right	555.65	3228.63	0.46	-477.18	367.58	0.22	0.5	0.78	137.258	98.4945	2084.93	0.94	1.37989	0.147796
Egg-bar	576A	2	Right	555.65	3246.46	0.5	-289.26	384.64	0.18	0.42	0.7	83.2204	106.487	1826.28	0.88	1.38653	0.0891001
Egg-bar	576A	3	Right	555.65	3241.66	0.46	-396.48	380.81	0.18	0.4	0.58	99.9194	90.2383	1719.53	0.78	1.68853	0.122308
Egg-bar	576A	4	Right	555.65	3290.05	0.44	-418.71	322.55	0.18	0.4	0.58	103.747	80.996	1713.49	0.78	1.2358	0.127266
Egg-bar	674	1	Left	530.7	3207.3	0.52	-332.608	308.576	0.2	0.44	0.62	89.0576	83.0442	1734.99	0.88	2.11468	0.103703
Egg-bar	674	2	Left	530.7	3206.78	0.52	-307.222	396.112	0.2	0.42	0.64	77.2918	105.65	1718.81	0.86	1.57625	0.0958039
Egg-bar	674	3	Left	530.7	3139.32	0.52	-357.599	348.06	0.2	0.46	0.64	97.9379	98.9967	1805.48	0.9	1.12174	0.11391
Egg-bar	674	4	Left	530.7	3193.98	0.52	-332.269	350.185	0.2	0.44	0.64	91.0333	95.6542	1783.63	0.88	1.6754	0.10403
Egg-bar	674	1	Right	530.7	3316.56	0.52	-405.908	339.456	0.16	0.44	0.62	103.507	89.199	1775.58	0.88	1.52911	0.122388
Egg-bar	674	2	Right	530.7	3102.85	0.48	-330.732	333.959	0.16	0.4	0.58	79.9116	89.6444	1668.22	0.86	1.2	0.10659
Egg-bar	674	3	Right	530.7	3251.82	0.52	-409.853	293.276	0.16	0.46	0.62	109.984	77.6413	1754.93	0.88	1.29343	0.126038
Egg-bar	674	4	Right	530.7	3297.78	0.5	-393.66	357.624	0.14	0.4	0.58	93.2062	95.0332	1754.91	0.84	1.45662	0.119371
Egg-bar	701	1	Left	449.96	3017.11	0.44	-358.993	343.97	0.16	0.36	0.54	81.6901	70.4118	1420.07	0.72	1.77897	0.118986
Egg-bar	701	2	Left	449.96	2922.93	0.5	-361.871	346.23	0.18	0.42	0.6	92.4454	80.9162	1532.69	0.82	1.79298	0.123804
Egg-bar	701	3	Left	449.96	2830.04	0.46	-362.85	329.189	0.14	0.4	0.64	87.463	74.4707	1508.69	0.8	1.15228	0.128214
Egg-bar	701	4	Left	449.96	2960.4	0.48	-371.31	361.791	0.14	0.38	0.56	85.0136	75.5696	1425.18	0.76	2.10445	0.125426
Egg-bar	701	1	Right	449.96	2978.78	0.46	-279.304	371.776	0.14	0.36	0.56	61.5178	85.9307	1398.57	0.76	1.81838	0.0937646
Egg-bar	701	2	Right	449.96	2876.85	0.48	-231.844	365.964	0.14	0.38	0.58	53.7832	89.0359	1423.1	0.8	1.81518	0.0805896
Egg-bar	701	3	Right	449.96	3021.94	0.44	-239.036	399.454	0.14	0.36	0.52	55.3176	83.1955	1320.57	0.74	1.58808	0.0791001
Egg-bar	701	4	Right	449.96	2914.86	0.48	-273.072	413.381	0.14	0.38	0.58	65.085	100.942	1460.15	0.8	1.81637	0.0936827
Heart-bar	544	1	Left	650.9	4091.35	0.5	-441.16	630.88	0.16	0.38	0.58	107.528	134.718	1995.26	0.78	1.80557	0.107827
Heart-bar	544	2	Left	650.9	3829.83	0.46	-453	548.97	0.16	0.36	0.56	104.147	120.337	1920.78	0.76	1.83174	0.118282
Heart-bar	544	3	Left	650.9	4150.2	0.5	-467.21	586.75	0.16	0.38	0.58	112.5	130.168	2002.55	0.78	1.81477	0.112575
Heart-bar	544	4	Left	650.9	4003.04	0.46	-462.51	541.11	0.14	0.38	0.56	108.627	114.648	1894.17	0.76	1.22033	0.11554
Heart-bar	544	1	Right	650.9	4021.53	0.5	-600.34	527.5	0.14	0.4	0.58	149.825	114.296	2007.2	0.78	1.87515	0.149281
Heart-bar	544	2	Right	650.9	4076.02	0.5	-486.47	595.25	0.16	0.4	0.6	123.263	133.988	2075.07	0.8	1.77178	0.119349
Heart-bar	544	3	Right	650.9	4094.42	0.52	-508.5	598.93	0.16	0.4	0.62	126.985	124.592	2117.63	0.78	1.78249	0.124193
Heart-bar	544	4	Right	650.9	4046.61	0.52	-472.4	504.25	0.16	0.42	0.62	133.047	119.295	2166.99	0.82	1.36944	0.11674
Heart-bar	714	1	Left	501.21	3150.74	0.46	-400.27	379.84	0.18	0.38	0.56	101.201	85.8587	1576.27	0.76	1.48603	0.12704
Heart-bar	714	2	Left	501.21	3204.32	0.48	-387.14	404.29	0.2	0.38	0.56	93.2751	78.0017	1515.93	0.74	1.49491	0.120818
Heart-bar	714	3	Left	501.21	3314.62	0.42	-379.93	395.03	0.12	0.34	0.5	86.3754	73.2774	1462.29	0.68	1.61594	0.114622
Heart-bar	714	4	Left	501.21	3240.19	0.48	-351.85	441.6	0.14	0.34	0.54	75.1993	95.2063	1567.3	0.74	1.85036	0.108589
Heart-bar	714	1	Right	501.21	3215.43	0.42	-394.44	367.48	0.16	0.34	0.48	83.8844	80.6149	1463.26	0.7	1.65566	0.122671
Heart-bar	714	2	Right	501.21	3239.38	0.44	-347.52	413.8	0.02	0.32	0.5	74.3458	89.3769	1457.99	0.7	1.56263	0.10728
Heart-bar	714	3	Right	501.21	3156.04	0.44	-372.65	392.72	0.12	0.36	0.52	85.4506	86.5965	1482.49	0.72	1.67201	0.118075
Heart-bar	714	4	Right	501.21	3470.98	0.42	-432.53	436.03	0.14	0.34	0.48	90.0677	86.6813	1462.9	0.68	1.69048	0.124613
Heart-bar	528	1	Left	585.13	3785.09	0.5	-507.78	469.23	0.2	0.42	0.62	128.708	102.897	2055.25	0.82	2.31344	0.134153
Heart-bar	528	2	Left	585.13	3853.42	0.54	-488.21	507.89	0.2	0.44	0.64	126.351	110.534	2073.73	0.86	1.21034	0.126695
Heart-bar	528	3	Left	585.13	3811.29	0.6	-428.03	510.04	0.22	0.46	0.72	119.052	131.613	2267.97	0.94	1.17319	0.112306
Heart-bar	528	4	Left	585.13	3701.25	0.56	-466.76	424.34	0.22	0.46	0.68	128.967	105.76	2156.73	0.9	1.3013	0.126109
Heart-bar	528	1	Right	585.13	3751.67	0.56	-371.69	463.34	0.22	0.46	0.74	103.341	114.057	2239.75	0.96	1.20082	0.0990732
Heart-bar	528	2	Right	585.13	3630.13	0.56	-416.98	493.86	0.22	0.48	0.78	119.914	125.951	2421.81	1	1.20751	0.114866
Heart-bar	528	3	Right	585.13	3832.4	0.54	-455.42	427.2	0.2	0.46	0.7	123.11	103.199	2247.77	0.94	1.71508	0.118834
Heart-bar	528	4	Right	585.13	3840.71	0.5	-457.11	449.05	0.18	0.44	0.7	114.936	110.05	2239.94	0.9	1.13987	0.119017
Heart-bar	576A	1	Left	555.65	3260.82	0.48	-461.34	379.1	0.18	0.44	0.68	120.986	94.678	1827.68	0.82	1.12864	0.14148
Heart-bar	576A	2	Left	555.65	3223.65	0.44	-453.87	361.67	0.18	0.42	0.64	113.6	86.7248	1758.39	0.78	1.30549	0.140794
Heart-bar	576A	3	Left	555.65	3106.62	0.42	-414.11	363.96	0.18	0.42	0.66	109.412	87.6673	1743.02	0.82	1.7301	0.133299
Heart-bar	576A	4	Left	555.65	3238.54	0.46	-483.39	361.25	0.2	0.44	0.66	124.681	87.5587	1766.74	0.82	1.60973	0.149262
Heart-bar	576A	1	Right	555.65	3261.57	0.5	-293.19	413.45	0.18	0.42	0.7	81.139	115.264	1826.09	0.88	1.54737	0.0898923
Heart-bar	576A	2	Right	555.65	3265.95	0.44	-405.01	305.14	0.16	0.42	0.6	106.73	80.0787	1697.66	0.8	1.19293	0.12401
Heart-bar	576A	3	Right	555.65	3381.39	0.44	-450.62	329.83	0.2	0.44	0.7	118.242	85.767	1806.02	0.8	1.46878	0.133265
Heart-bar	576A	4	Right	555.65	3310.58	0.44	-412.88	382.71	0.18	0.4	0.6	95.1592	95.732	1715.23	0.78	1.49759	0.124715
Heart-bar	674	1	Left	530.7	3039.77	0.46	-230.029	467.851	0.1	0.32	0.54	45.7189	106.114	1380.95	0.76	1.40717	0.0756731
Heart-bar	674	2	Left	530.7	3240.67	0.5	-369.372	361.47	0.16	0.42	0.6	94.647	93.3613	1678.23	0.84	1.48613	0.11398
Heart-bar	674	3	Left	530.7	3308.33	0.48	-353.924	375.203	0.2	0.42	0.58	92.0166	95.7861	1662.25	0.82	1.78393	0.10698
Heart-bar	674	4	Left	530.7	3463.83	0.46	-376.261	379.178	0.12	0.4	0.56	94.3249	90.6722	1680.06	0.78	1.53187	0.108626
Heart-bar	674	1	Right	530.7	3286.55	0.52	-341.458	392.288	0.18	0.42	0.68	81.7816	110.177	1746.01	0.88	2.19426	0.103895
Heart-bar	674	2	Right	530.7	3465.44	0.46	-481.222	318.812	0.14	0.42	0.56	118.844	85.9217	1774.26	0.82	1.48096	0.138863
Heart-bar	674	3	Right	530.7	3292.11	0.5	-400.297	365.42	0.14	0.42	0.66	100.444	101.903	1761.29	0.86	1.62328	0.121593
Heart-bar	674	4	Right	530.7	3395.83	0.5	-393.632	388.953	0.14	0.4	0.58	97.8198	103.027	1779.96	0.84	1.56292	0.115916
Heart-bar	701	1	Left	449.96	2439.85	0.22	-404.612	346.025	0.14	0.38	0.56	92.012	76.114	1421.99	0.76	1.49677	0.165835
Heart-bar	701	2	Left	449.96	2730	0.46	-387.19	286.276	0.16	0.42	0.66	100.239	70.0395	1473.77	0.84	1.53528	0.141828
Heart-bar	701	3	Left	449.96	2964.5	0.42	-416.148	276.621	0.14	0.4	0.54	102.04	61.1008	1417.55	0.74	1.61445	0.140377
Heart-bar	701	4	Left	449.96	2896.16	0.44	-358.806	320.12	0.14	0.38	0.54	87.6296	72.3434	1382.94	0.76	1.21468	0.12389
Heart-bar	701	1	Right	449.96	2981.52	0.46	-321.583	348.516	0.14	0.38	0.56	79.8802	79.9767	1428.8	0.78	2.16987	0.107859
Heart-bar	701	2	Right	449.96	3008.26	0.5	-257.31	445.204	0.16	0.38	0.6	61.5901	107.997	1474.18	0.82	1.53882	0.0855345
Heart-bar	701	3	Right	449.96	2990.27	0.44	-321.826	339.136	0.14	0.38	0.54	73.1179	84.5445	1430.86	0.78	1.22992	0.107625
Heart-bar	701	4	Right	449.96	2943.96	0.48	-279.194	401.625	0.14	0.38	0.56	66.1787	95.0444	1417.52	0.8	1.27952	0.0948361
Open-heel	544	1	Left	650.9	4077.35	0.46	-452.41	504.3	0.14	0.38	0.56	117.208	111.127	1944.5	0.76	1.41964	0.110957
Open-heel	544	2	Left	650.9	4075.16	0.48	-527.65	541.66	0.12	0.38	0.56	122.328	113.387	1916.56	0.76	1.6752	0.12948
Open-heel	544	3	Left	650.9	4290.69	0.48	-396.04	601.63	0.14	0.38	0.56	97.3461	125.787	1920.17	0.74	1.49494	0.0923022
Open-heel	544	4	Left	650.9	4126.08	0.46	-487.55	536.76	0.1	0.36	0.54	124.147	112.595	1898.98	0.74	1.59781	0.118163
Open-heel	544	1	Right	650.9	3986.19	0.5	-544.93	443.49	0.22	0.44	0.62	154.663	102.569	2139.87	0.82	1.57572	0.136704
Open-heel	544	2	Right	650.9	3992.21	0.48	-533.61	425.32	0.22	0.42	0.6	154.88	100.916	2071.72	0.8	1.5064	0.133663
Open-heel	544	3	Right	650.9	3826.44	0.48	-508.59	481.3	0.2	0.42	0.6	140.326	105.526	1993.78	0.8	2.07073	0.132915
Open-heel	544	4	Right	650.9	3857.56	0.52	-492.17	477.63	0.18	0.46	0.66	140.963	112.313	2142.86	0.84	1.51119	0.127586
Open-heel	714	1	Left	501.21	3002.59	0.4	-367.87	283.66	0.16	0.42	0.62	102.618	68.5681	1684.9	0.84	1.34729	0.122518
Open-heel	714	2	Left	501.21	3067.19	0.52	-343.88	399.59	0.18	0.4	0.62	98.8409	90.8375	1658.69	0.8	1.33442	0.112116
Open-heel	714	3	Left	501.21	3009.31	0.48	-322.69	354.57	0.16	0.38	0.58	79.547	86.345	1587.17	0.8	1.1838	0.107231
Open-heel	714	4	Left	501.21	3049.83	0.56	-351.68	446.3	0.2	0.42	0.62	91.8155	104.106	1635.72	0.84	1.35775	0.115311
Open-heel	714	1	Right	501.21	3036.35	0.52	-373.97	311.59	0.16	0.44	0.68	99.3749	76.7931	1661.02	0.84	1.46267	0.123164
Open-heel	714	2	Right	501.21	2992.38	0.5	-309.07	376.74	0.18	0.4	0.66	85.0836	93.5168	1653.06	0.82	1.34022	0.103286
Open-heel	714	3	Right	501.21	2991.62	0.46	-333.66	324.45	0.18	0.4	0.64	87.6461	82.7987	1610.12	0.82	1.36686	0.111532
Open-heel	714	4	Right	501.21	3014.2	0.48	-607.91	296.17	0.02	0.42	0.66	120.044	74.1121	1716.45	0.84	1.46054	0.201682
Open-heel	528	1	Left	585.13	3791.15	0.58	-412.57	408.24	0.22	0.5	0.74	118.026	107.927	2330.13	0.96	1.24949	0.108824
Open-heel	528	2	Left	585.13	3840.5	0.46	-448.78	370.23	0.2	0.42	0.6	124.339	79.1269	1977.46	0.8	1.31143	0.116855
Open-heel	528	3	Left	585.13	3920.92	0.48	-533.77	348.47	0.2	0.44	0.66	140.253	83.311	2136.26	0.84	1.38733	0.136134
Open-heel	528	4	Left	585.13	3708.98	0.6	-456.24	462.33	0.24	0.5	0.76	136.109	120.236	2409.69	0.98	1.34333	0.12301
Open-heel	528	1	Right	585.13	3929.87	0.48	-473.13	368.22	0.2	0.42	0.62	118.326	84.8723	2061.91	0.84	1.33163	0.120393
Open-heel	528	2	Right	585.13	4178.8	0.46	-472.36	447.21	0.18	0.38	0.54	107.53	89.7722	1941.36	0.76	1.13642	0.113037
Open-heel	528	3	Right	585.13	3795.81	0.48	-488.97	410.4	0.2	0.42	0.64	124.491	95.1394	2119.56	0.84	1.32181	0.128818
Open-heel	528	4	Right	585.13	3813.48	0.5	-511.31	417.24	0.2	0.4	0.6	126.409	93.3063	2049.28	0.82	1.3144	0.13408
Open-heel	567	1	Left	555.65	3213.9	0.42	-383.27	358.89	0.18	0.4	0.62	91.1383	88.5536	1688.49	0.8	1.31525	0.119254
Open-heel	567	2	Left	555.65	3469.49	0.3	-406.02	308.71	0.2	0.4	0.64	93.0429	75.4334	1629.11	0.78	1.33613	0.117026
Open-heel	567	3	Left	555.65	3151.18	0.5	-457.59	352.52	0.2	0.46	0.72	127.267	91.5229	1868.17	0.88	1.42946	0.145212
Open-heel	567	4	Left	555.65	3164.71	0.3	-431.35	300.59	0.24	0.46	0.68	119.496	68.817	1782.39	0.82	1.29958	0.1363
Open-heel	567	1	Right	555.65	3213.9	0.42	-383.27	358.89	0.18	0.4	0.62	91.1383	88.5536	1688.49	0.8	1.27364	0.119254
Open-heel	567	2	Right	555.65	3149.54	0.42	-337.64	361.11	0.2	0.4	0.66	83.9444	95.5335	1747.76	0.84	-	0.107203
Open-heel	567	3	Right	555.65	3248.31	0.42	-345.93	319.5	0.18	0.4	0.66	87.1293	86.6912	1735.63	0.82	-	0.106495
Open-heel	567	4	Right	555.65	3231.33	0.46	-407.14	340.16	0.16	0.42	0.62	101.397	87.5832	1751.56	0.82	1.39773	0.125998
Open-heel	674	1	Left	530.7	3340.88	0.44	-476.592	330.725	0.12	0.4	0.54	114.031	78.1844	1644.91	0.78	1.60085	0.114216
Open-heel	674	2	Left	530.7	3300.6	0.48	-474.63	338.495	0.14	0.4	0.56	113.71	81.0445	1670.24	0.8	1.54905	0.113605
Open-heel	674	3	Left	530.7	3407.89	0.5	-409.885	429.464	0.14	0.4	0.56	95.0698	98.7693	1699.52	0.8	1.38073	0.0851332
Open-heel	674	4	Left	530.7	3315.02	0.5	-445.216	367.971	0.14	0.42	0.58	109.958	92.5463	1733.69	0.82	1.39024	0.116685
Open-heel	674	1	Right	530.7	3384	0.5	-336.564	330.955	0.14	0.4	0.58	88.545	96.9025	1759.56	0.84	1.75184	0.0624603
Open-heel	674	2	Right	530.7	3511.8	0.48	-411.41	412.526	0.12	0.4	0.56	103.396	102.552	1767.4	0.82	1.26058	0.0946352
Open-heel	674	3	Right	530.7	3360.66	0.52	-448.608	394.069	0.14	0.42	0.6	112.738	103.263	1819.88	0.86	1.20919	0.0678989
Open-heel	674	4	Right	530.7	3478.76	0.52	-428.264	381.896	0.14	0.44	0.6	116.01	88.5539	1790.4	0.86	1.43892	0.0695128
Open-heel	701	1	Left	449.96	2779.35	0.48	-351.971	270.785	0.2	0.42	0.62	92.5764	61.7989	1473.67	0.8	1.41368	0.126638
Open-heel	701	2	Left	449.96	2790.91	0.48	-367.056	335.528	0.16	0.4	0.6	92.5148	72.6447	1454.93	0.78	1.3717	0.131518
Open-heel	701	3	Left	449.96	2734.79	0.5	-294.408	307.386	0.2	0.42	0.66	77.0434	74.5717	1551.19	0.86	1.49184	0.107653
Open-heel	701	4	Left	449.96	2819.52	0.46	-346.299	305.619	0.16	0.38	0.6	86.6553	71.7774	1480.12	0.8	1.72358	0.122822
Open-heel	701	1	Right	449.96	2962.62	0.5	-255.373	357.406	0.14	0.4	0.6	65.2461	84.6305	1481.2	0.82	1.48744	0.0861984
Open-heel	701	2	Right	449.96	2905.59	0.48	-256.227	381.151	0.14	0.36	0.56	61.1947	83.3032	1412.65	0.76	1.32232	0.0881842
Open-heel	701	3	Right	449.96	2732.25	0.48	-245.381	362.425	0.14	0.36	0.58	60.7964	82.1543	1430.27	0.78	1.63131	0.089809
Open-heel	701	4	Right	449.96	2794.54	0.48	-241.016	355.824	0.14	0.36	0.58	60.8763	88.9334	1463.34	0.8	1.34594	0.0862453
Wooden Clog	544	1	Left	650.9	3761.71	0.52	-509.34	534.39	0.18	0.4	0.6	122.071	117.849	1944.22	0.78	1.78127	0.135401
Wooden Clog	544	2	Left	650.9	4040.41	0.5	-555.61	587.98	0.16	0.4	0.6	134.411	127.754	2012.89	0.76	1.39259	0.137513
Wooden Clog	544	3	Left	650.9	3854.69	0.56	-525.93	634.43	0.2	0.42	0.64	134.871	138.625	2043.72	0.82	1.75602	0.136439
Wooden Clog	544	4	Left	650.9	3719.46	0.5	-555.2	509.71	0.2	0.42	0.62	133.689	113.524	1983.11	0.8	1.45843	0.149269
Wooden Clog	544	1	Right	650.9	3963.63	0.52	-563.31	597.65	0.2	0.42	0.62	138.171	127.715	2073.45	0.78	1.65291	0.14212
Wooden Clog	544	2	Right	650.9	3873.79	0.5	-607.17	570.44	0.2	0.42	0.62	151.708	115.996	2007.37	0.78	1.76185	0.156738
Wooden Clog	544	3	Right	650.9	4029.05	0.5	-568.39	564.89	0.18	0.42	0.64	142.73	125.941	2101.09	0.8	1.13482	0.141073
Wooden Clog	544	4	Right	650.9	3719.62	0.52	-642.59	523.44	0.2	0.44	0.64	159.752	113.746	2049.92	0.8	1.51036	0.172757
Wooden Clog	714	1	Left	501.21	3147.95	0.4	-427.75	345.22	0.18	0.38	0.52	98.6482	62.6321	1412.78	0.66	1.47728	0.135882
Wooden Clog	714	2	Left	501.21	2818.06	0.46	-459.95	363.26	0.2	0.4	0.58	110.63	67.2379	1492.62	0.72	2.17797	0.163215
Wooden Clog	714	3	Left	501.21	3077.14	0.5	-453.88	449.4	0.18	0.38	0.58	108.582	81.9167	1576.09	0.72	1.94736	0.147501
Wooden Clog	714	4	Left	501.21	3299.91	0.46	-341.34	505.91	0.04	0.34	0.56	71.679	98.6393	1524.07	0.68	1.58695	0.103439
Wooden Clog	714	1	Right	501.21	3232.47	0.5	-389.74	531.31	0.16	0.4	0.6	99.7532	108.765	1638.55	0.76	1.66578	0.12057
Wooden Clog	714	2	Right	501.21	3108.74	0.5	-378.95	473.46	0.18	0.38	0.6	92.2507	99.7326	1598.8	0.76	1.32218	0.121898
Wooden Clog	714	3	Right	501.21	3110.4	0.54	-400.81	488.3	0.18	0.42	0.64	97.2495	96.9275	1616.94	0.78	1.38046	0.128861
Wooden Clog	714	4	Right	501.21	3093.6	0.52	-444.68	458.9	0.18	0.42	0.64	110.171	100.004	1694.73	0.8	1.17108	0.143742
Wooden Clog	528	1	Left	585.13	3662.9	0.56	-522.56	498.63	0.22	0.46	0.72	138.802	116.924	2251.81	0.88	1.8379	0.142663
Wooden Clog	528	2	Left	585.13	3747.29	0.58	-503.68	568.75	0.22	0.46	0.7	127.782	125.415	2196.09	0.86	1.80327	0.134412
Wooden Clog	528	3	Left	585.13	3691.2	0.7	-341.74	609.27	0.26	0.5	0.82	95.8293	156.981	2408.92	0.98	2.27762	0.0925824
Wooden Clog	528	4	Left	585.13	3620.77	0.58	-509.08	507.35	0.24	0.48	0.7	132.118	112.069	2169.92	0.86	1.31844	0.1406
Wooden Clog	528	1	Right	585.13	3667.81	0.58	-488.31	476.2	0.22	0.48	0.72	135.782	107.482	2288.24	0.9	1.21058	0.133134
Wooden Clog	528	2	Right	585.13	4037.89	0.54	-613.91	567.59	0.2	0.42	0.64	150.754	113.262	2059.86	0.78	1.10819	0.152037
Wooden Clog	528	3	Right	585.13	4247.84	0.5	-514.67	569.68	0.18	0.4	0.58	122.067	100.298	1900.44	0.72	1.4724	0.12116
Wooden Clog	528	4	Right	585.13	3868.39	0.56	-556.8	508.6	0.22	0.46	0.7	146.588	112.6	2242.97	0.86	1.4384	0.143936
Wooden Clog	567	1	Left	555.65	3287.94	0.48	-473.96	385.99	0.2	0.44	0.68	122.753	90.799	1826.73	0.8	1.23667	0.144151
Wooden Clog	567	2	Left	555.65	3274.31	0.46	-546.13	365.36	0.18	0.42	0.64	134.868	87.4816	1790.01	0.78	1.63687	0.166792
Wooden Clog	567	3	Left	555.65	3184.33	0.44	-512.01	359.52	0.2	0.42	0.66	118.693	86.24	1773.85	0.8	1.1258	0.16079
Wooden Clog	567	4	Left	555.65	3280.47	0.48	-540.74	383.72	0.2	0.42	0.66	123.56	94.7446	1766.63	0.8	1.72889	0.164836
Wooden Clog	567	1	Right	555.65	3243.92	0.44	-395.49	371.57	0.18	0.4	0.66	95.5528	96.174	1730.29	0.78	1.39055	0.121917
Wooden Clog	567	2	Right	555.65	3223.2	0.46	-401.53	381.51	0.2	0.4	0.66	97.5862	98.6907	1758.24	0.8	1.18471	0.124575
Wooden Clog	567	3	Right	555.65	3258.03	0.44	-451.54	366.55	0.18	0.4	0.58	103.293	91.0053	1696.3	0.76	1.2155	0.138593
Wooden Clog	567	4	Right	555.65	3230.4	0.24	-482.48	381.66	0.18	0.4	0.62	107.262	92.1527	1741.74	0.78	1.65562	0.149356
Wooden Clog	674	1	Left	530.7	3159.11	0.58	-173.996	483.406	0.24	0.4	0.72	37.9445	121.918	1730.6	0.88	1.55721	0.0550775
Wooden Clog	674	2	Left	530.7	3247.96	0.48	-337.431	318.558	0.2	0.42	0.6	80.5005	79.3485	1656.26	0.8	1.4018	0.10389
Wooden Clog	674	3	Left	530.7	3216.38	0.5	-289.953	416.681	0.22	0.4	0.6	69.5059	96.1123	1616.19	0.78	1.49497	0.0901489
Wooden Clog	674	4	Left	530.7	3313.43	0.54	-327.336	411.208	0.2	0.44	0.68	85.3677	102.363	1780.43	0.86	1.301	0.0987906
Wooden Clog	674	1	Right	530.7	3410.81	0.5	-337.068	366.003	0.18	0.38	0.6	76.8076	91.5892	1738.87	0.82	1.57675	0.0988236
Wooden Clog	674	2	Right	530.7	3443.76	0.52	-331.958	350.57	0.18	0.44	0.62	88.1495	75.495	1692.18	0.82	1.92412	0.0963942
Wooden Clog	674	3	Right	530.7	3433.98	0.52	-353.905	377.635	0.16	0.42	0.6	92.5911	77.4489	1654.99	0.8	1.25492	0.10306
Wooden Clog	674	4	Right	530.7	3233.88	0.5	-347.538	337.456	0.2	0.42	0.64	81.1315	95.1998	1841.87	0.86	1.62165	0.107468
Wooden Clog	701	1	Left	449.96	2577.96	0.34	-294.443	294.939	0.28	0.48	0.72	83.924	66.5953	1578.86	0.86	1.29775	0.114216
Wooden Clog	701	2	Left	449.96	2587.55	0.56	-293.958	291.158	0.26	0.48	0.72	83.0451	63.6543	1595.44	0.86	1.20572	0.113605
Wooden Clog	701	3	Left	449.96	2593.02	0.52	-220.752	321.063	0.24	0.4	0.68	55.6627	77.2449	1499.73	0.82	1.56997	0.0851332
Wooden Clog	701	4	Left	449.96	2730.68	0.54	-318.628	284.988	0.26	0.48	0.68	91.2794	57.7609	1512.31	0.82	1.38653	0.116685
Wooden Clog	701	1	Right	449.96	2841.57	0.48	-177.485	422.81	0.2	0.34	0.58	39.8115	92.5525	1358.01	0.74	1.44114	0.0624603
Wooden Clog	701	2	Right	449.96	2722.05	0.48	-257.602	373.673	0.18	0.38	0.58	61.5078	70.2603	1365.89	0.72	1.74881	0.0946352
Wooden Clog	701	3	Right	449.96	2815.48	0.48	-191.168	419.011	0.18	0.32	0.56	37.4786	88.8272	1336.8	0.7	1.51261	0.0678989
Wooden Clog	701	4	Right	449.96	2758.44	0.46	-191.747	372.81	0.2	0.34	0.54	43.5471	72.4123	1217.96	0.7	1.22141	0.0695128
